# Supplementary material for: Synthesis of modified bile acids via palladium-catalyzed C(sp3)–H (hetero)arylation
Source: Royal Society of Chemistry journal article supplement (doi:10.1039/d3ob00916e), 2023-01-01
Supplement: d3ob00916e1.pdf [file d3ob00916e1.pdf]

*Supporting Information for*

## **Synthesis of Modified Bile Acids via Palladium-Catalyzed C(sp<sup>3</sup>)-H (Hetero)arylation**

Somnath Arjun Borade,<sup>a</sup> Sushma Naharwal,<sup>a</sup> Himanshi Bhambri,<sup>b</sup> Sanjay K. Mandal,<sup>b</sup> Kiran Bajaj,<sup>c</sup> Deepak Chitkara,<sup>d</sup> Rajeev Sakhuja<sup>a\*</sup>

<sup>a</sup>Department of Chemistry, Birla Institute of Technology and Science, Pilani, Rajasthan 333031, India

<sup>b</sup>Department of Chemical Sciences, Indian Institute of Science Education and Research Mohali, Sector 81, SAS Nagar, Manuli P.O., Mohali, Punjab 140306, India

<sup>c</sup>Department of Chemistry, Amity Institute of Applied Sciences, Amity University, Noida, Uttar Pradesh, India

<sup>d</sup>Department of Pharmacy, Birla Institute of Technology and Science, Pilani, Rajasthan 333031, India

### **Contents**

|                                                                                                     |     |
|-----------------------------------------------------------------------------------------------------|-----|
| 1. Preparation of Starting Materials.....                                                           | S02 |
| 2. Original <sup>1</sup> H & <sup>13</sup> C NMR Spectra of <b>1b</b> , <b>3</b> & <b>4ba</b> ..... | S04 |
| 3. Competitive Experiment.....                                                                      | S39 |
| 4. Characterization Data of Intermediate Complex (Crude).....                                       | S39 |
| 5. HPLC Profiles of <b>3</b> .....                                                                  | S39 |
| 6. X-Ray Crystallographic Study of <b>3aa</b> .....                                                 | S44 |
| 7. References.....                                                                                  | S45 |

## 1. Preparation of starting materials

### General procedure for the synthesis of *O*-methylated cholic acid (CA) and deoxycholic acid (DCA) (1A-B)

To a suspension of NaH [(4.40 g, 183.5 mmol, 15 equiv, 55 % dispersion in mineral oil for cholic acid **A**)/(4.58 g, 191.0 mmol, 15 equiv for deoxycholic acid **B**)] in dry THF (100 mL) at 0 °C, a solution of **A** (5.0 g, 12.23 mmol, 1 equiv)/**B** (5.0 g, 12.73 mmol, 1 equiv) in THF (30 mL) was added. After allowing the reaction mixture to stir at room temperature for 1 h, it was cooled to 0 °C. After this, MeI [(7.61 mL, 122.3 mmol, 10 equiv for **A**) and (7.92 mL, 127.3 mmol, 10 equiv for **B**)] was slowly added to the mixture, and it was allowed to stir for 24 h at 40 °C. A second portion of NaH [(4.40 g for **A** and (4.58 g for **B**)] and MeI [(7.61 mL, 122.3 mmol, for **A**) and (7.92 mL, 127.3 mmol for **B**)] were added to the reaction mixture, and the reaction mixture was allowed to stir for another 24 h at 40 °C. Thereafter, the reaction mixture was quenched by slow addition of saturated aqueous NH<sub>4</sub>Cl (50 mL) at 0 °C. Tetrahydrofuran were removed under reduced pressure. To the resulting suspension, ethyl acetate (100 mL) was added and the mixture was washed with water (3 × 50 mL). The organic layers were dried over Na<sub>2</sub>SO<sub>4</sub>, filtered, and concentrated *in vacuo*. The crude product was purified by flash column chromatography (Hexanes/EtOAc, 70:30) to afford 4.63 g (84%) of compound **1A** and 4.71 g (88%) of compound **1B** as a white solid. TLC R<sub>f</sub> = 0.36 (Hexanes/EtOAc, 70:30).

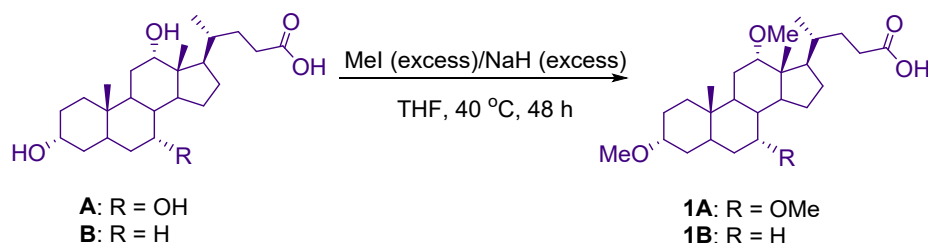

**(4R)-4-((3R,7R,10S,12S,13R,17R)-3,7,12-trimethoxy-10,13-dimethylhexadecahydro-1H-cyclopenta[*a*]phenanthren-17-yl)pentanoic acid (1A).** Compound **1A** was prepared by literature reported procedure<sup>1</sup> as a white solid; 5.01 g (91%); m.p. 64-68 °C (Lit. m.p. 65-70 °C).

**(4R)-4-((3R,10S,12S,13R,17R)-3,12-dimethoxy-10,13-dimethylhexadecahydro-1H-cyclopenta[*a*]phenanthren-17-yl)pentanoic acid (1B).** Compound **1B** was prepared by literature reported procedure<sup>2</sup> as a white solid; 4.71 g (88%); m.p. 140-144 °C (Lit. m.p. not reported).

## General procedure for the synthesis of *O*-methylated *N*-(quinolin-8-yl)choly/deoxycholy amides (**1a-b**)

To a stirred solution of *O*-methylated cholic acid (**1A**) [or deoxycholic acid (**1B**)] [3.0 g, 1 equiv] in dry DCM (100 mL), thionyl chloride (3 equiv) was added at room temperature. The reaction mixture was stirred under reflux conditions at 55 °C for 6 h and was monitored by TLC. After the completion of the reaction, DCM and excess of thionyl chloride was removed under reduced pressure. To the resulting dry crude *O*-methylated choly/deoxycholy chloride, freshly distilled DCM (100 mL) and 8-aminoquinoline (1.2 equiv) were added and the mixture was stirred at room temperature for 10 h. Thereafter, the resulting reaction mixture was washed with 1 M HCl (3 × 50 mL) solution to remove unreacted 8-aminoquinoline. The organic layer was separated, dried to afford crude product, which was purified by flash column chromatography (Hexanes/EtOAc, 90:10) to afford pure *O*-methylated *N*-(quinolin-8-yl)choly/deoxycholy amide (**1a-b**).

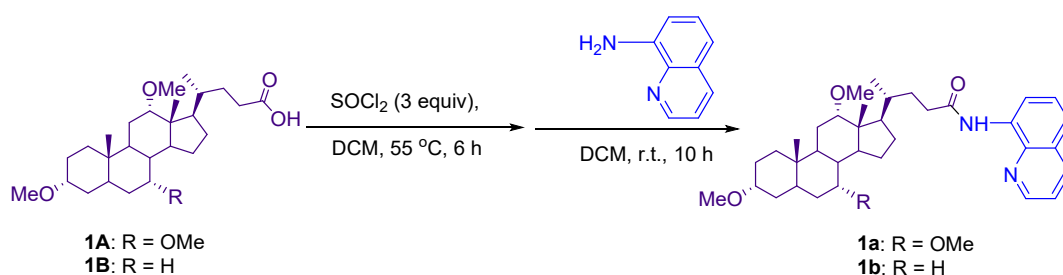

### (4*R*)-*N*-(quinolin-8-yl)-4-((3*R*,7*R*,10*S*,12*S*,13*R*,17*R*)-3,7,12-trimethoxy-10,13-dimethylhexadecahydro-1*H*-cyclopenta[*a*]phenanthren-17-yl)pentanamide (**1a**).

Compound **1a** was prepared by literature reported procedure<sup>3</sup> as a white solid; 3.56 gm (93%); (Lit. m.p. 158-160 °C).

### (4*R*)-4-((3*R*,10*S*,12*S*,13*R*,17*R*)-3,12-dimethoxy-10,13-dimethylhexadecahydro-1*H*

**cyclopenta[*a*]phenanthren-17-yl)-*N*-(quinolin-8-yl)pentanamide (**1b**). White solid, 3.51 gm (90%); m.p. 150-152 °C; <sup>1</sup>H NMR (400 MHz, CDCl<sub>3</sub>, ppm) δ 9.84 (s, 1H), 8.87 - 8.77 (m, 2H), 8.18 (d, *J* = 8.0 Hz, 1H), 7.58 - 7.45 (m, 3H), 3.45 - 3.40 (m, 1H), 3.63 (s, 3H), 3.29 (s, 3H), 3.22 - 3.11 (m, 1H), 2.70 - 2.61 (m, 1H), 2.54 - 2.44 (m, 1H), 2.06 - 1.88 (m, 4H), 1.86 - 1.70 (m, 8H), 1.64 - 1.51 (m, 6H), 1.44 - 1.31 (m, 3H), 1.25 - 1.13 (m, 3H), 1.02 (d, *J* = 6.0 Hz, 3H), 0.93 (s, 3H), 0.69 (s, 3H); <sup>13</sup>C NMR (100 MHz, CDCl<sub>3</sub>, ppm) δ 172.4, 148.1, 138.4, 136.3, 134.7, 128.0, 127.5, 121.6, 121.2, 116.4, 82.3, 80.5, 55.7, 55.5, 48.9, 46.5, 46.4, 42.1, 36.1, 35.4, 35.2, 34.9, 34.9, 33.6, 32.6, 31.5, 27.5, 27.4, 26.8, 26.1, 23.7, 23.3, 22.0, 17.6, 12.8; HRMS (ESI) *m/z* Calcd for C<sub>35</sub>H<sub>51</sub>N<sub>2</sub>O<sub>3</sub><sup>+</sup> (M+H)<sup>+</sup>: 547.3894, found 547.3885.**

## 2. Original $^1\text{H}$ & $^{13}\text{C}$ NMR Spectra of 1b, 3 & 4ba

### $^1\text{H}$ NMR of 1b (400 MHz, $\text{CDCl}_3$ )

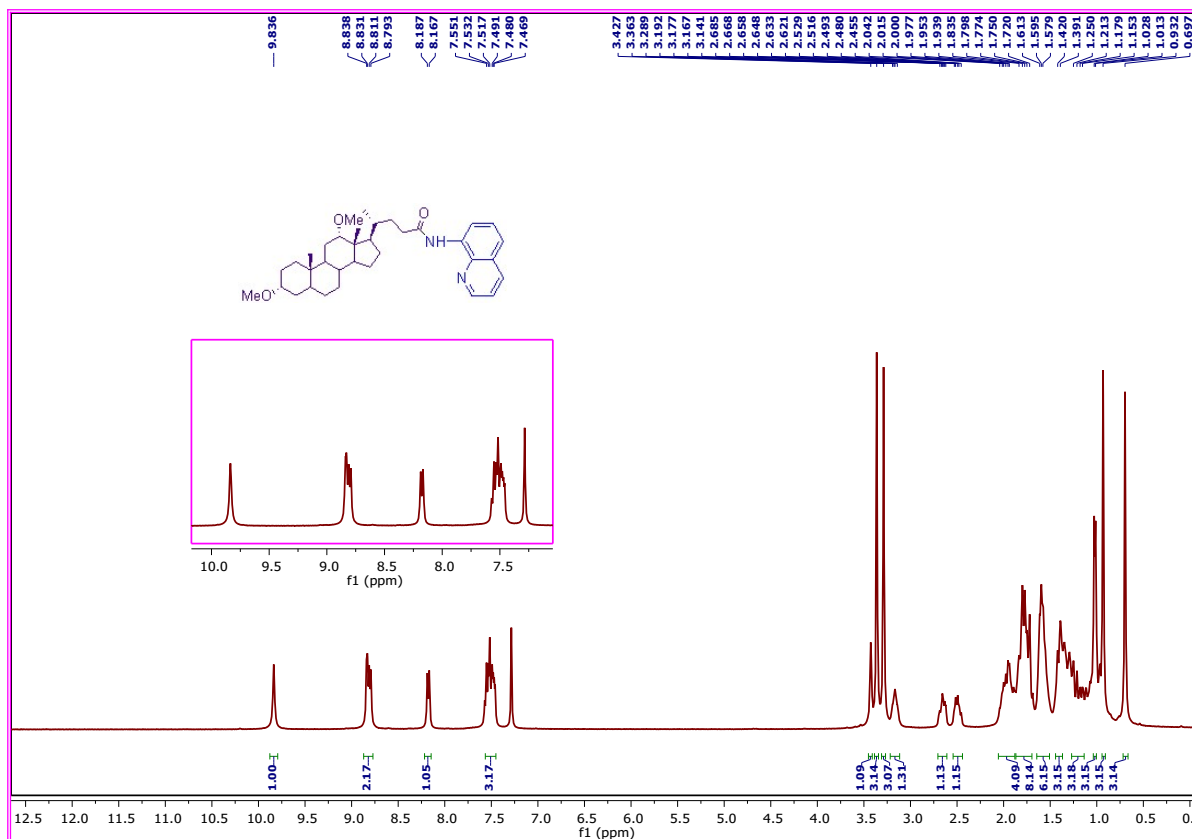

### $^{13}\text{C}$ NMR of 1b (400 MHz, $\text{CDCl}_3$ )

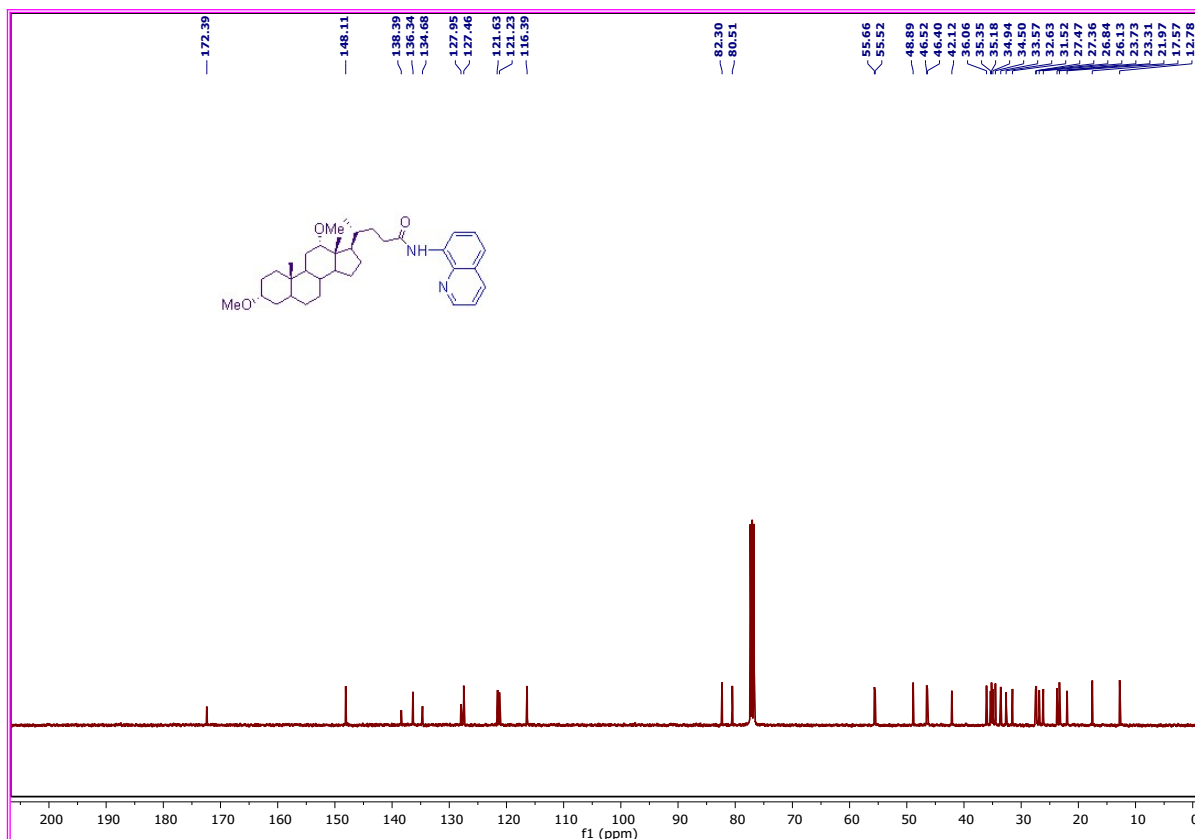

### <sup>1</sup>H NMR of 3aa (400 MHz, CDCl<sub>3</sub>)

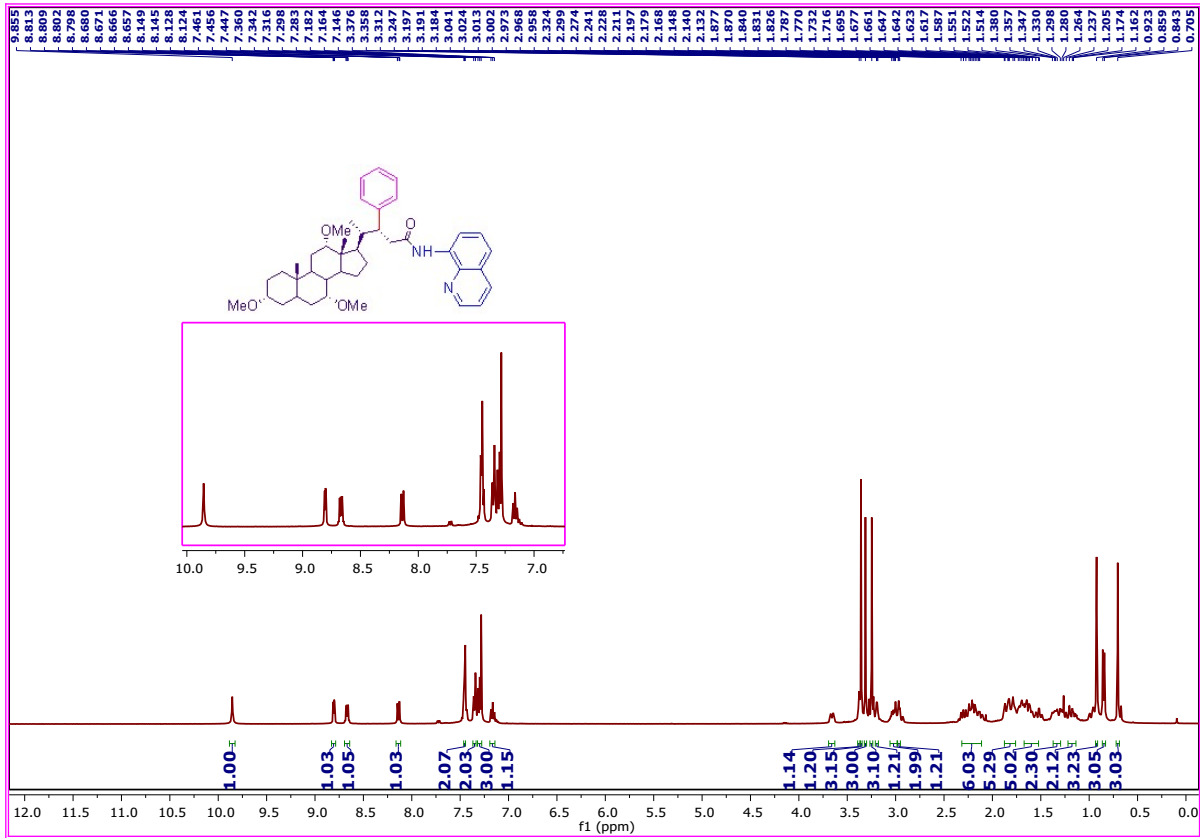

### <sup>13</sup>C NMR of 3aa (400 MHz, CDCl<sub>3</sub>)

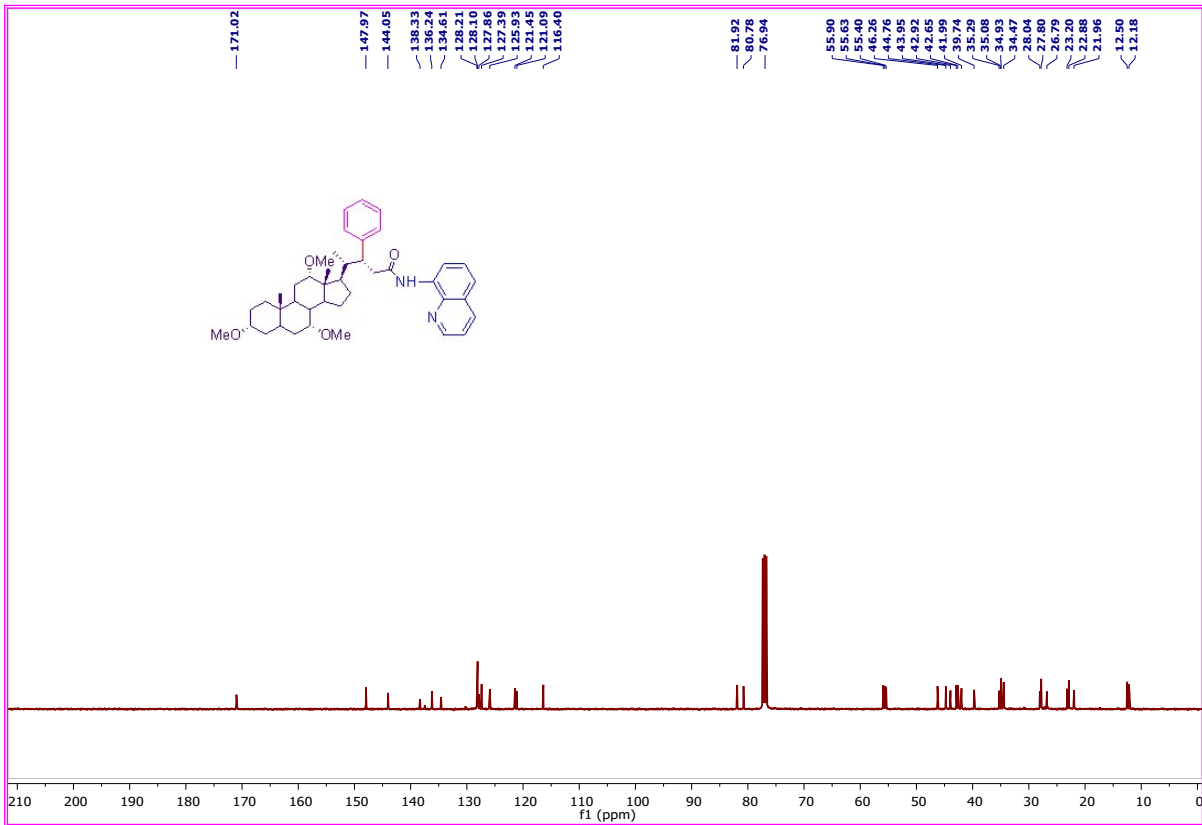

**<sup>1</sup>H NMR of 3ab (400 MHz, CDCl<sub>3</sub>)**

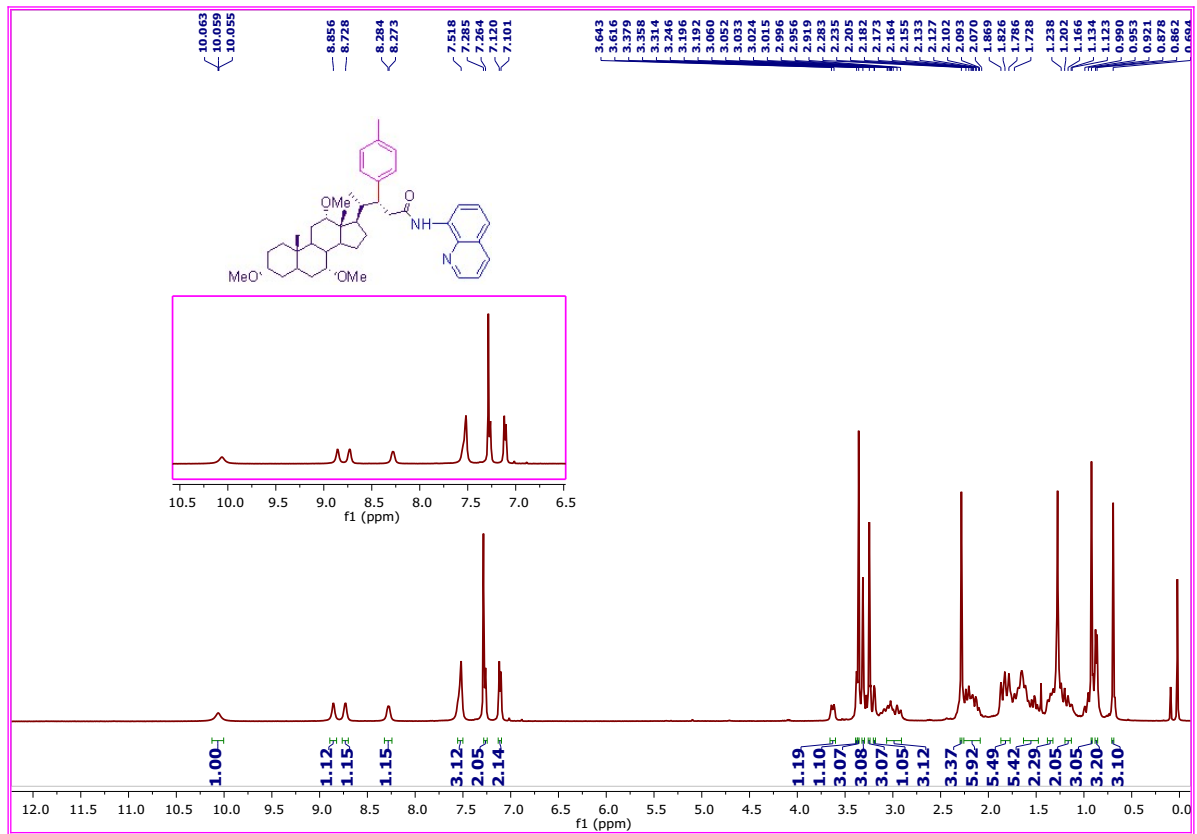

**<sup>13</sup>C NMR of 3ab (400 MHz, CDCl<sub>3</sub>)**

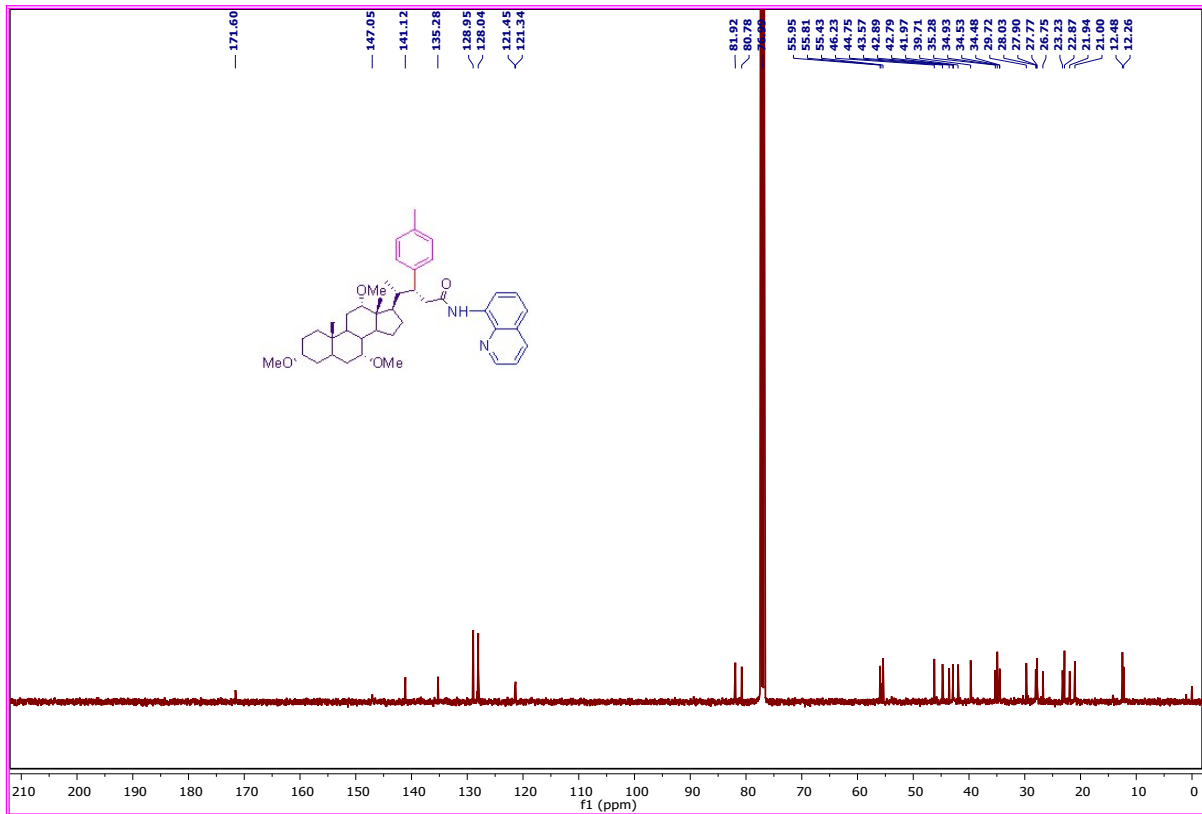

### <sup>1</sup>H NMR of 3ac (400 MHz, CDCl<sub>3</sub>)

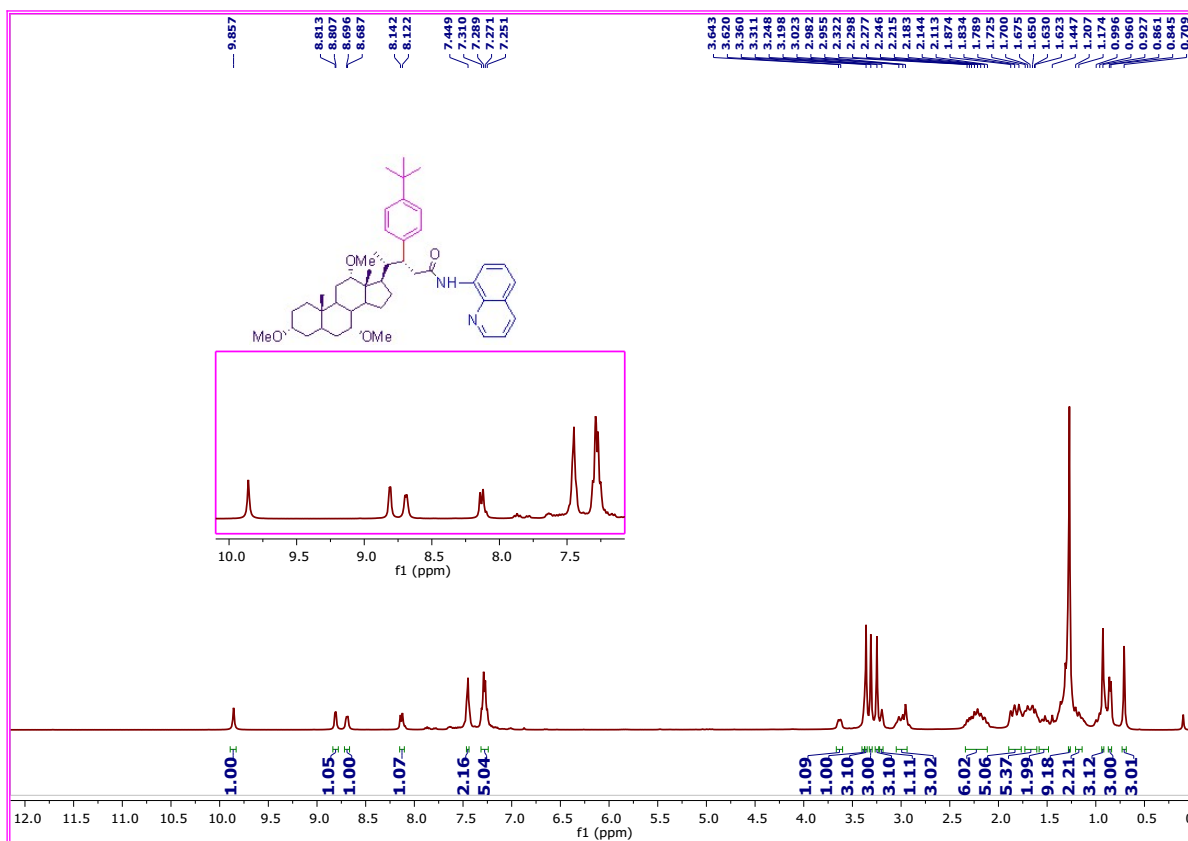

### <sup>13</sup>C NMR of 3ac (400 MHz, CDCl<sub>3</sub>)

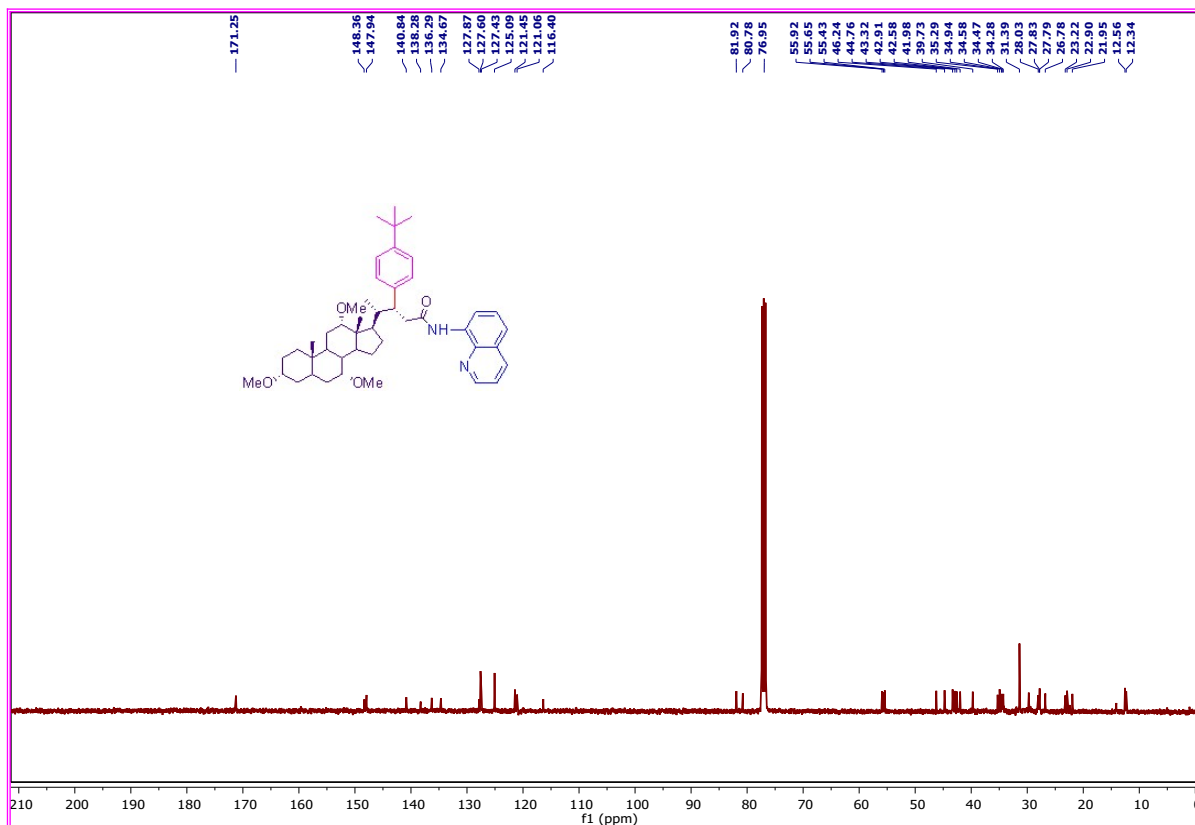

### <sup>1</sup>H NMR of 3ad (400 MHz, CDCl<sub>3</sub>)

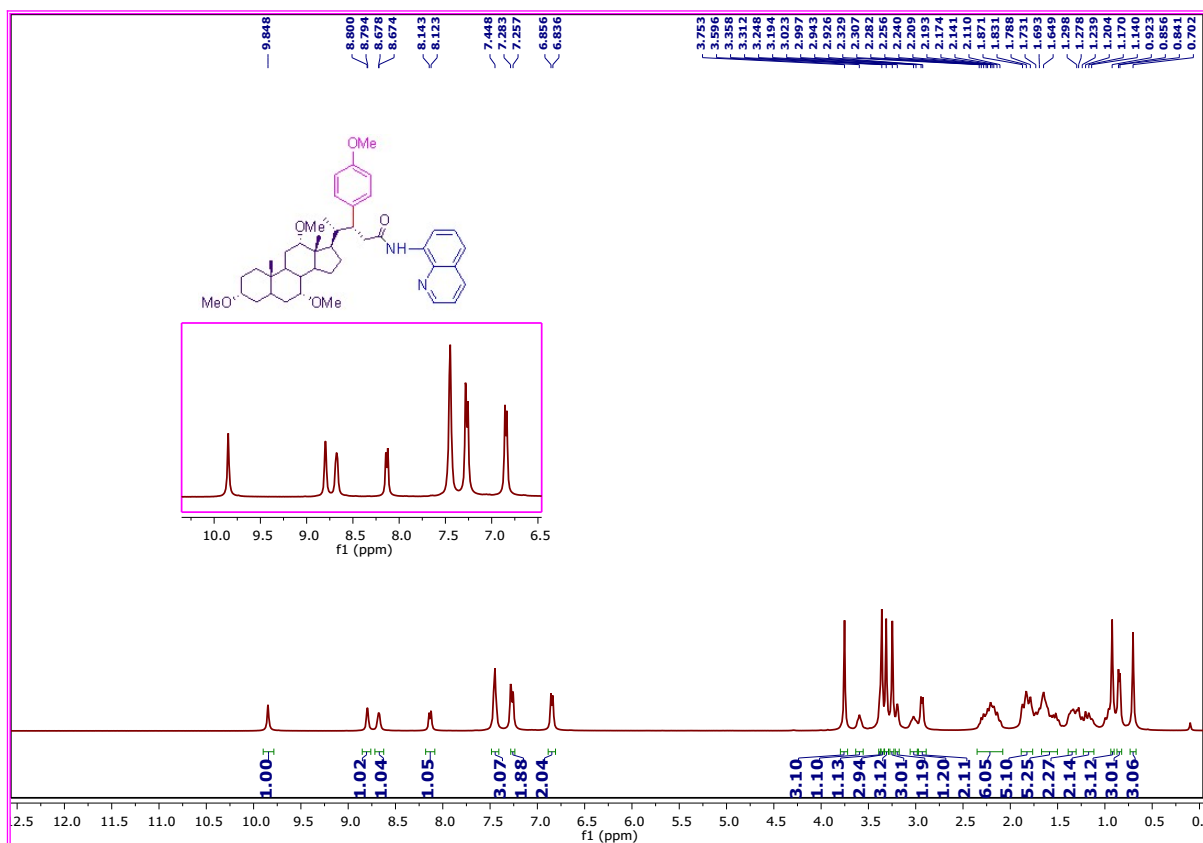

### <sup>13</sup>C NMR of 3ad (400 MHz, CDCl<sub>3</sub>)

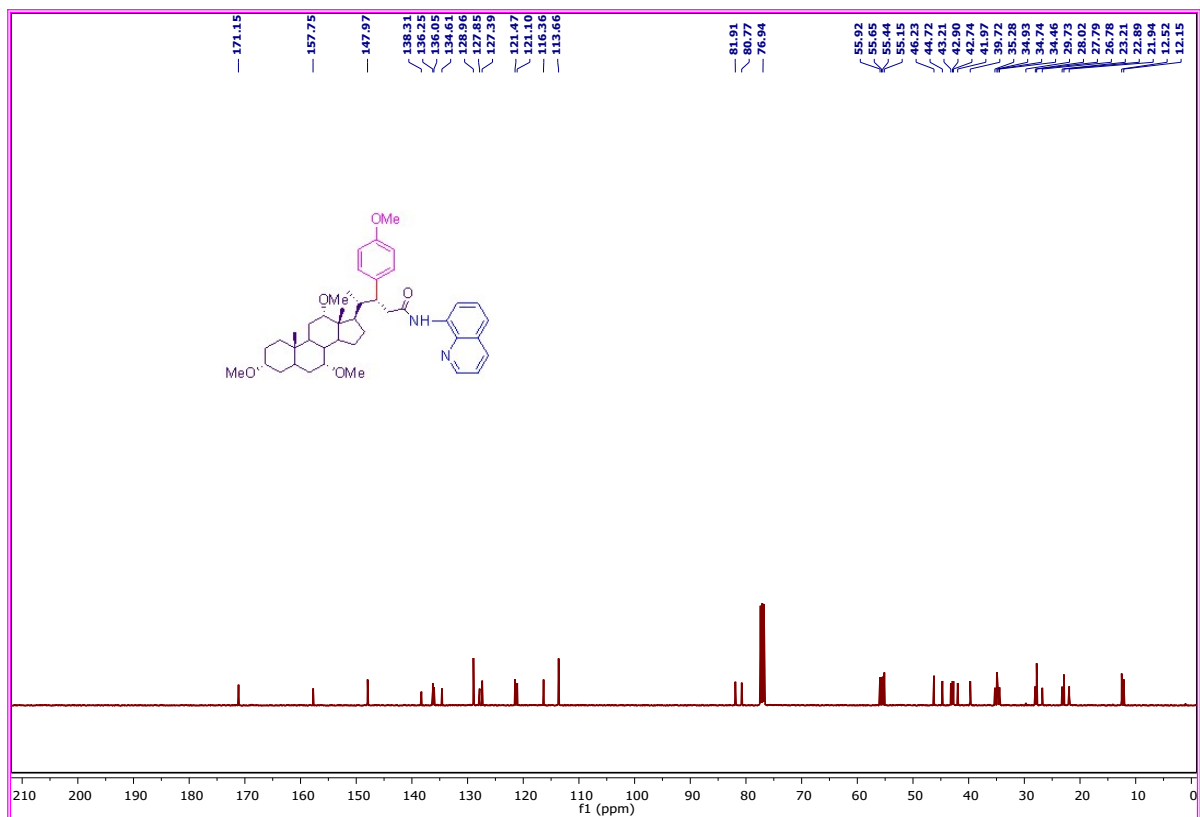



### <sup>1</sup>H NMR of 3ae (400 MHz, CDCl<sub>3</sub>)

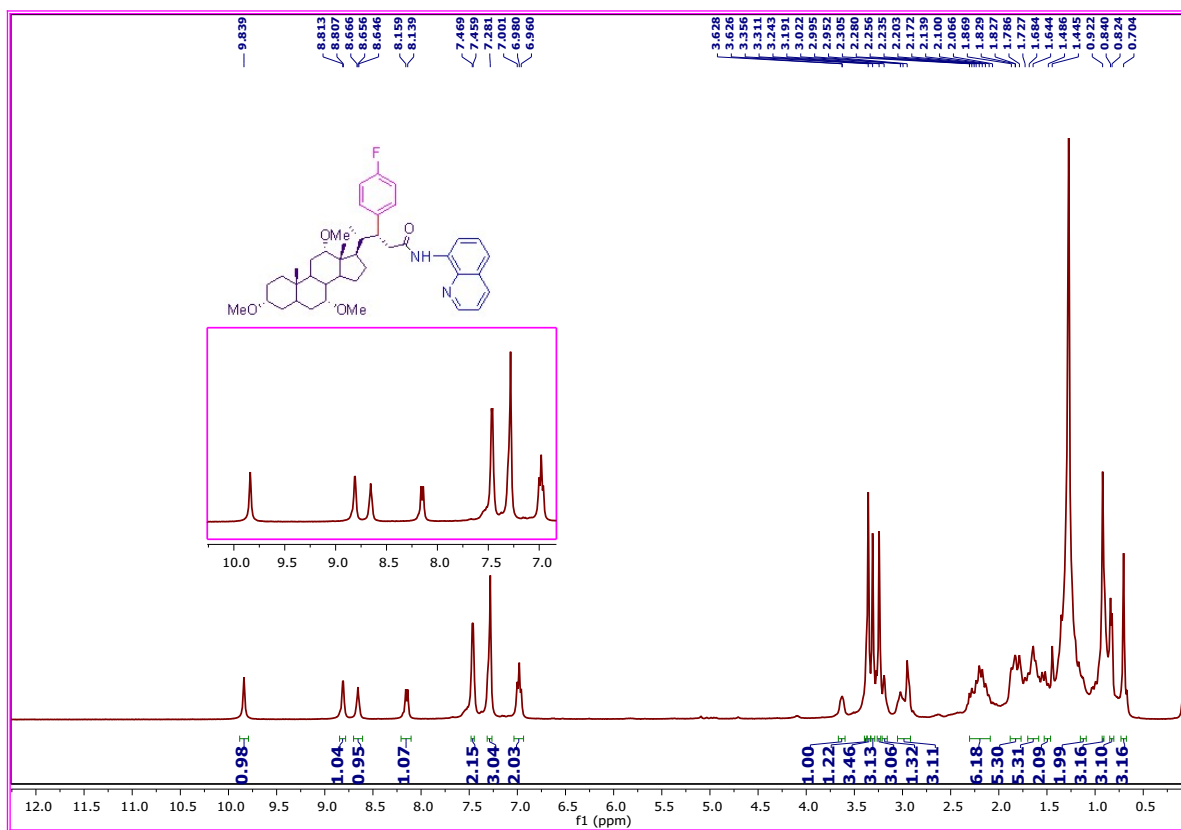

### <sup>13</sup>C NMR of 3ae (400 MHz, CDCl<sub>3</sub>)

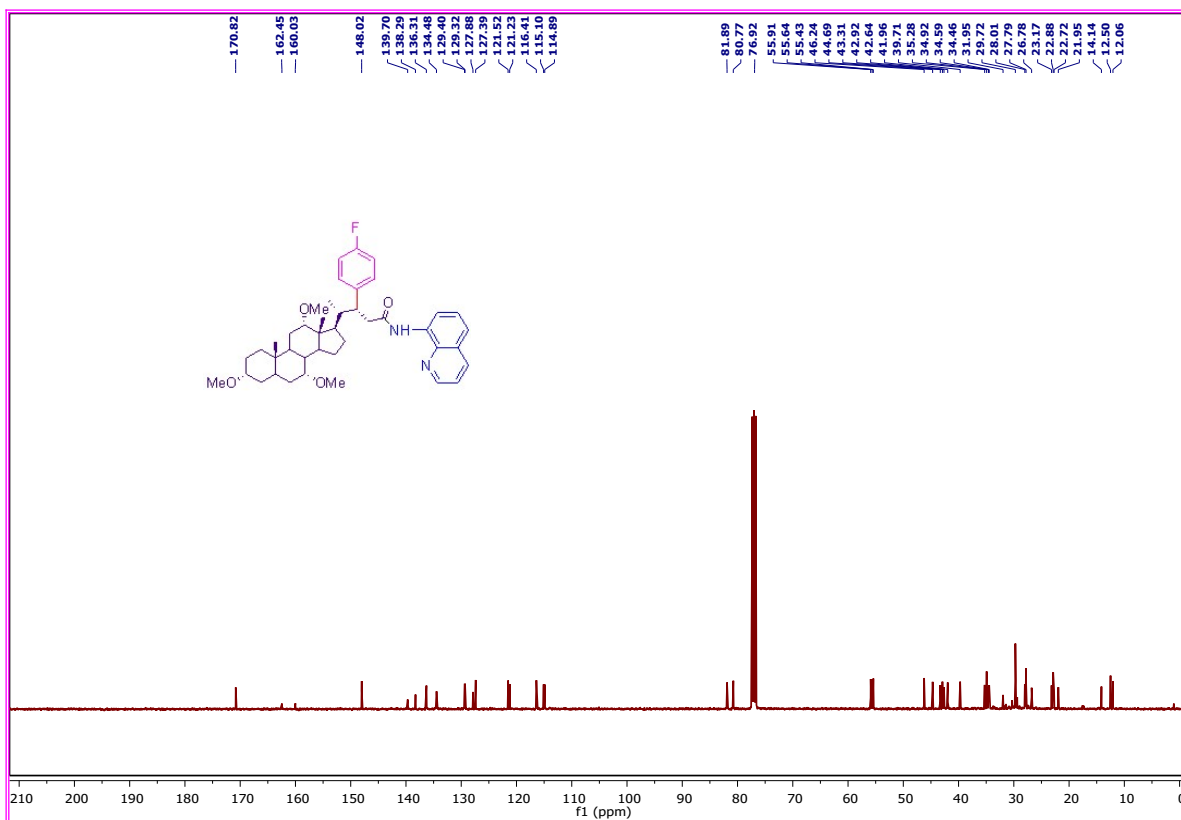

### <sup>1</sup>H NMR of 3af (400 MHz, CDCl<sub>3</sub>)

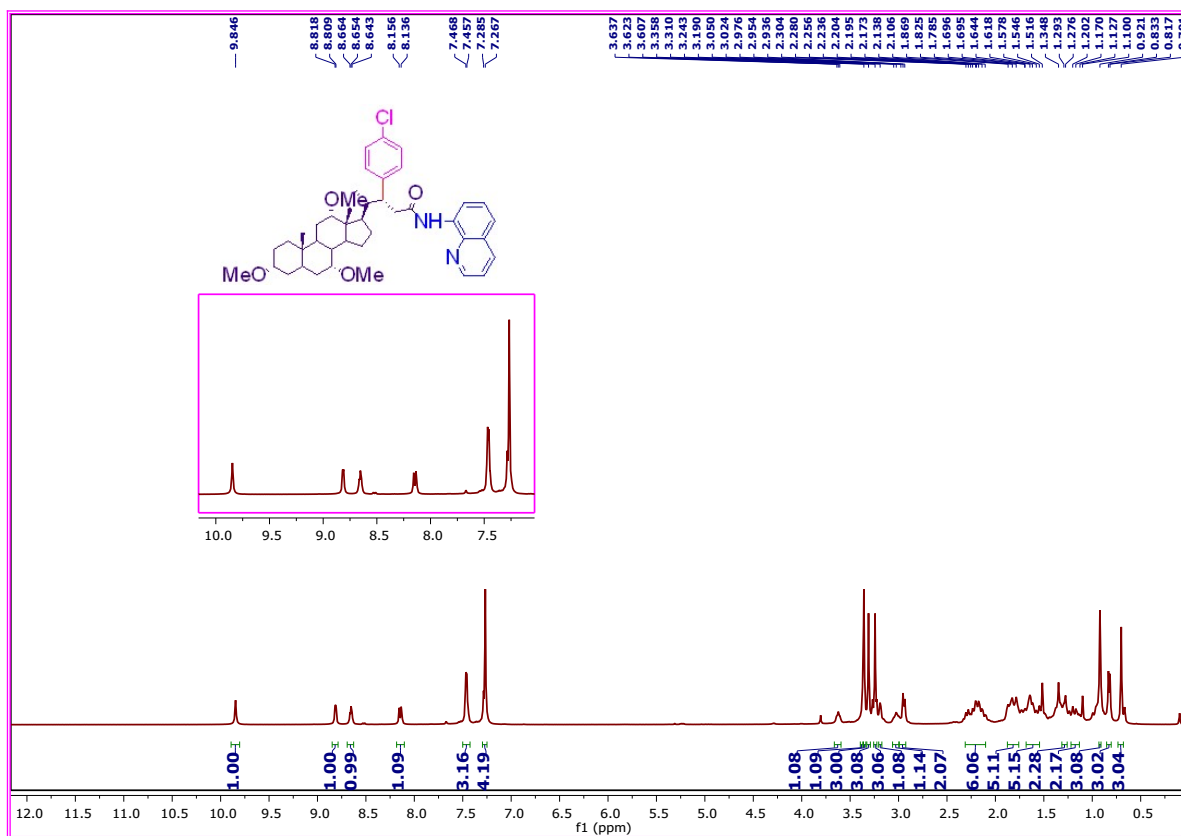

### <sup>13</sup>C NMR of 3af (400 MHz, CDCl<sub>3</sub>)

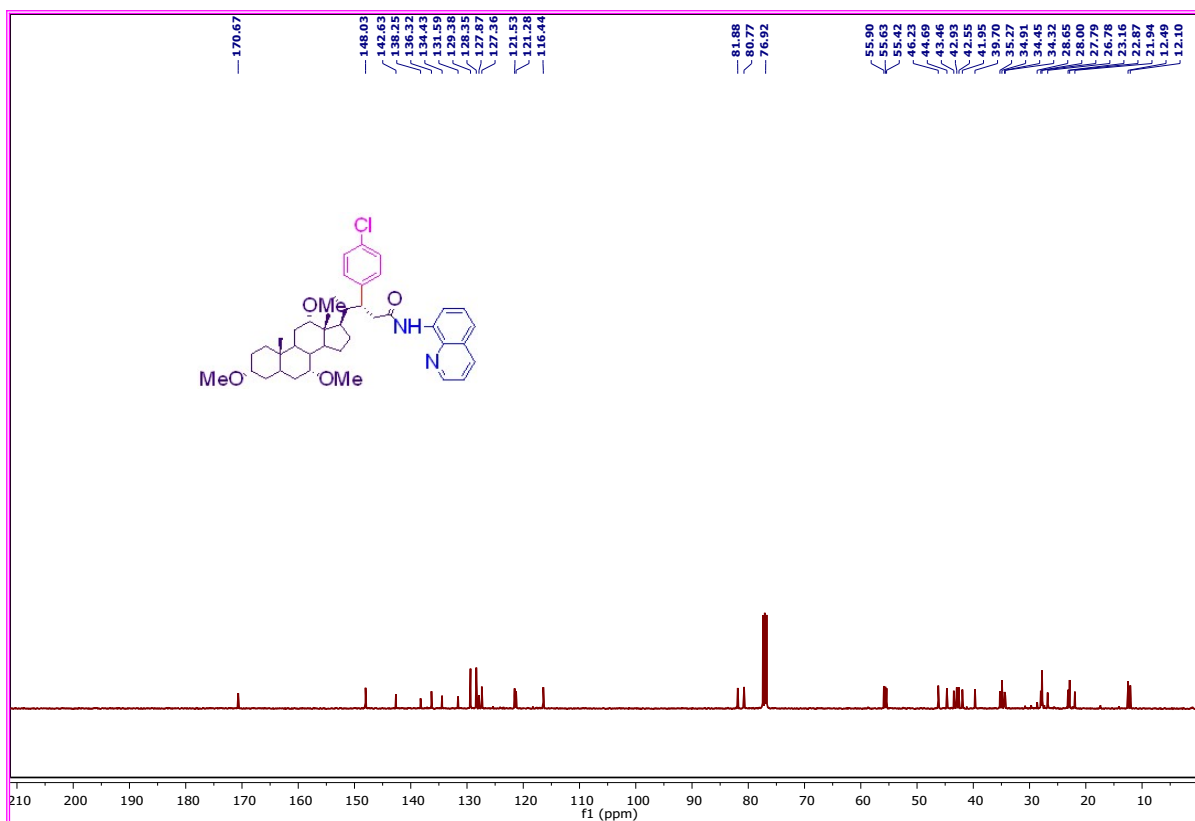

**<sup>1</sup>H NMR of 3ah (400 MHz, CDCl<sub>3</sub>)**

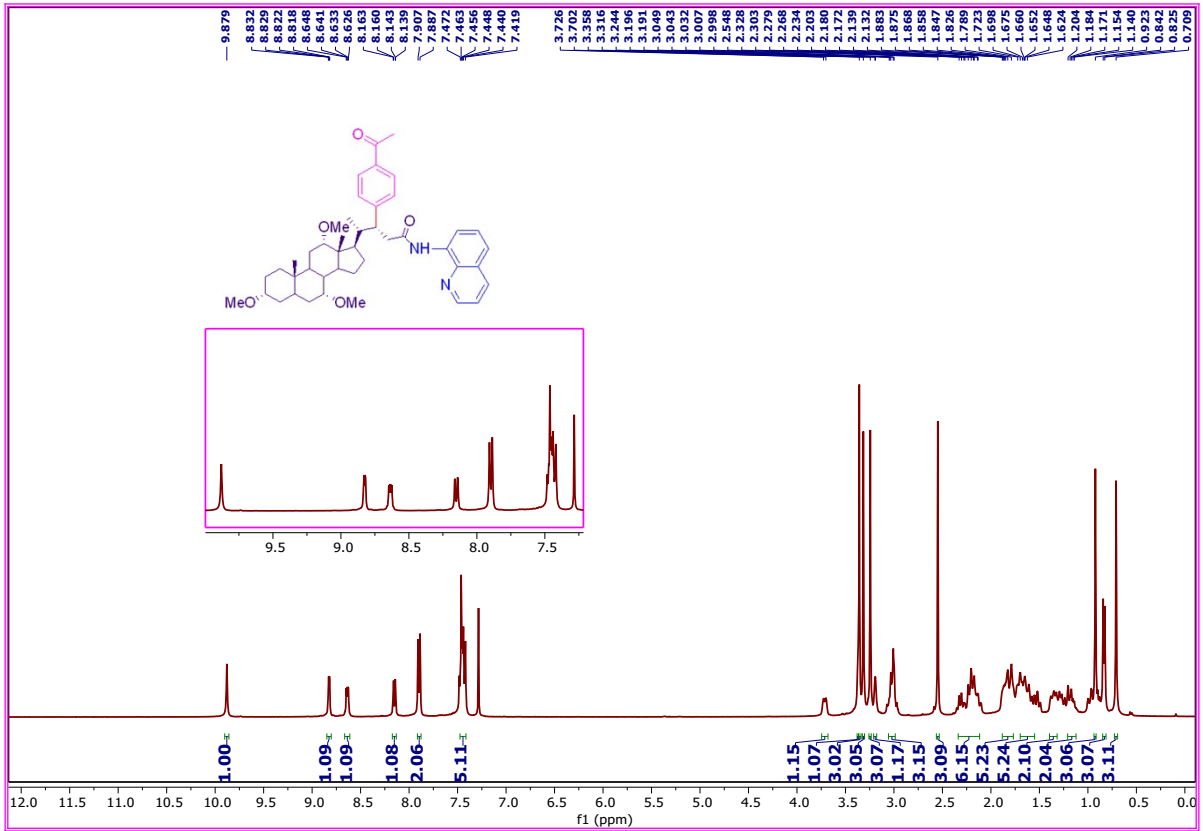

**<sup>13</sup>C NMR of 3ah (400 MHz, CDCl<sub>3</sub>)**

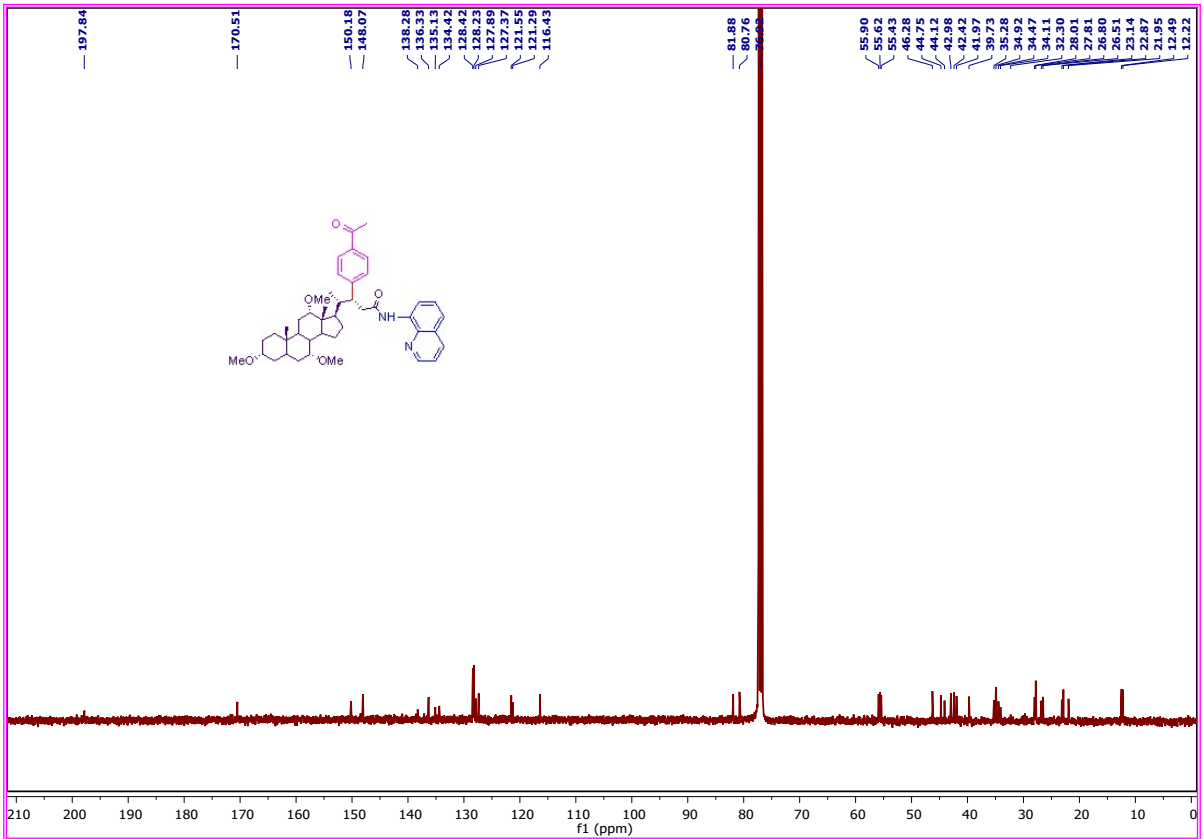

### <sup>1</sup>H NMR of 3ai (400 MHz, CDCl<sub>3</sub>)

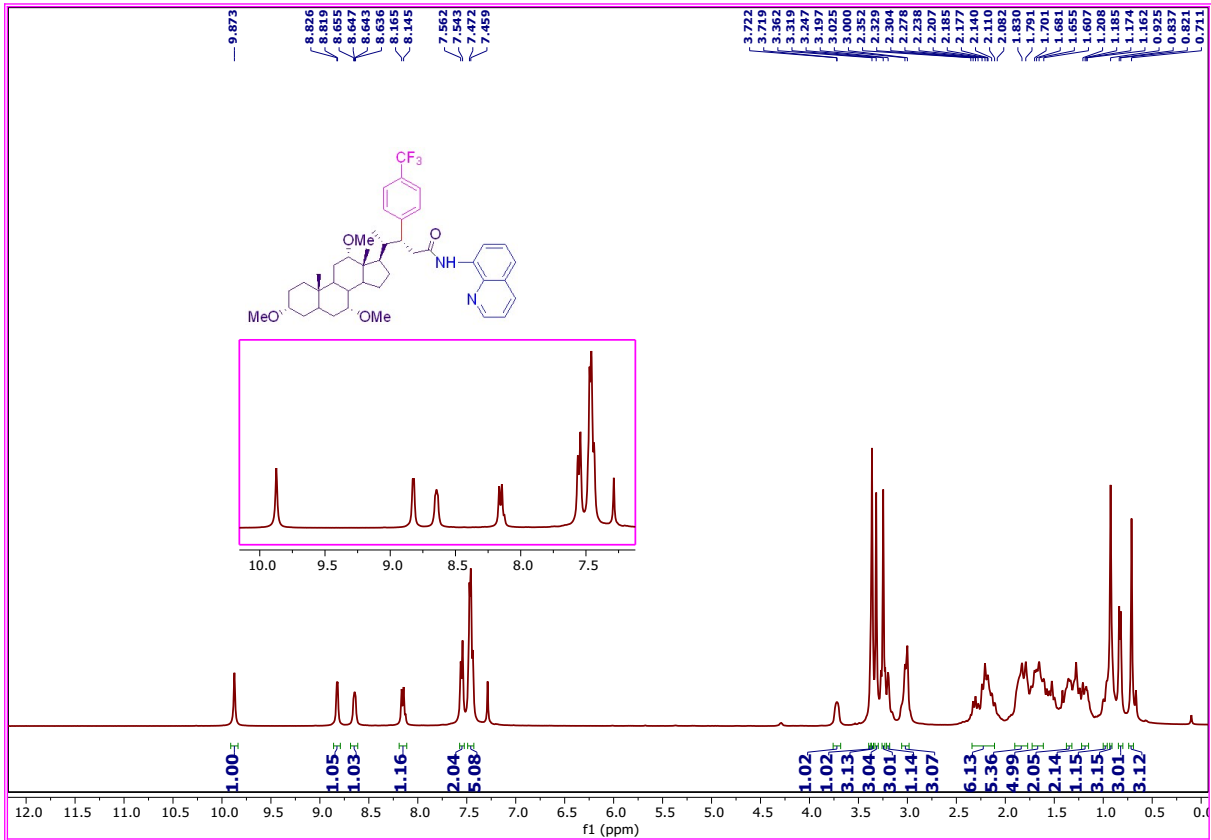

### <sup>13</sup>C NMR of 3ai (400 MHz, CDCl<sub>3</sub>)

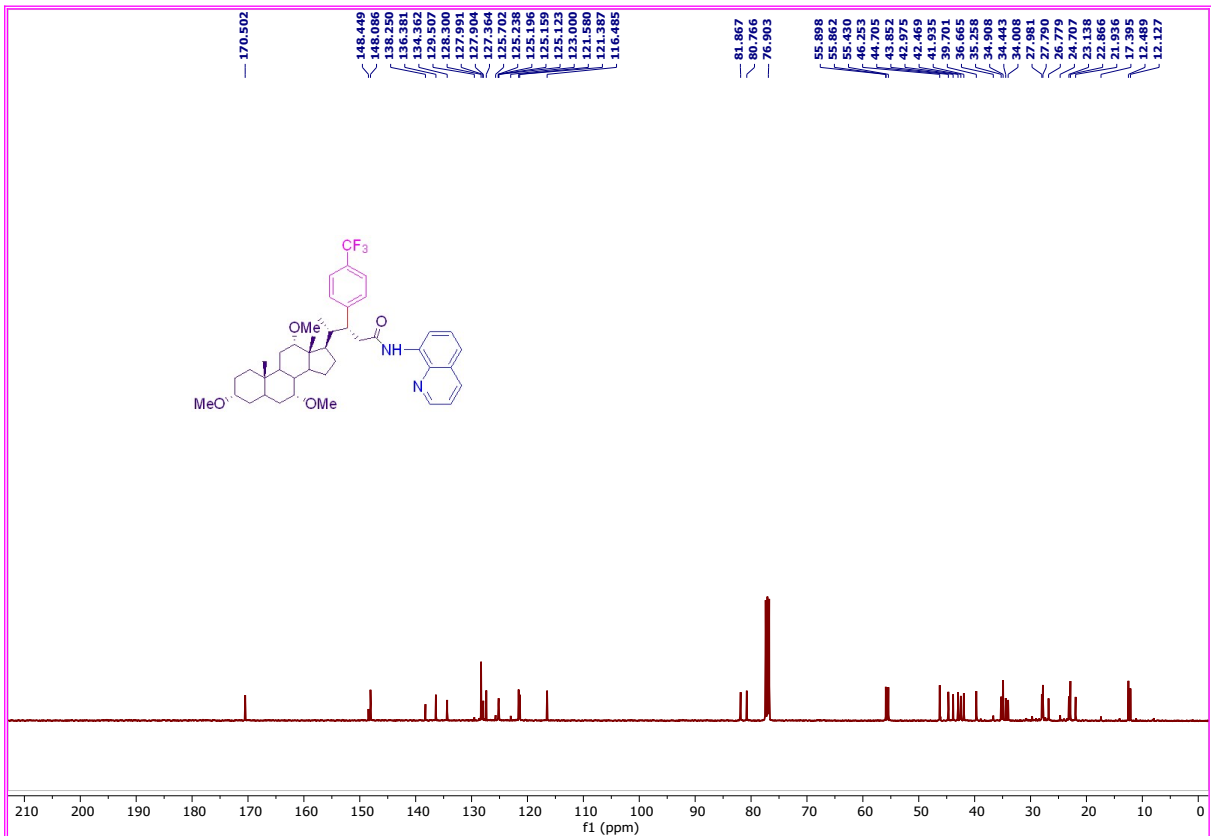

### <sup>1</sup>H NMR of 3aj (400 MHz, CDCl<sub>3</sub>)

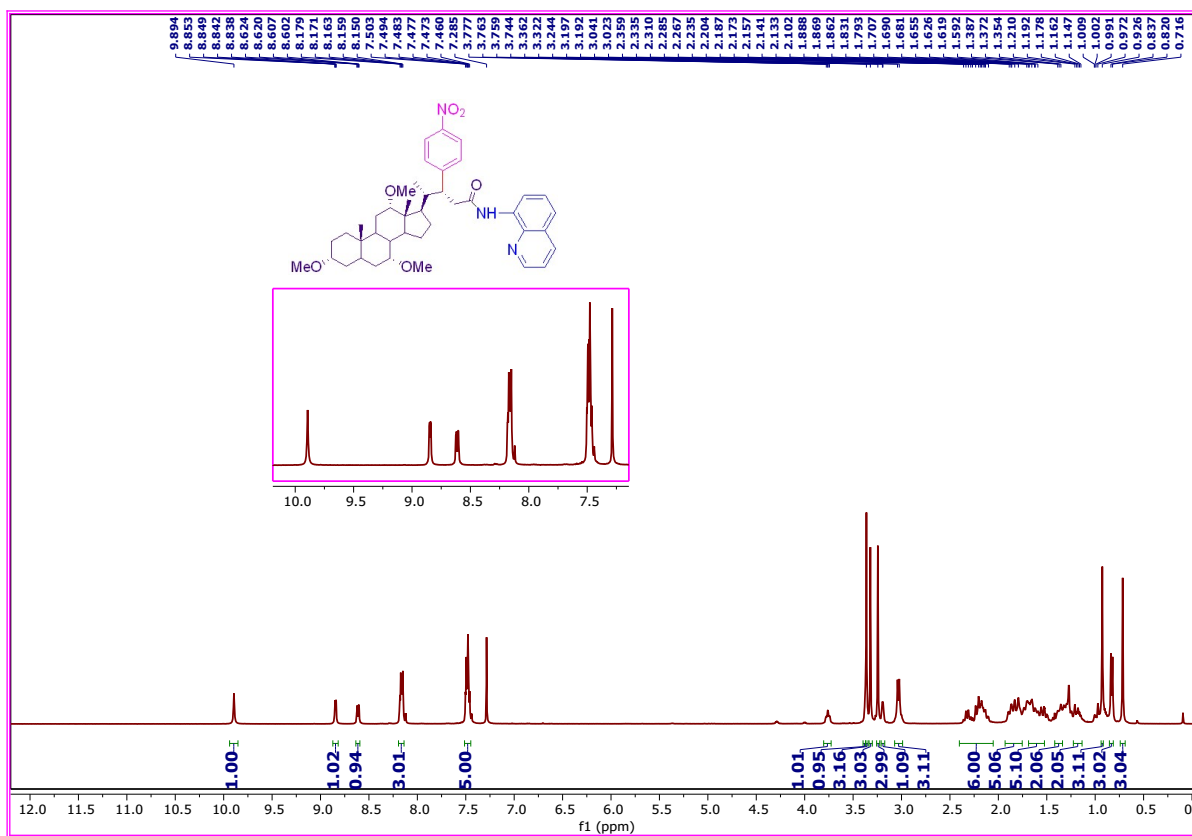

### <sup>13</sup>C NMR of 3aj (400 MHz, CDCl<sub>3</sub>)

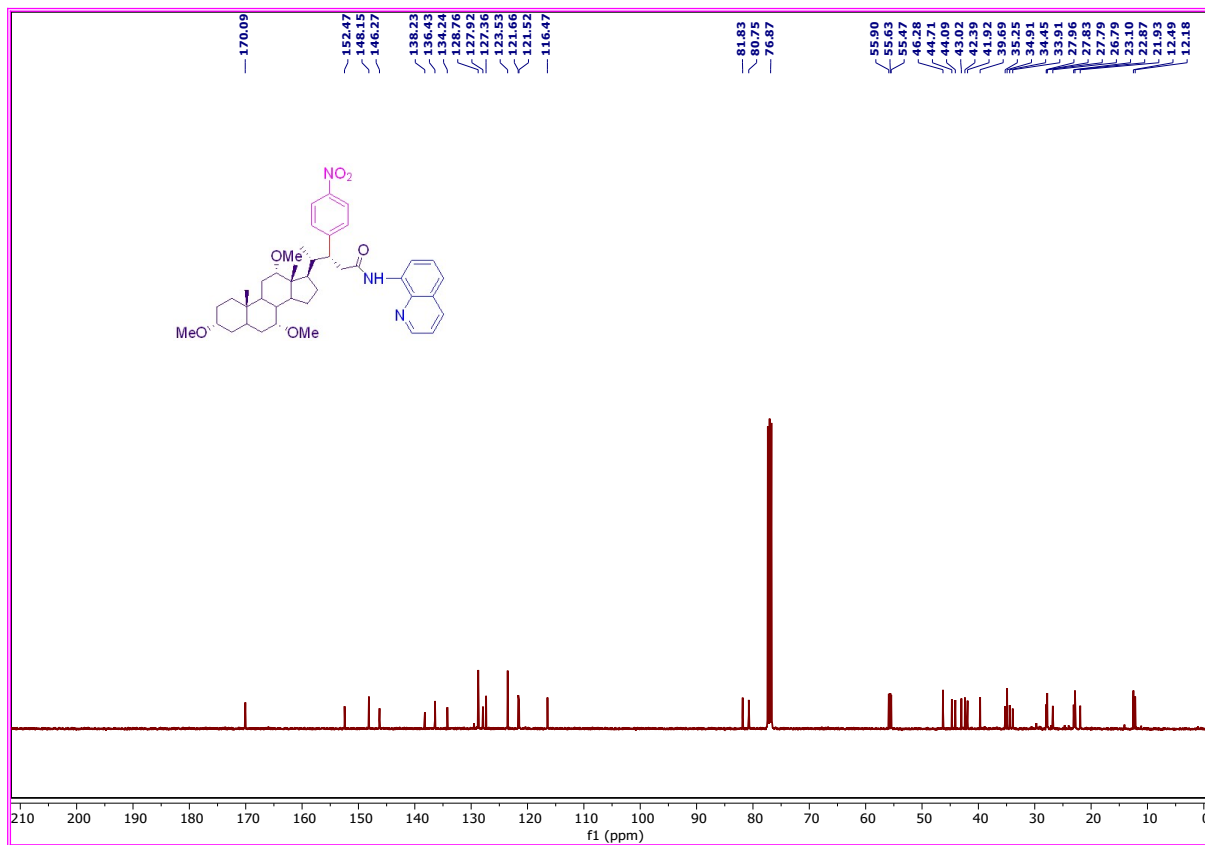

### <sup>1</sup>H NMR of 3ak (400 MHz, CDCl<sub>3</sub>)

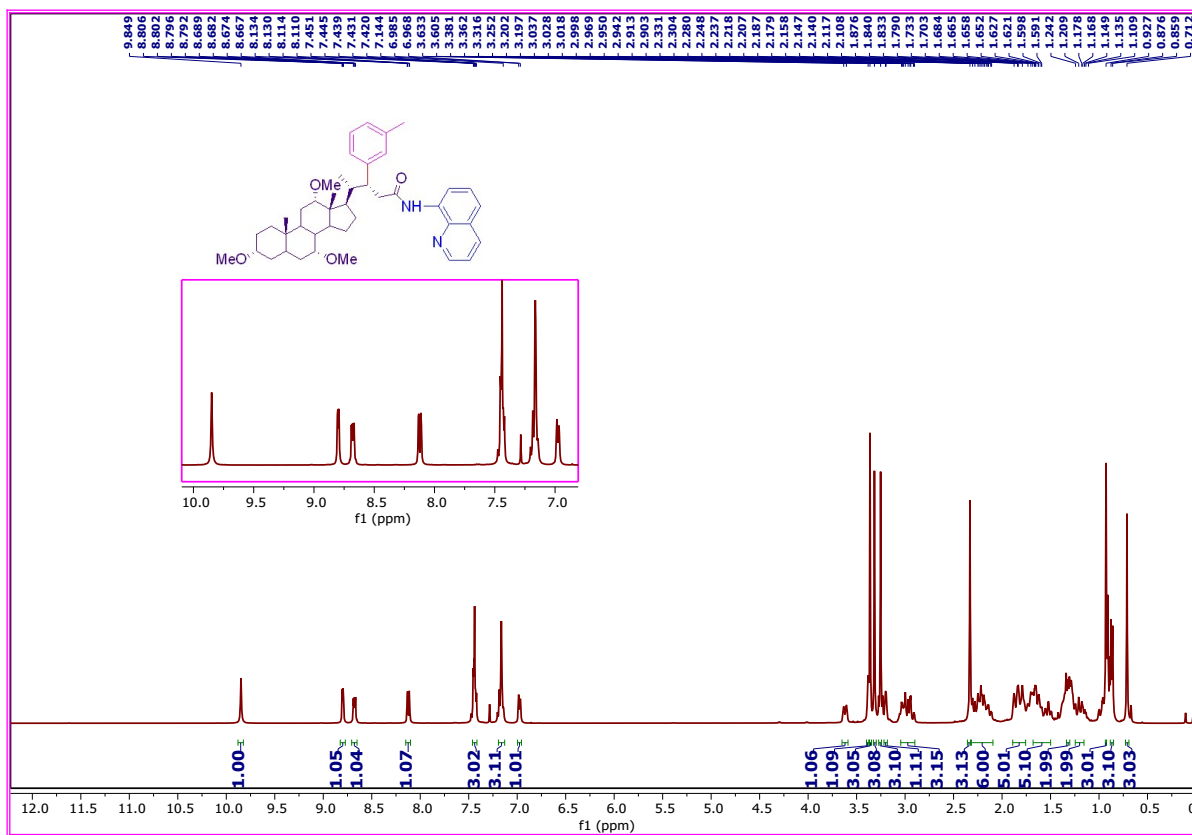

### <sup>13</sup>C NMR of 3ak (400 MHz, CDCl<sub>3</sub>)

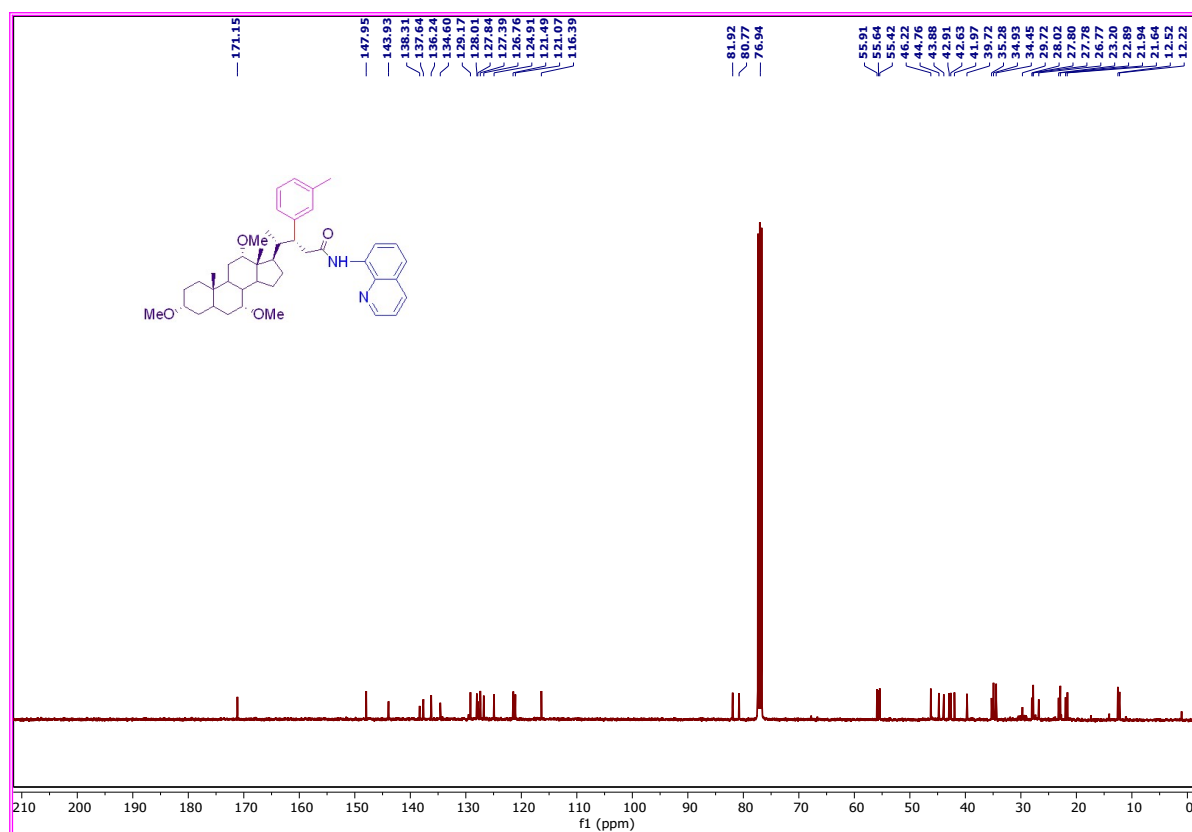

### <sup>1</sup>H NMR of 3al (400 MHz, CDCl<sub>3</sub>)

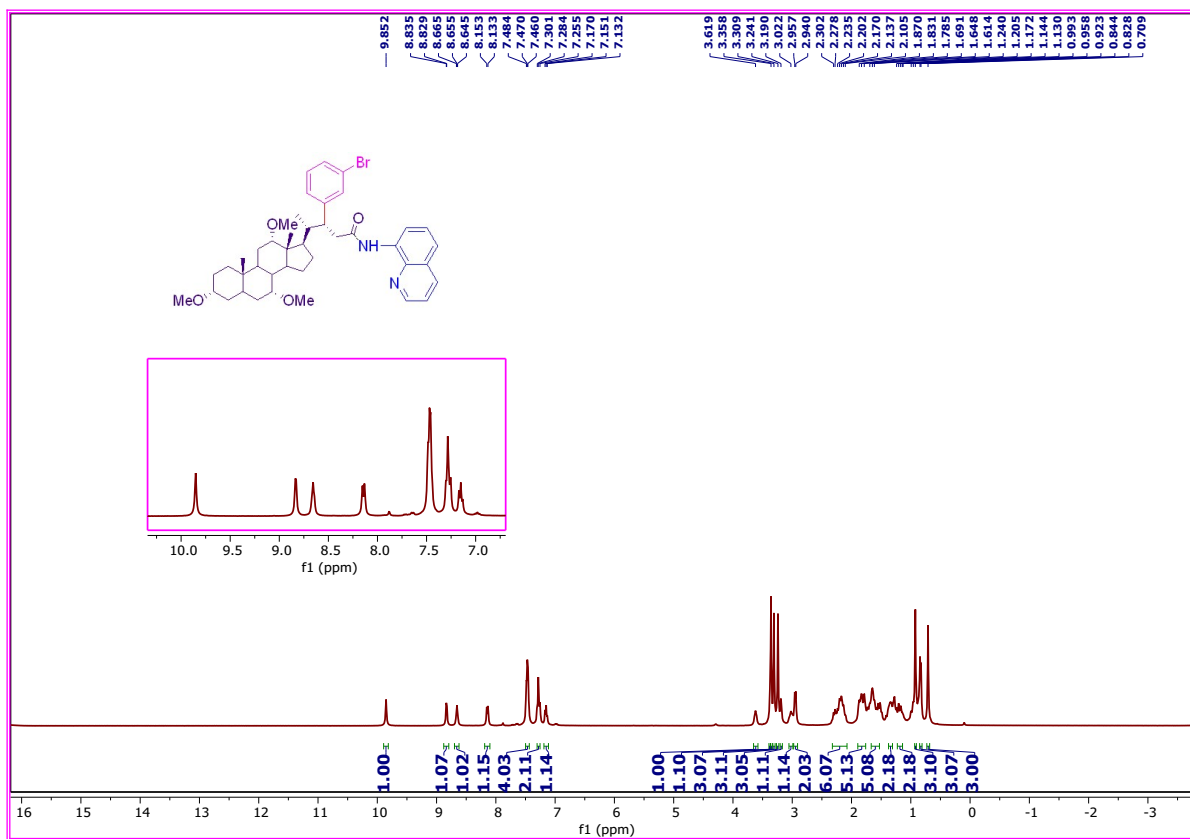

### <sup>13</sup>C NMR of 3al (400 MHz, CDCl<sub>3</sub>)

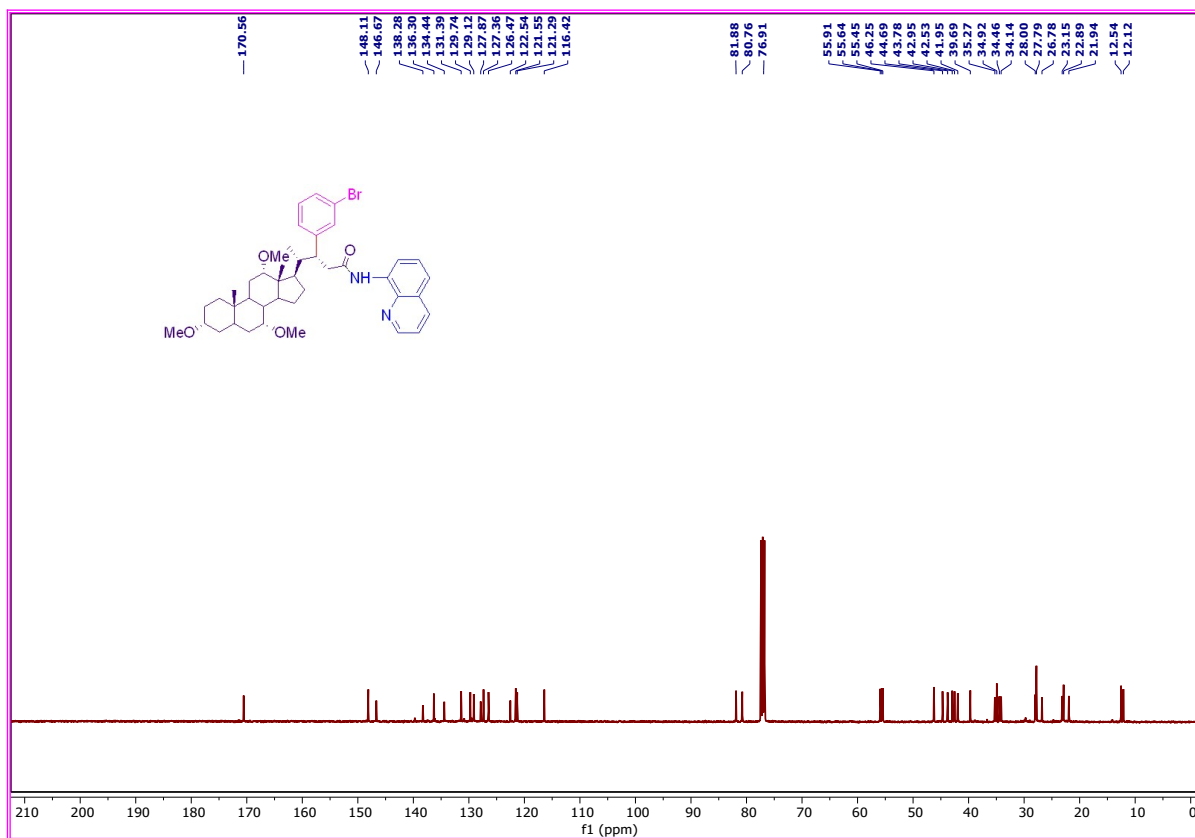

### <sup>1</sup>H NMR of 3aq (400 MHz, CDCl<sub>3</sub>)

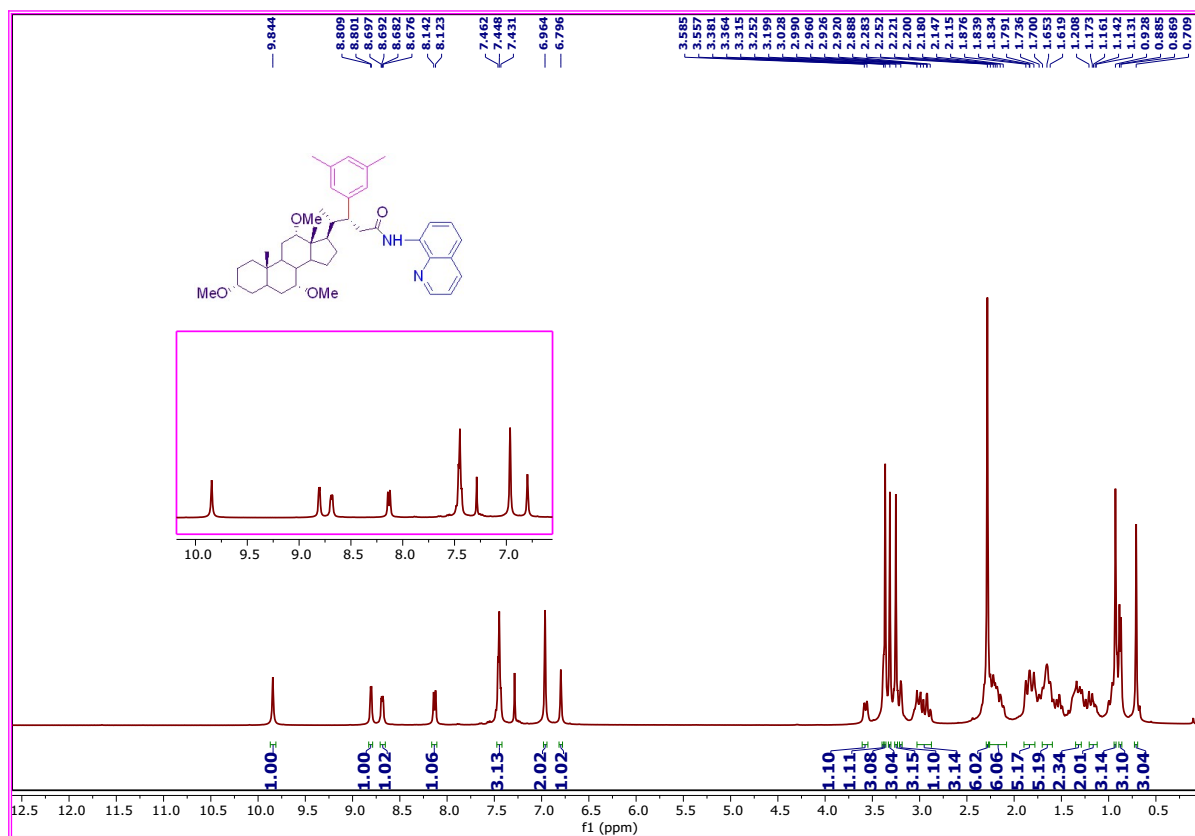

### <sup>13</sup>C NMR of 3aq (400 MHz, CDCl<sub>3</sub>)

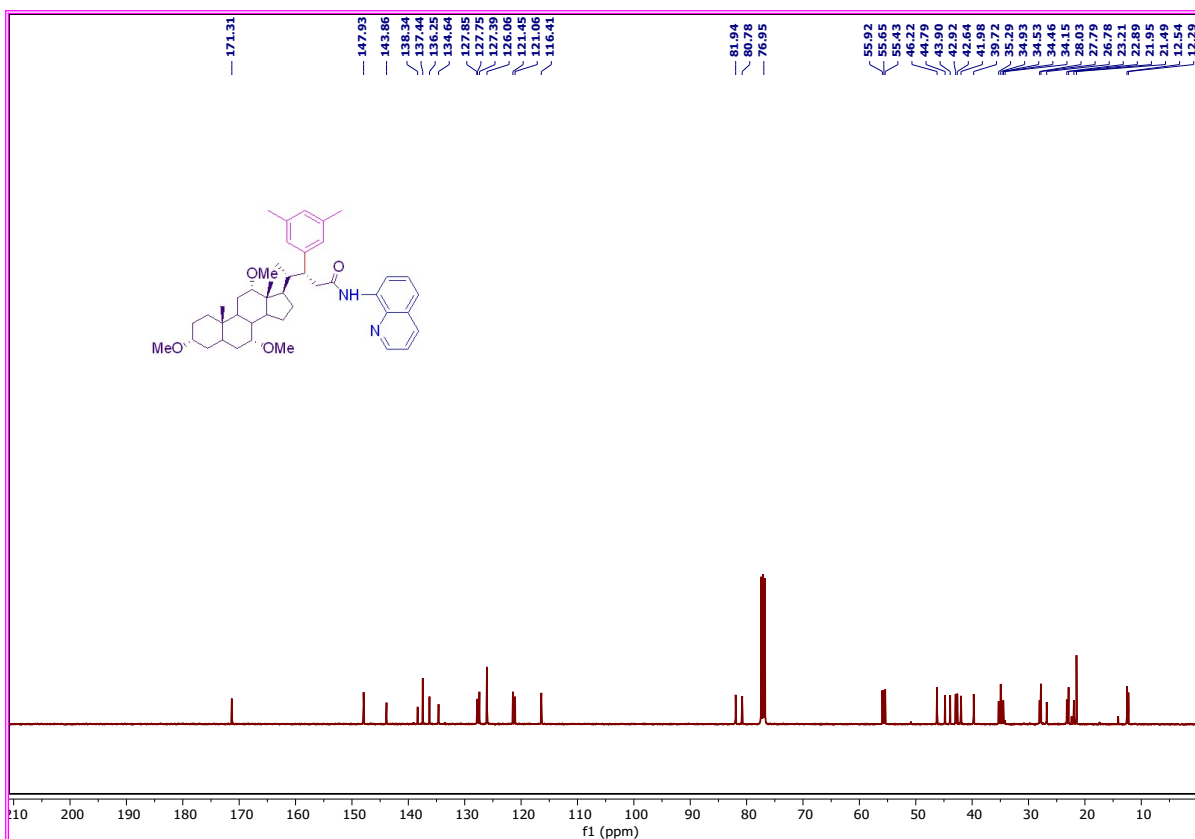



### <sup>1</sup>H NMR of 3ar (400 MHz, CDCl<sub>3</sub>)

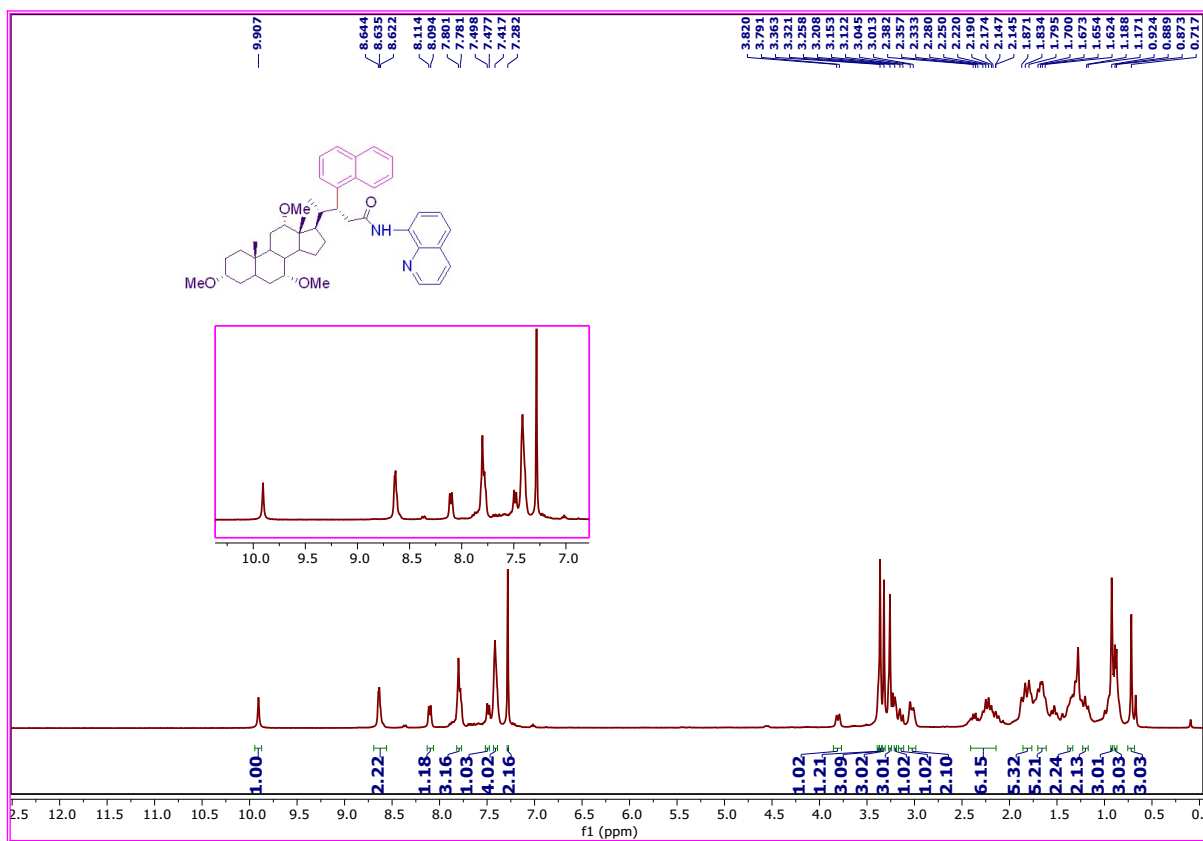

### <sup>13</sup>C NMR of 3ar (400 MHz, CDCl<sub>3</sub>)

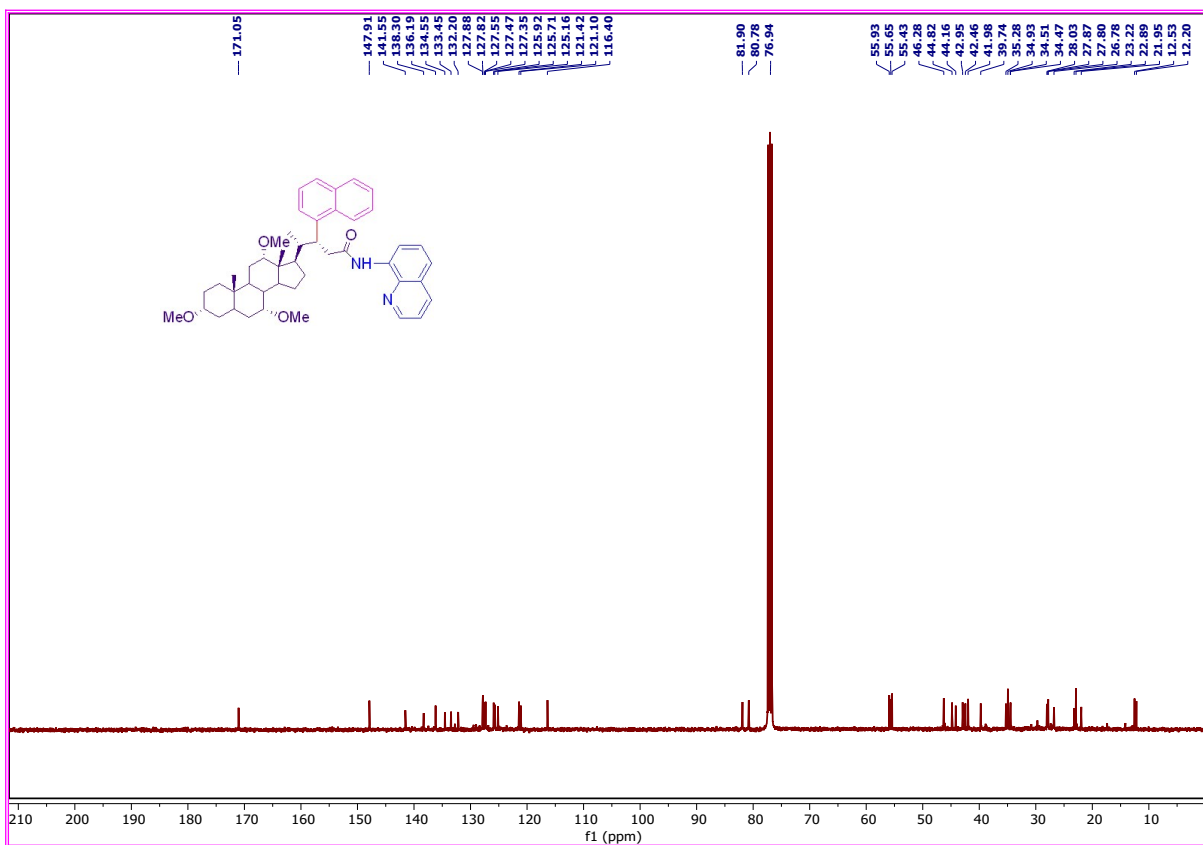

### <sup>1</sup>H NMR of 3as (400 MHz, CDCl<sub>3</sub>)

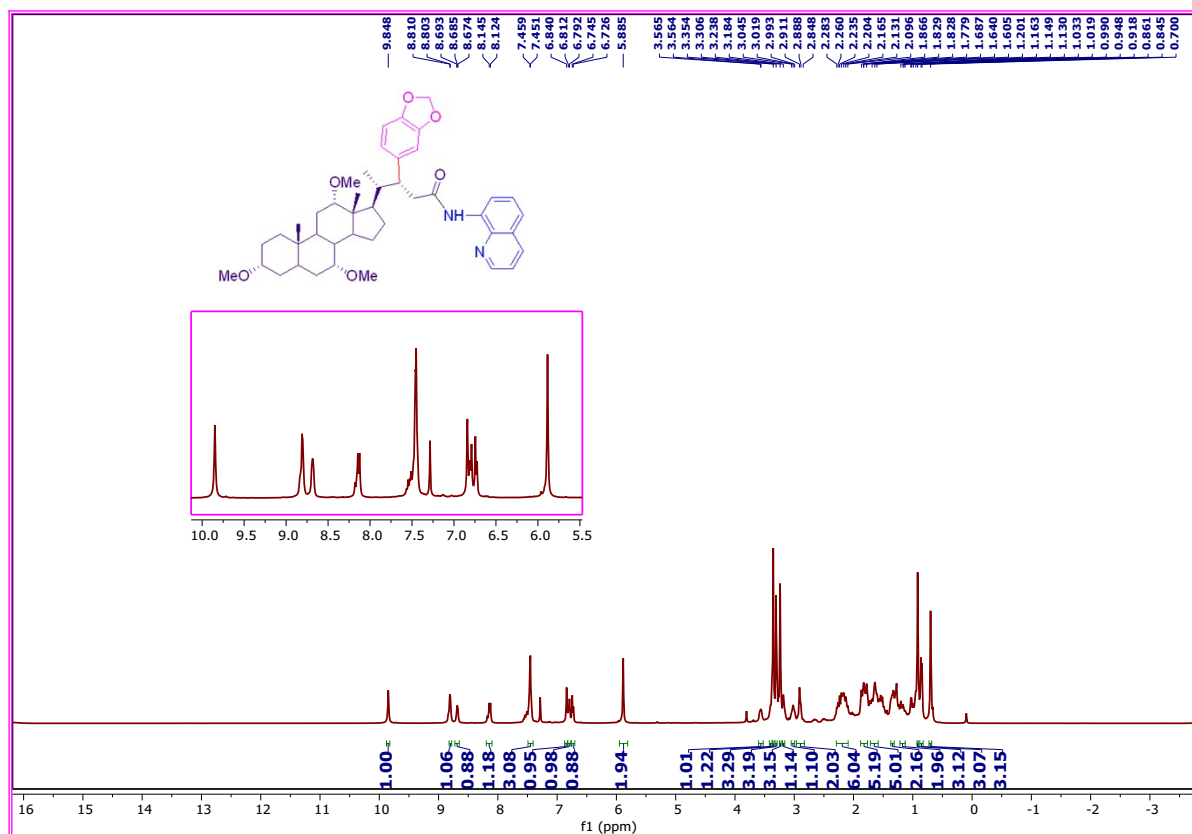

### <sup>13</sup>C NMR of 3as (400 MHz, CDCl<sub>3</sub>)

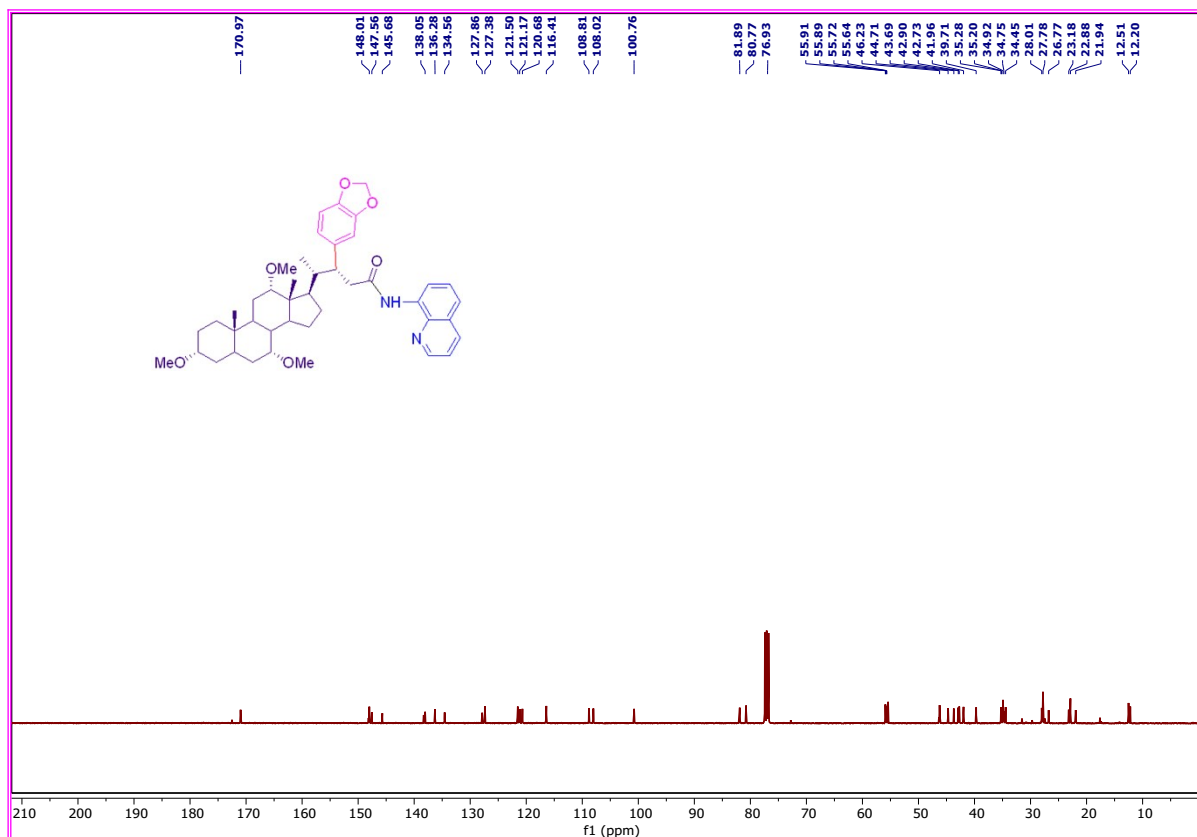

### <sup>1</sup>H NMR of 3ax (400 MHz, CDCl<sub>3</sub>)

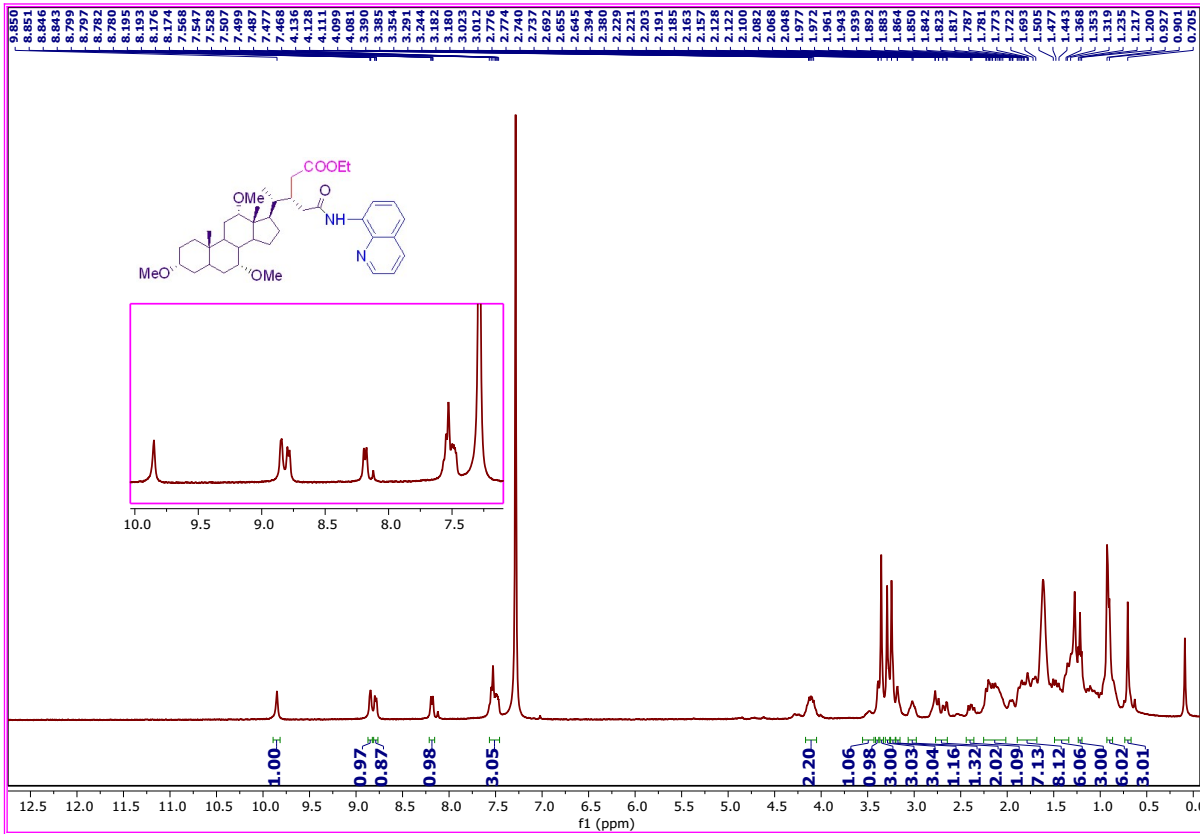

### <sup>13</sup>C NMR of 3ax (400 MHz, CDCl<sub>3</sub>)

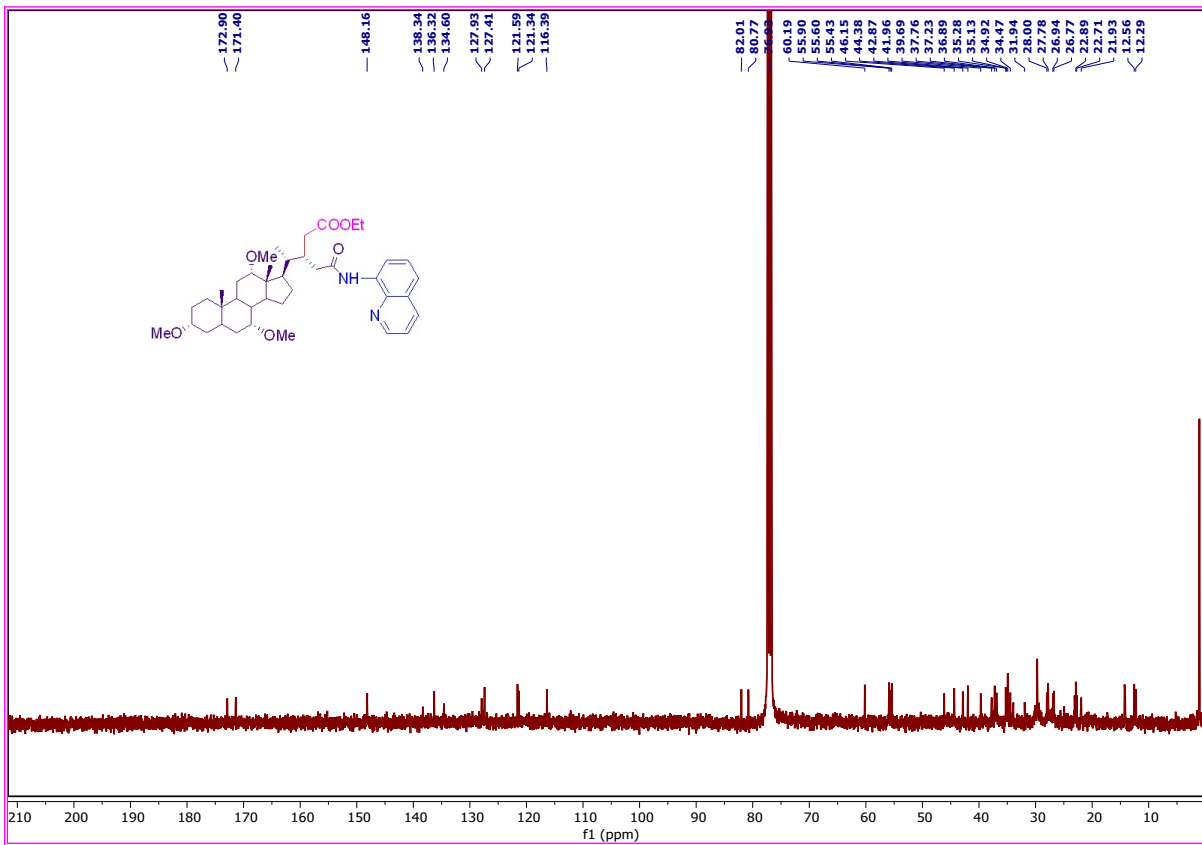

### <sup>1</sup>H NMR of 3ba (400 MHz, CDCl<sub>3</sub>)

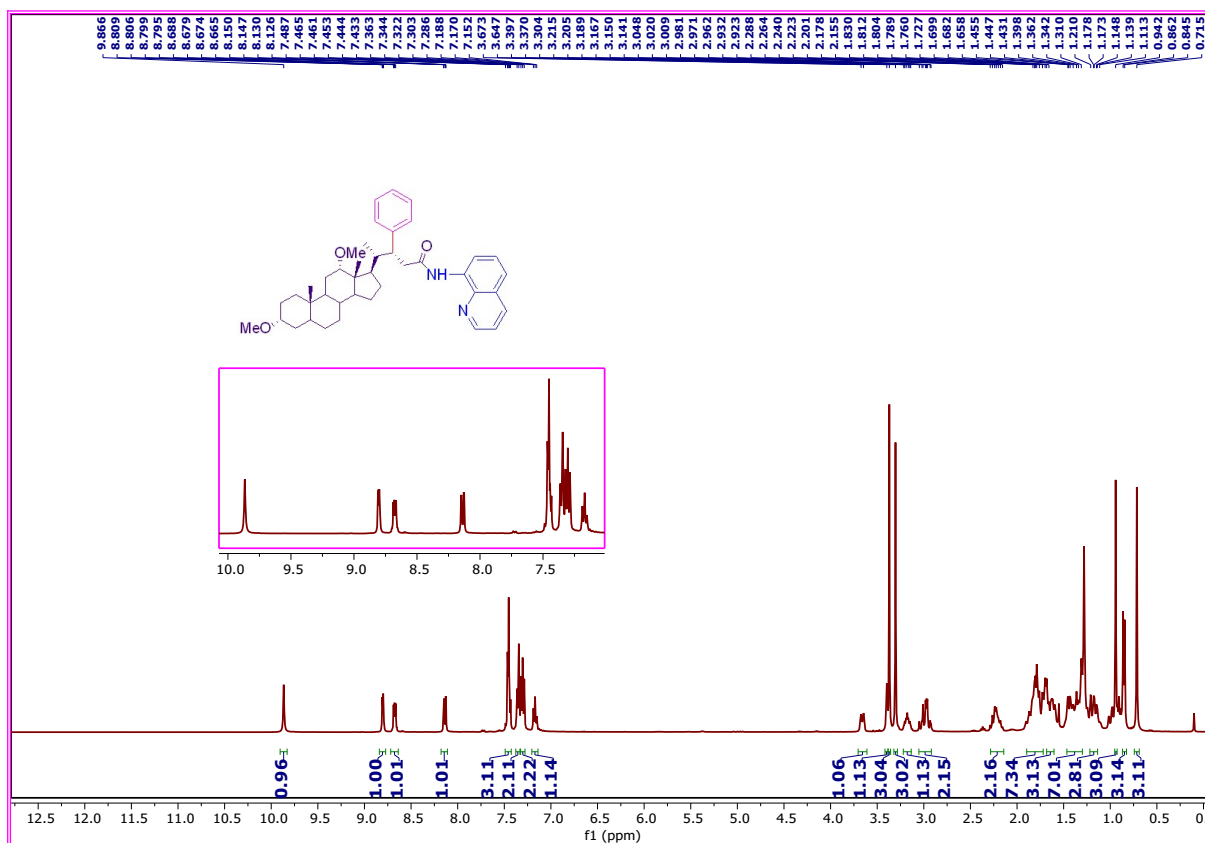

### <sup>13</sup>C NMR of 3ba (400 MHz, CDCl<sub>3</sub>)

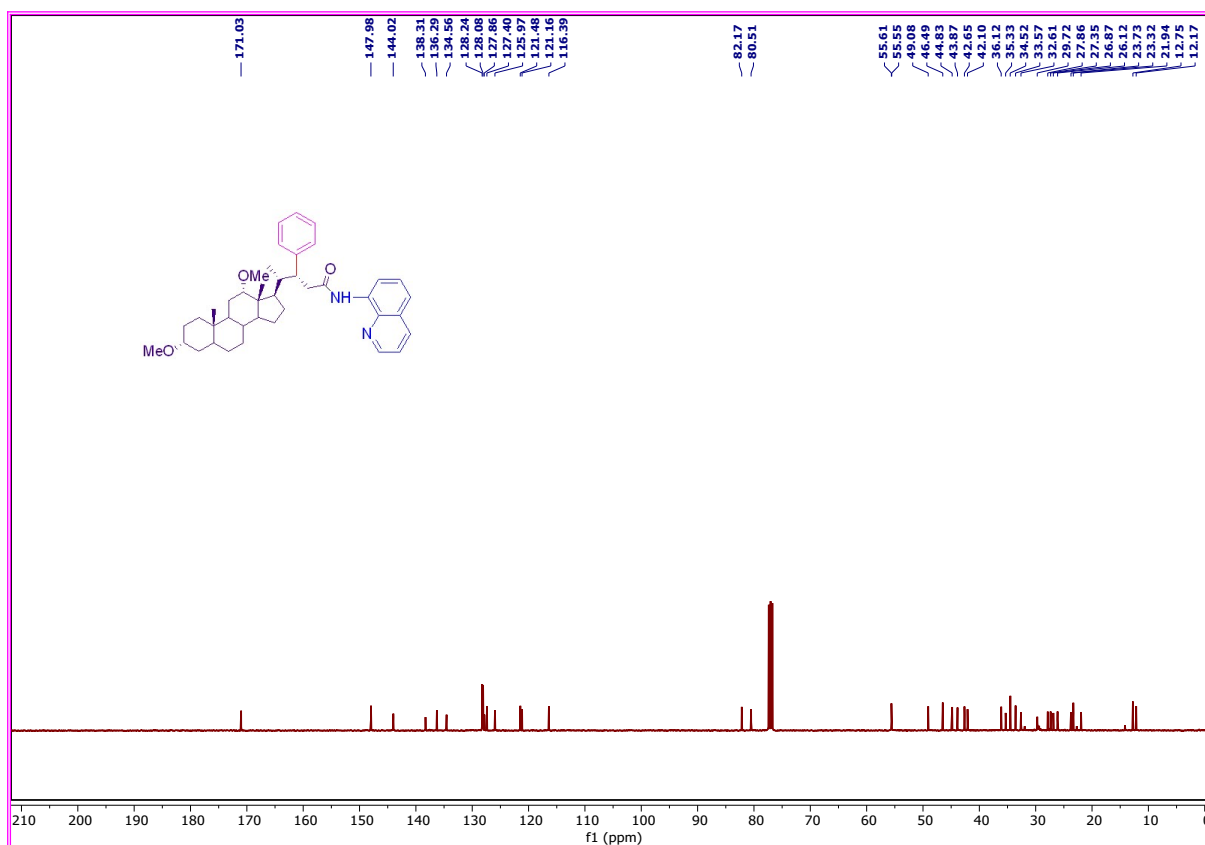

### <sup>1</sup>H NMR of 3bb (400 MHz, CDCl<sub>3</sub>)

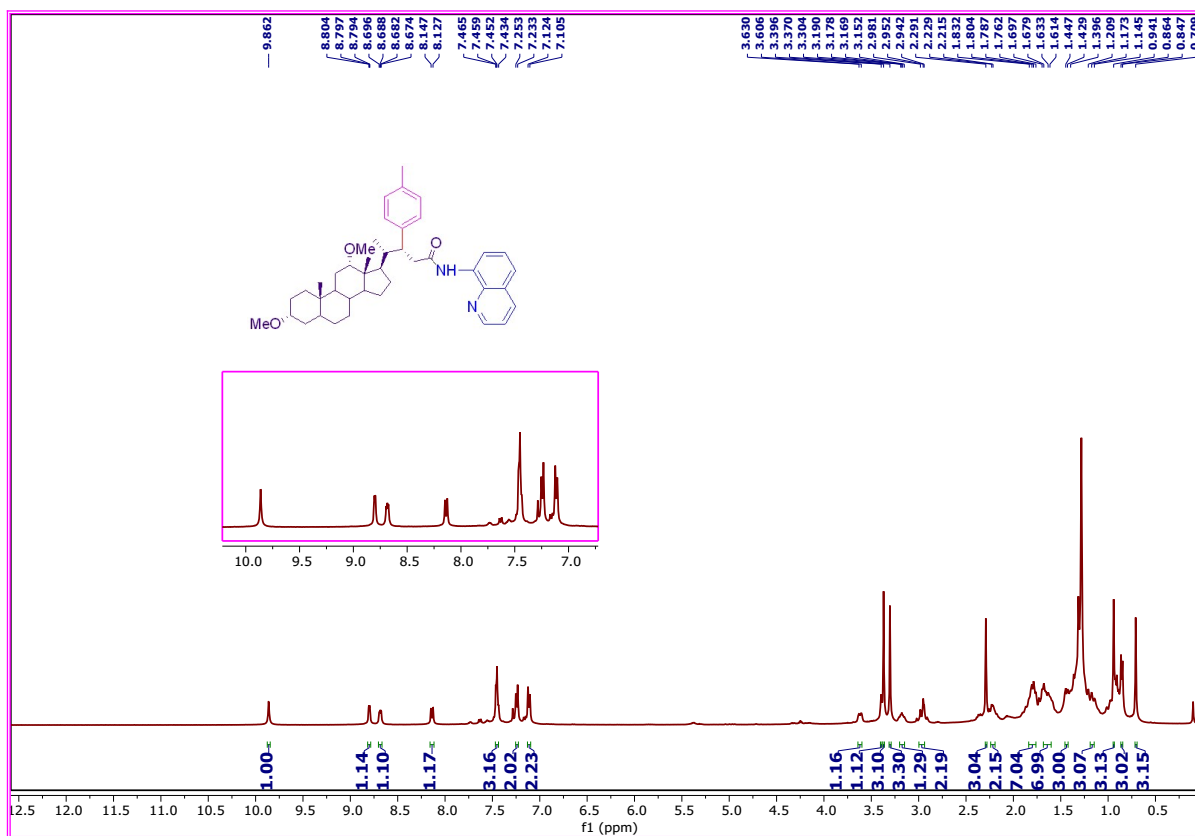

### <sup>13</sup>C NMR of 3bb (400 MHz, CDCl<sub>3</sub>)

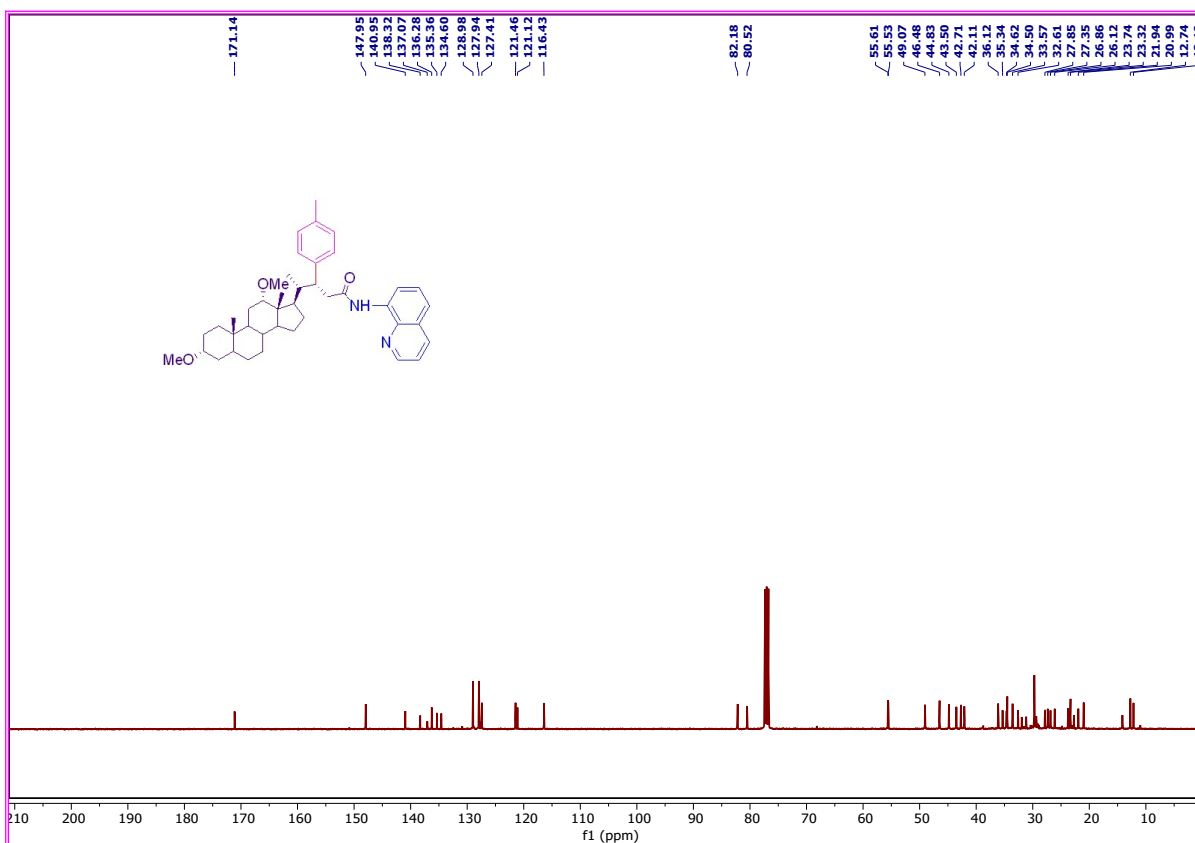

### <sup>1</sup>H NMR of 3bc (400 MHz, CDCl<sub>3</sub>)

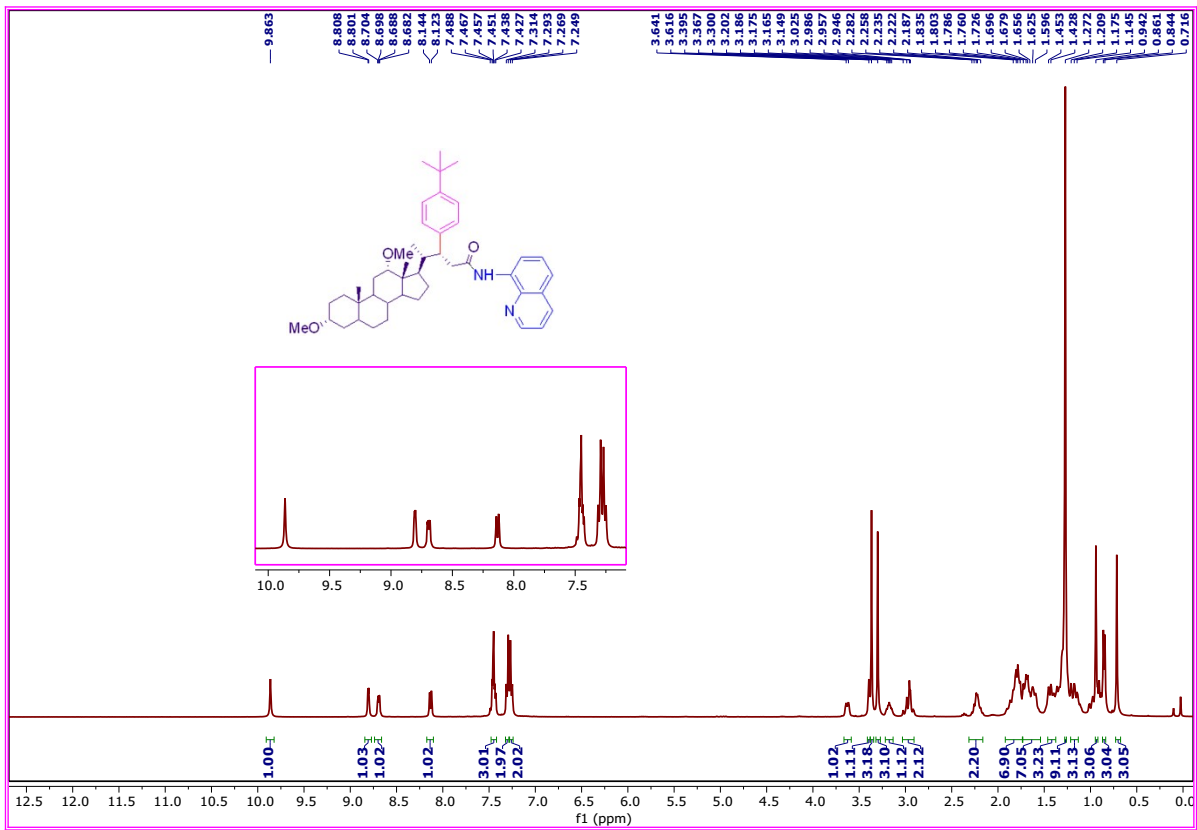

### <sup>13</sup>C NMR of 3bc (400 MHz, CDCl<sub>3</sub>)

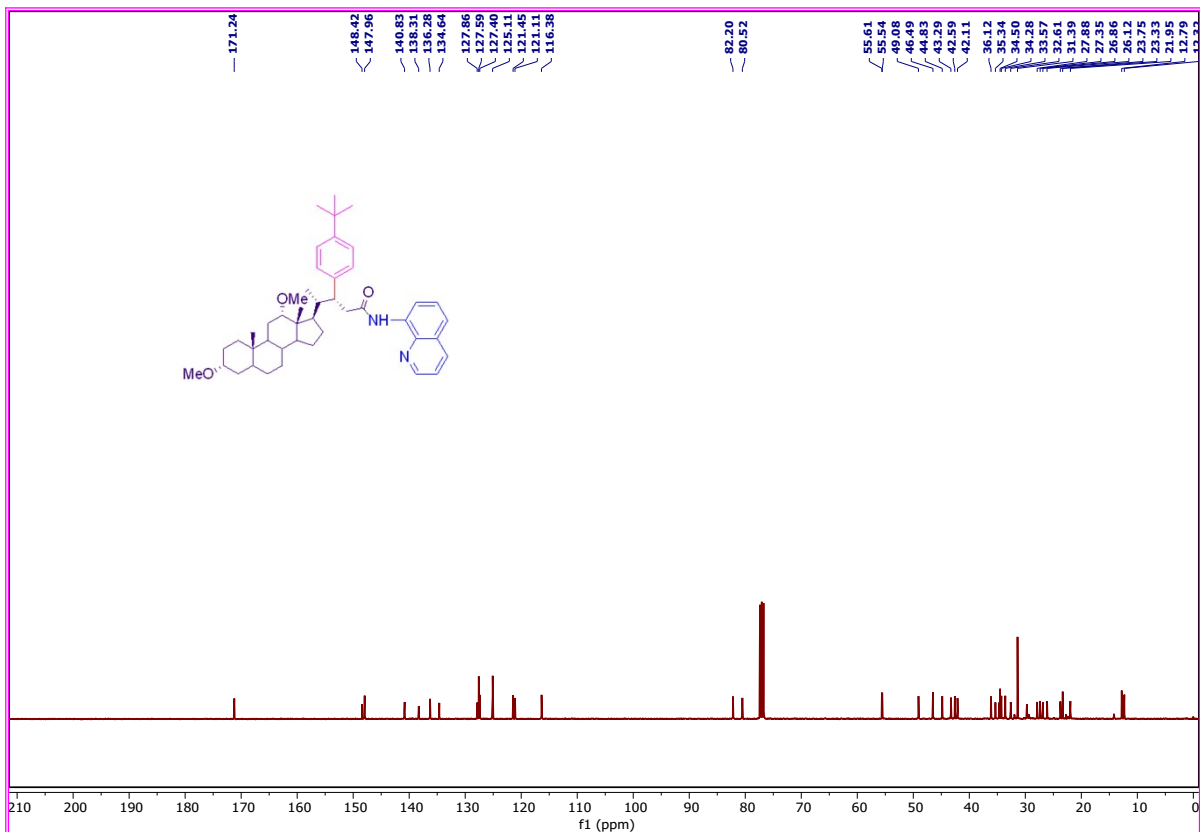



### <sup>1</sup>H NMR of 3bg (400 MHz, CDCl<sub>3</sub>)

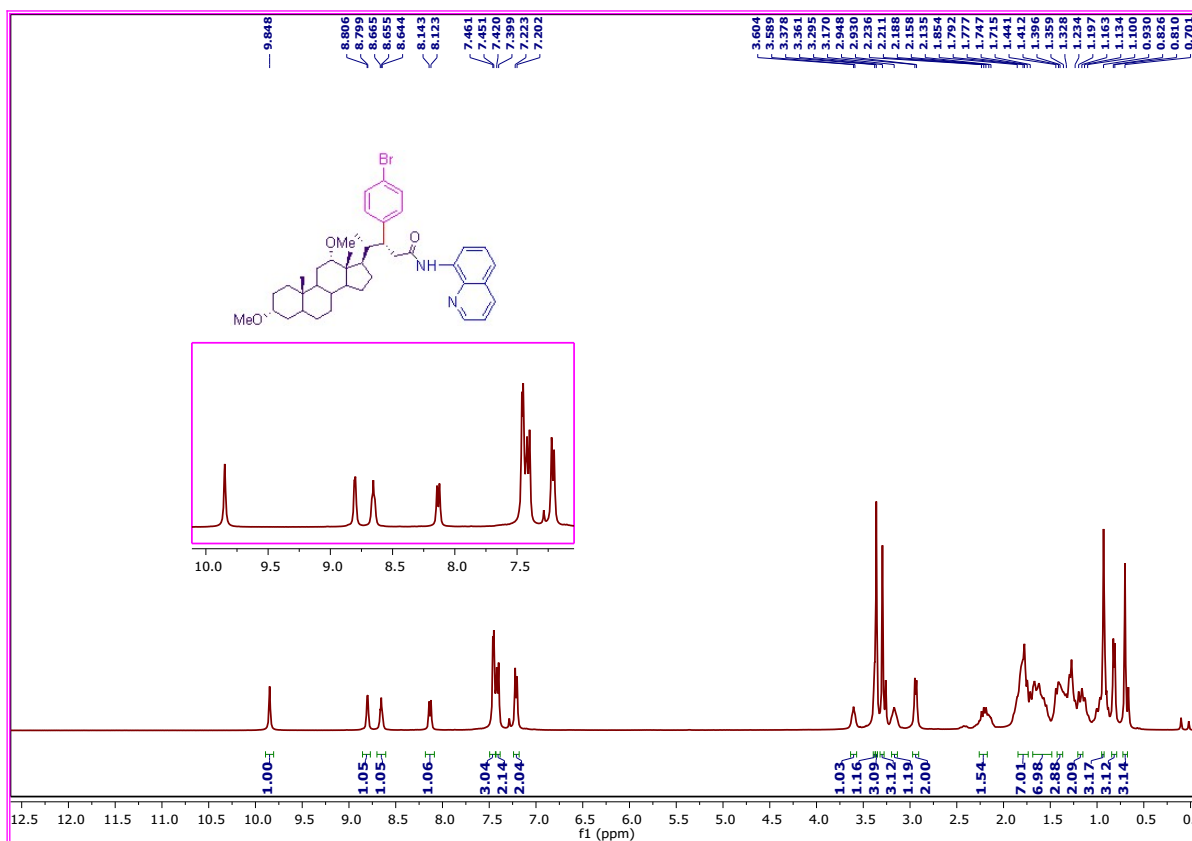

### <sup>13</sup>C NMR of 3bg (400 MHz, CDCl<sub>3</sub>)

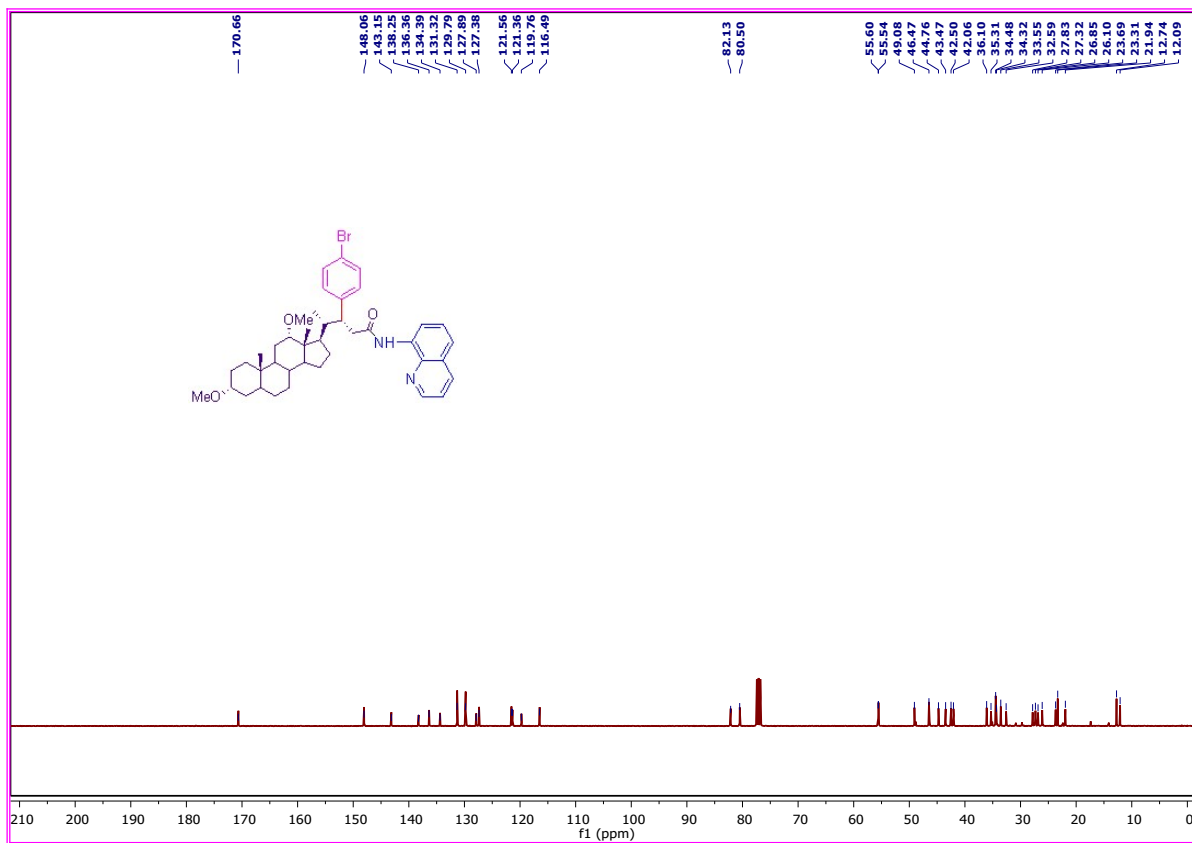



### <sup>1</sup>H NMR of 3bh (400 MHz, CDCl<sub>3</sub>)

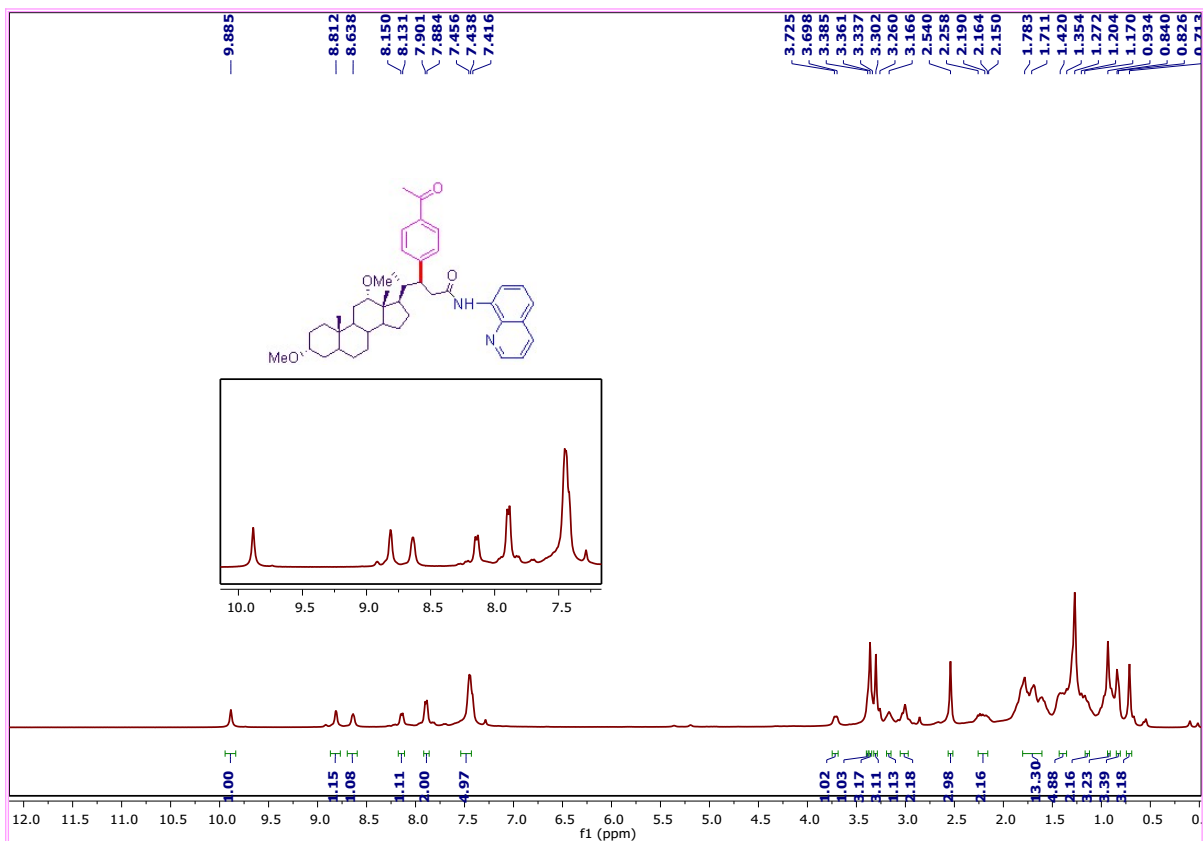

### <sup>13</sup>C NMR of 3bh (400 MHz, CDCl<sub>3</sub>)

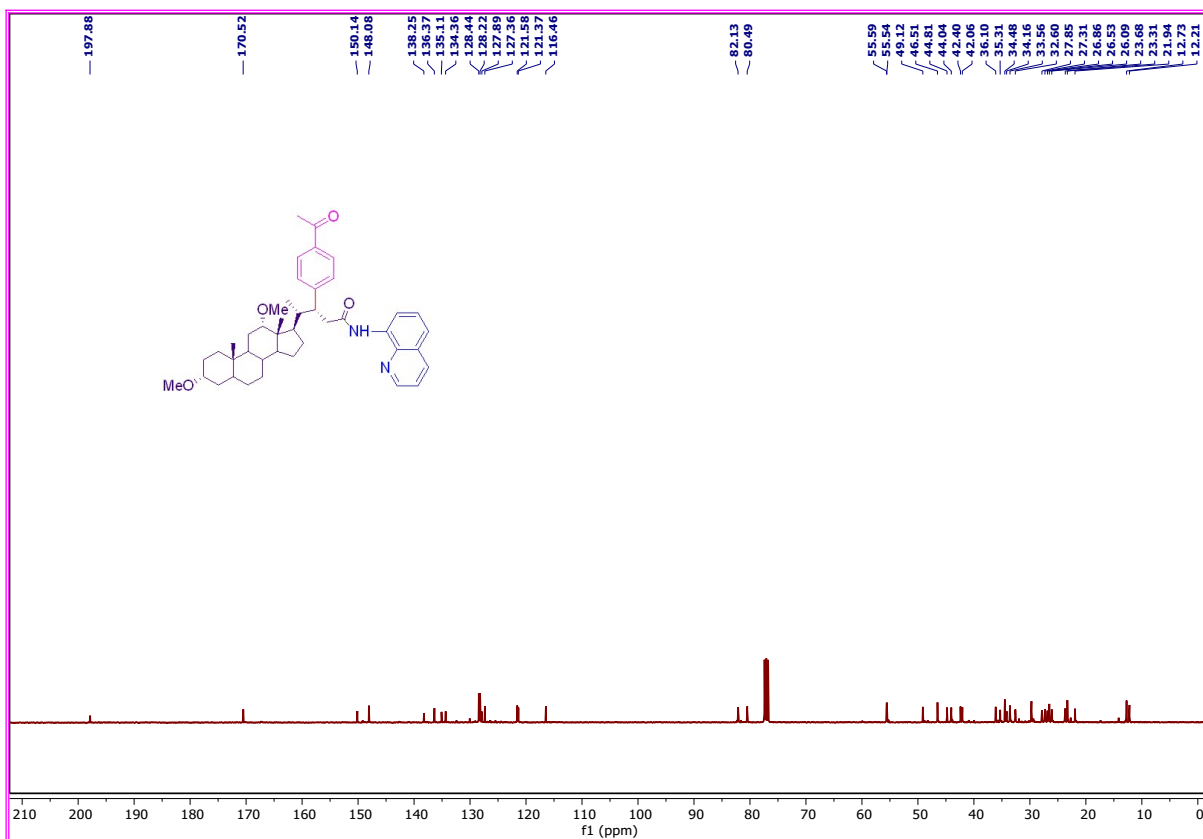

### <sup>1</sup>H NMR of 3bk (400 MHz, CDCl<sub>3</sub>)

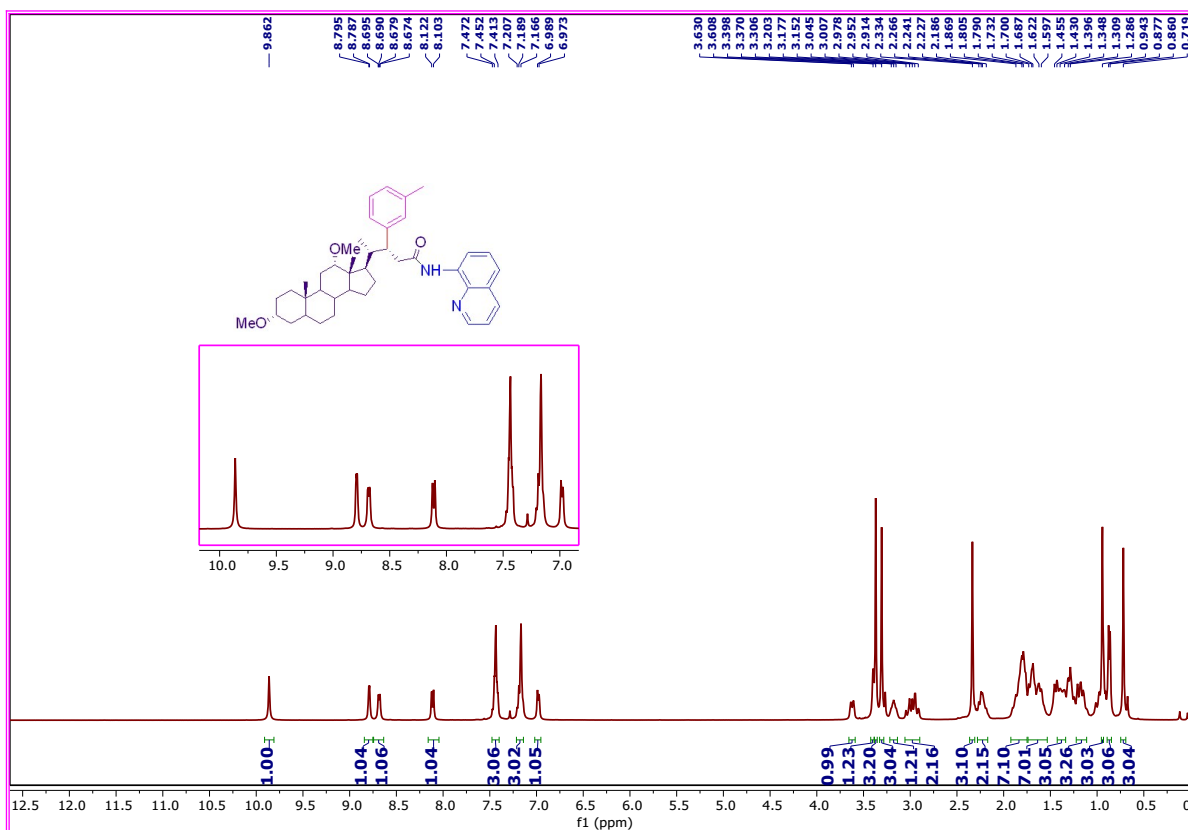

### <sup>13</sup>C NMR of 3bk (400 MHz, CDCl<sub>3</sub>)

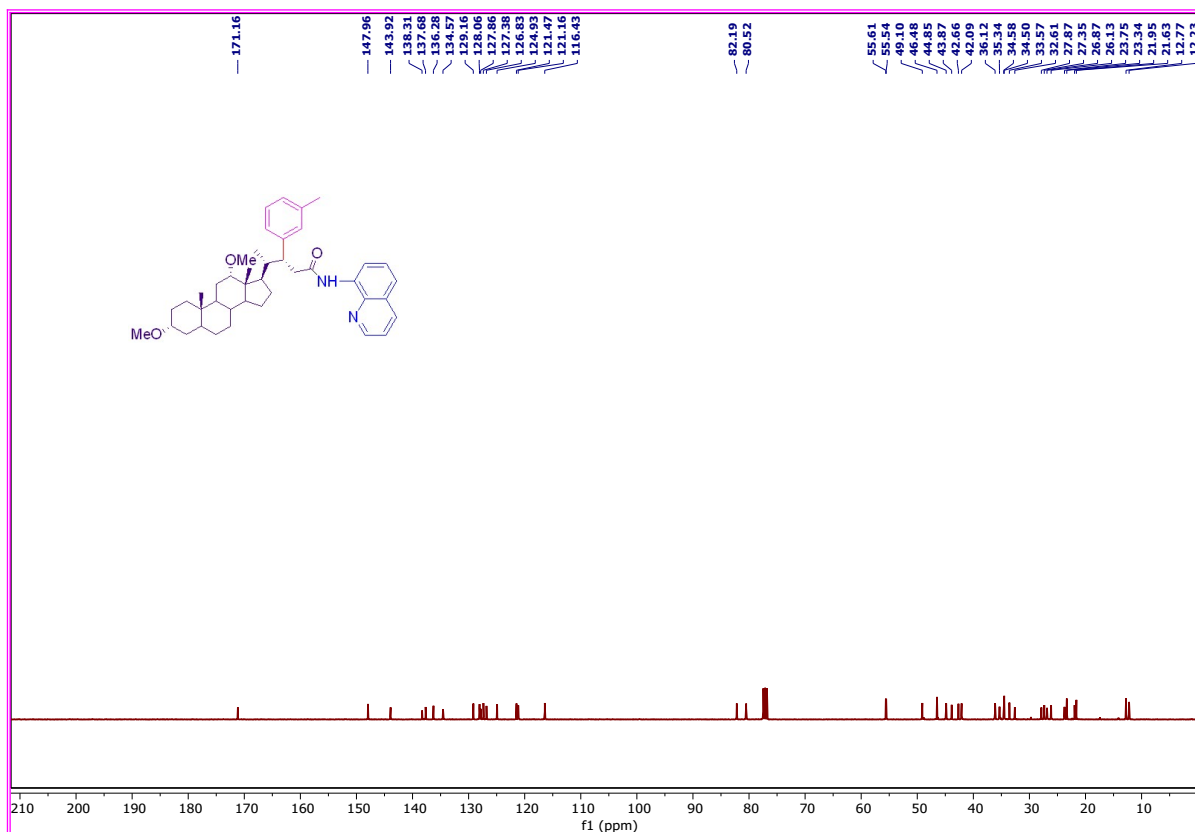

### <sup>1</sup>H NMR of 3bl (400 MHz, CDCl<sub>3</sub>)

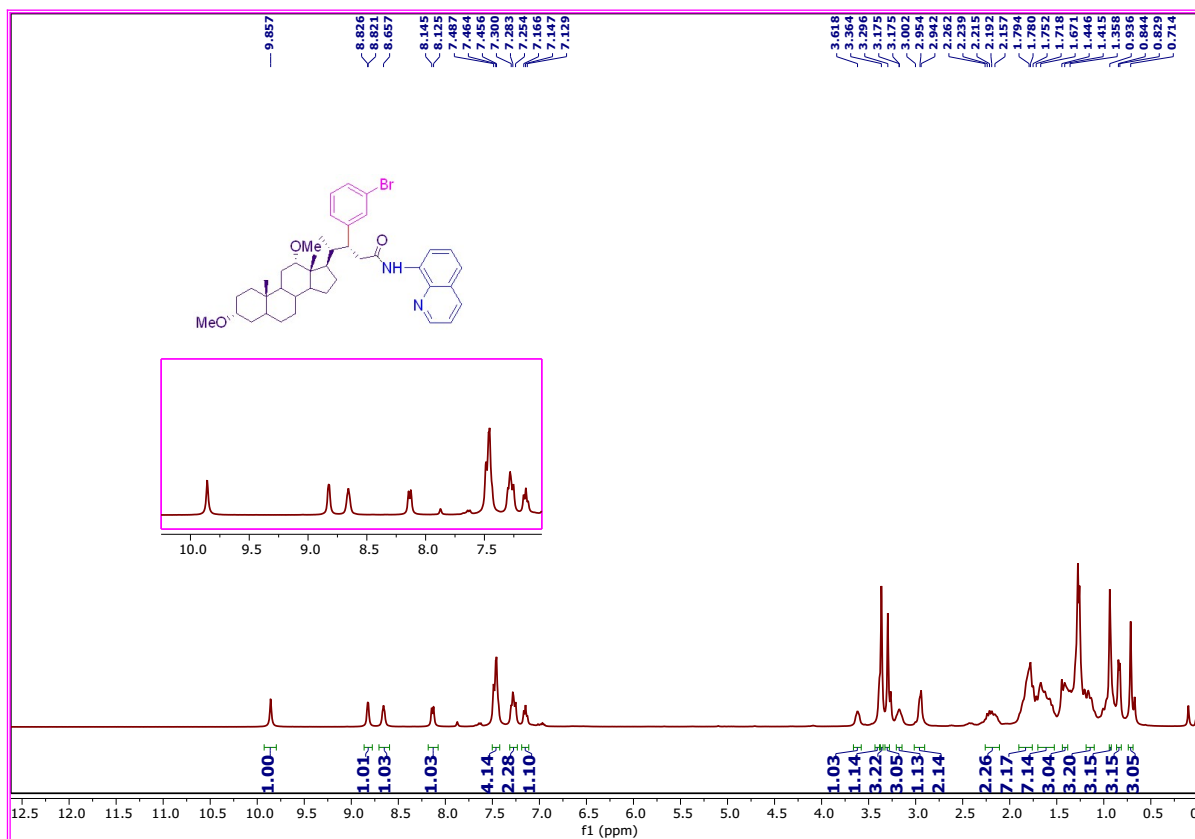

### <sup>13</sup>C NMR of 3bl (400 MHz, CDCl<sub>3</sub>)

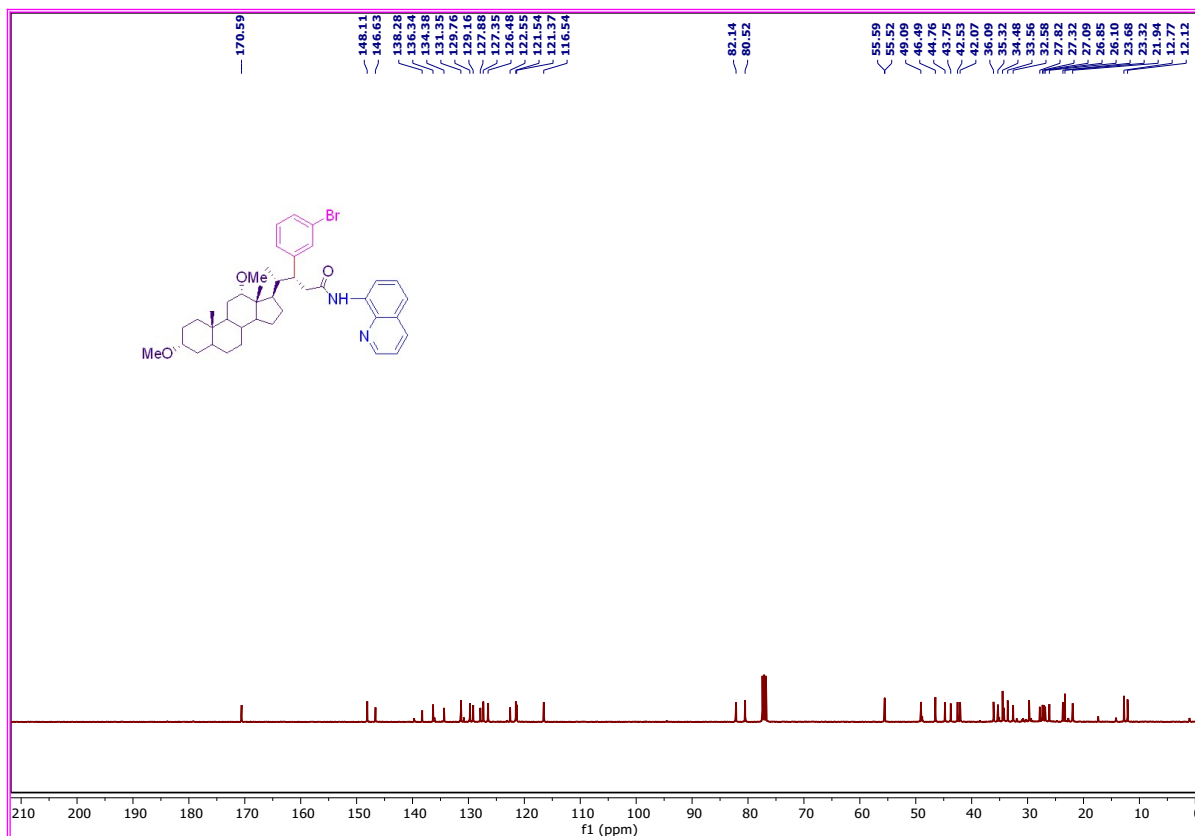

### <sup>1</sup>H NMR of 3bm (400 MHz, CDCl<sub>3</sub>)

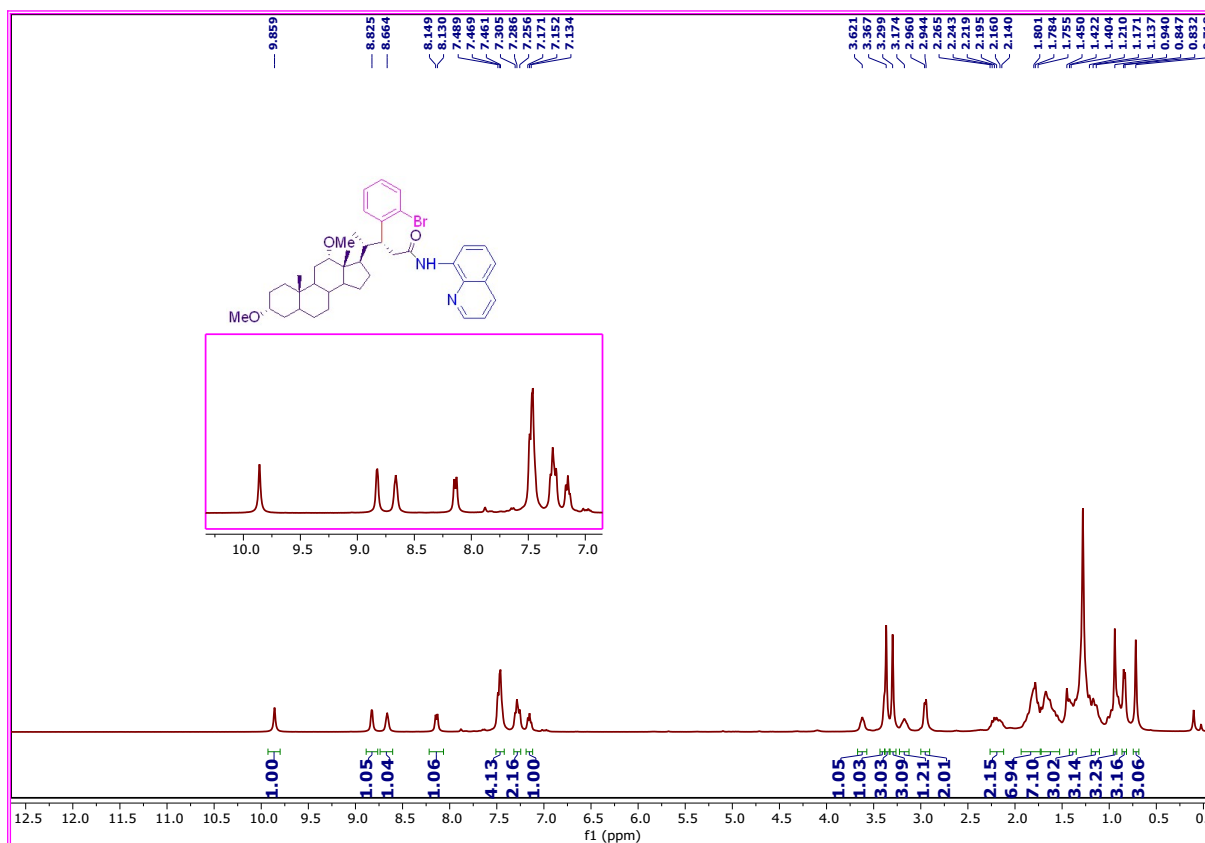

### <sup>13</sup>C NMR of 3bm (400 MHz, CDCl<sub>3</sub>)

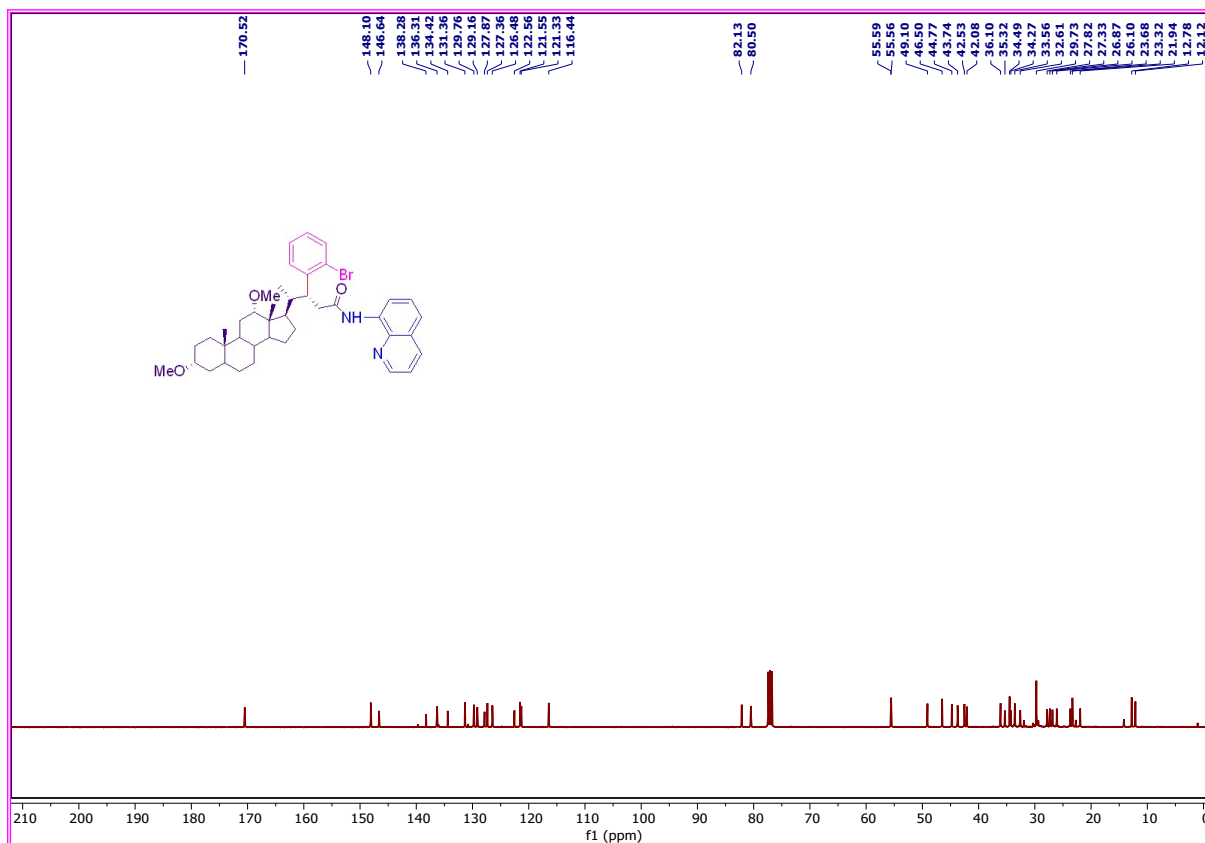

### <sup>1</sup>H NMR of 3bn (400 MHz, CDCl<sub>3</sub>)

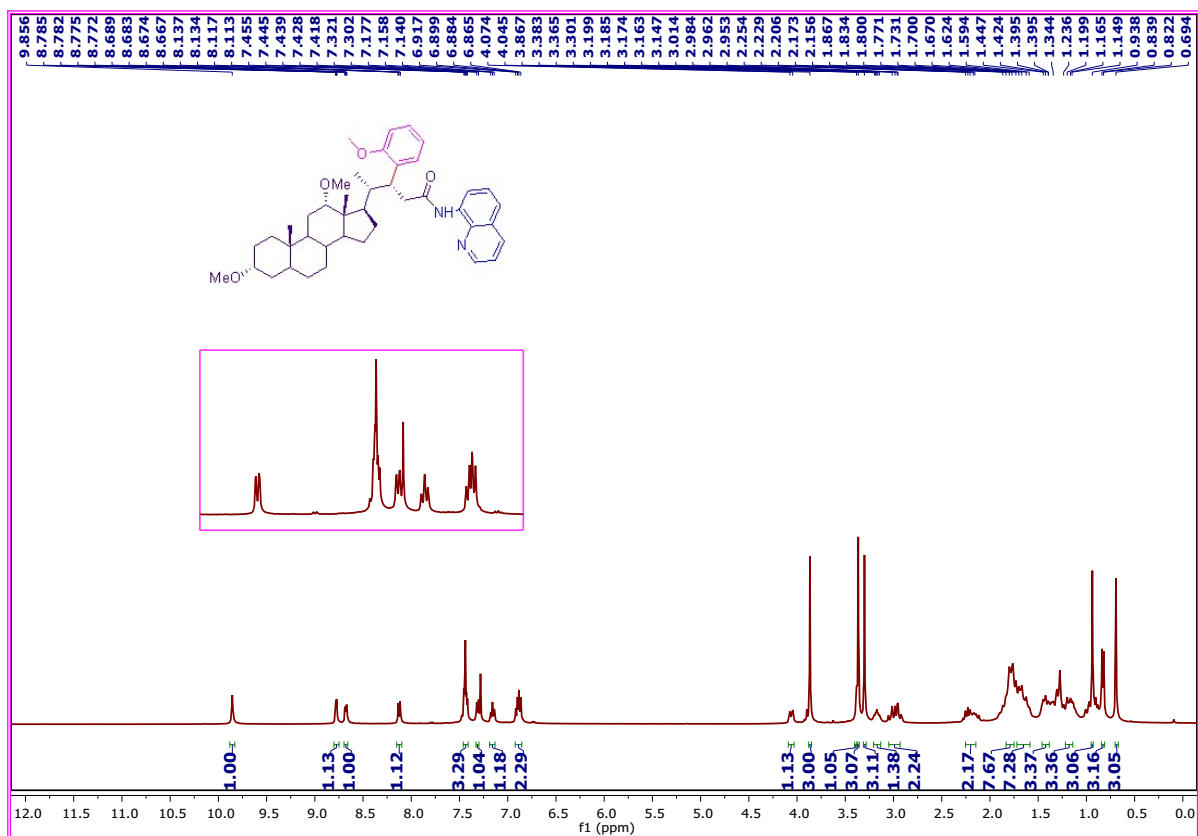

### <sup>13</sup>C NMR of 3bn (400 MHz, CDCl<sub>3</sub>)

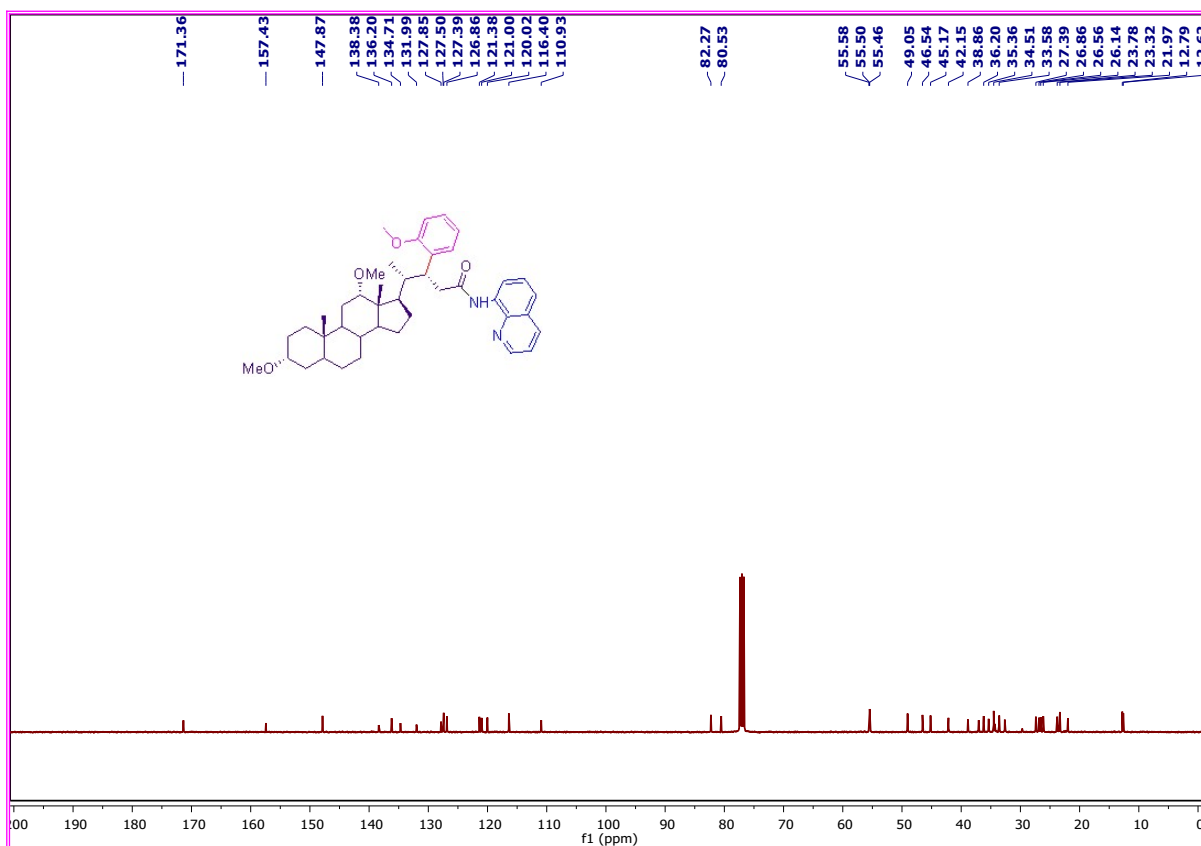

### <sup>1</sup>H NMR of 3bo (400 MHz, CDCl<sub>3</sub>)

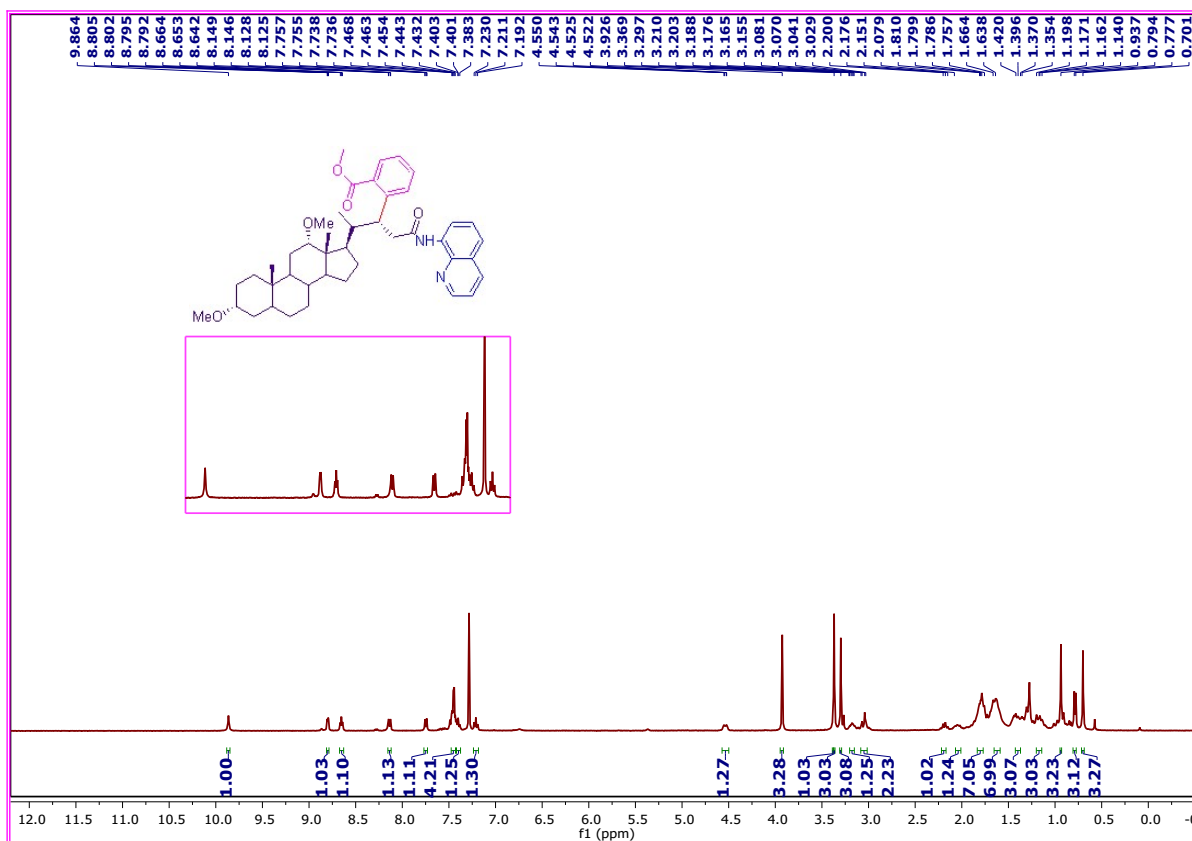

### <sup>13</sup>C NMR of 3bo (400 MHz, CDCl<sub>3</sub>)

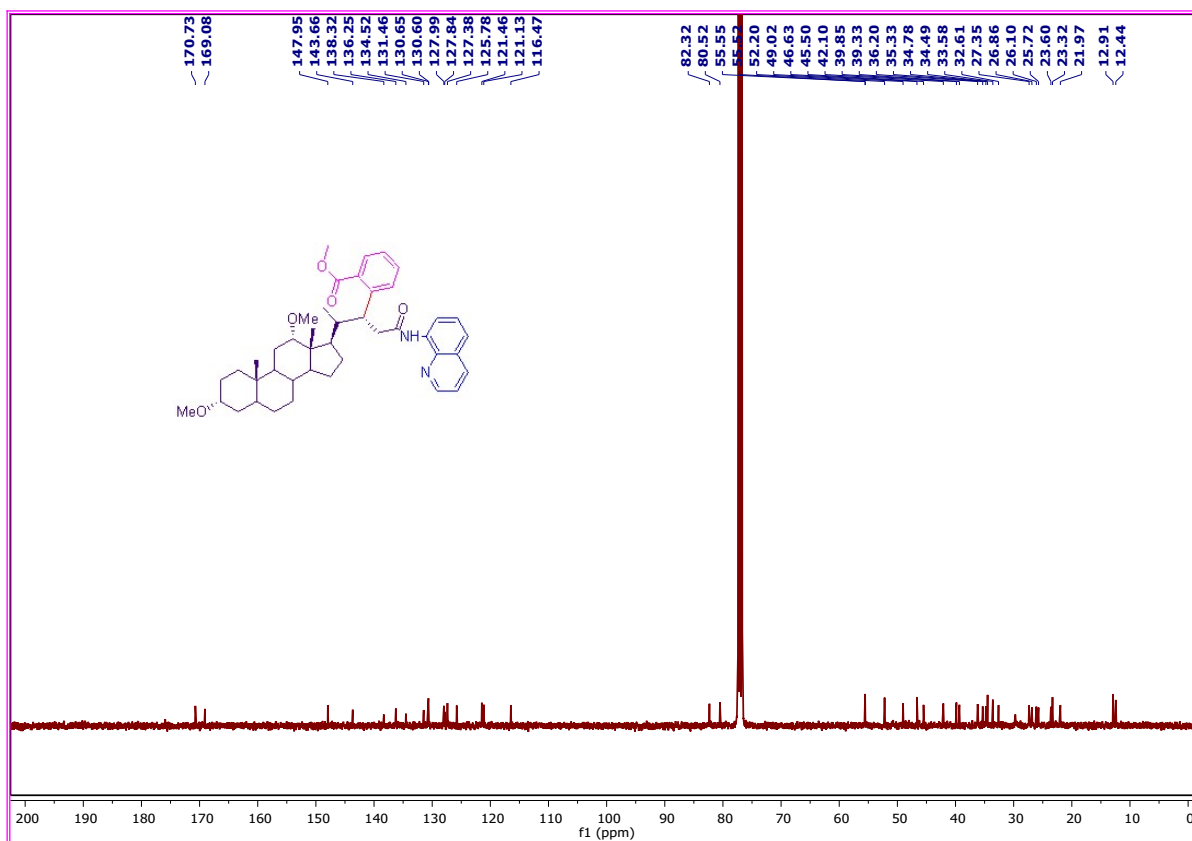

### <sup>1</sup>H NMR of 3bp (400 MHz, CDCl<sub>3</sub>)

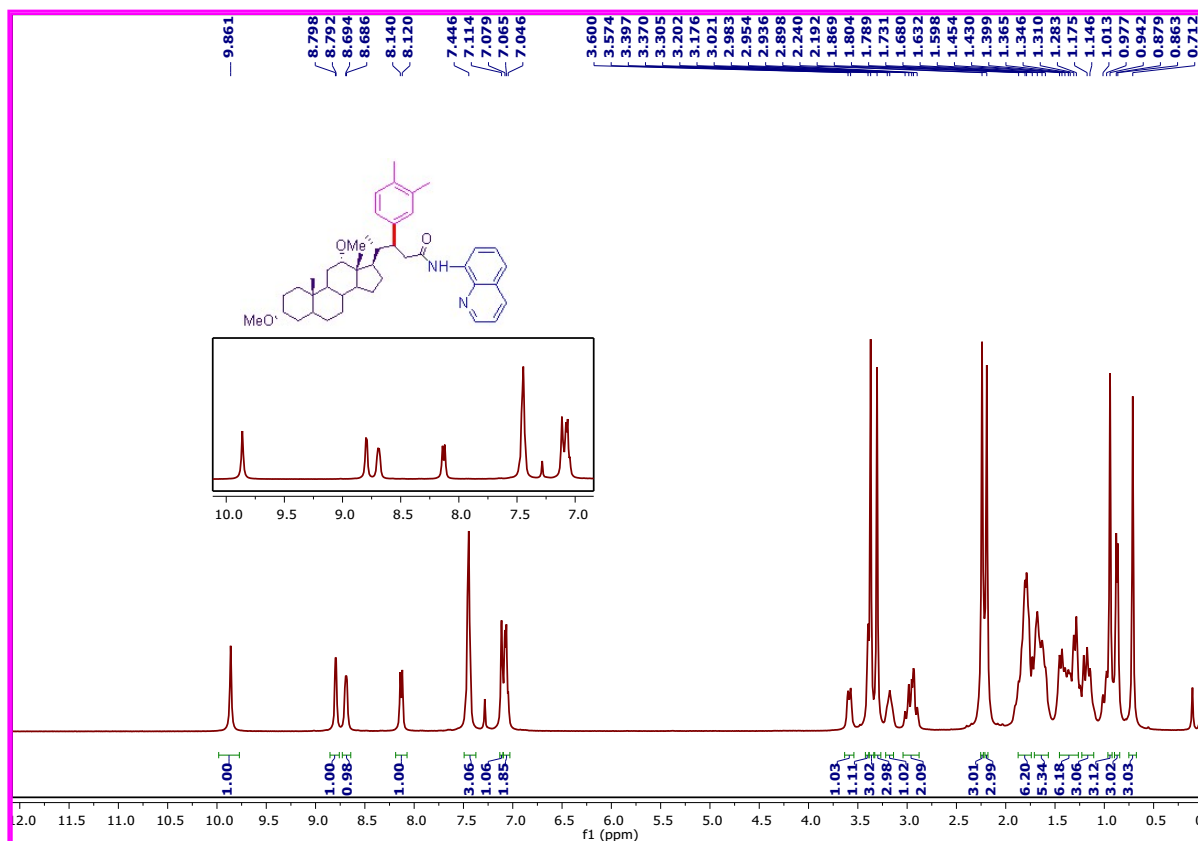

### <sup>13</sup>C NMR of 3bp (400 MHz, CDCl<sub>3</sub>)

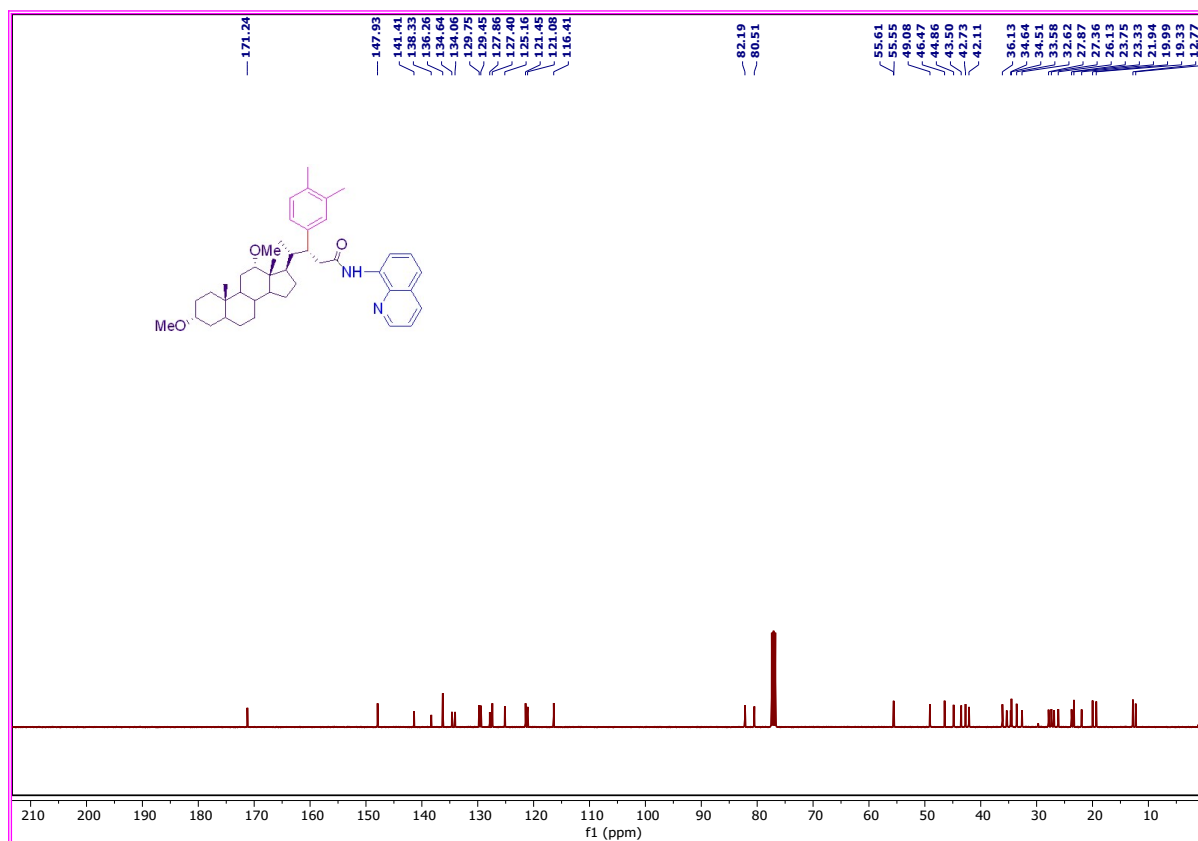

### <sup>1</sup>H NMR of 3bq (400 MHz, CDCl<sub>3</sub>)

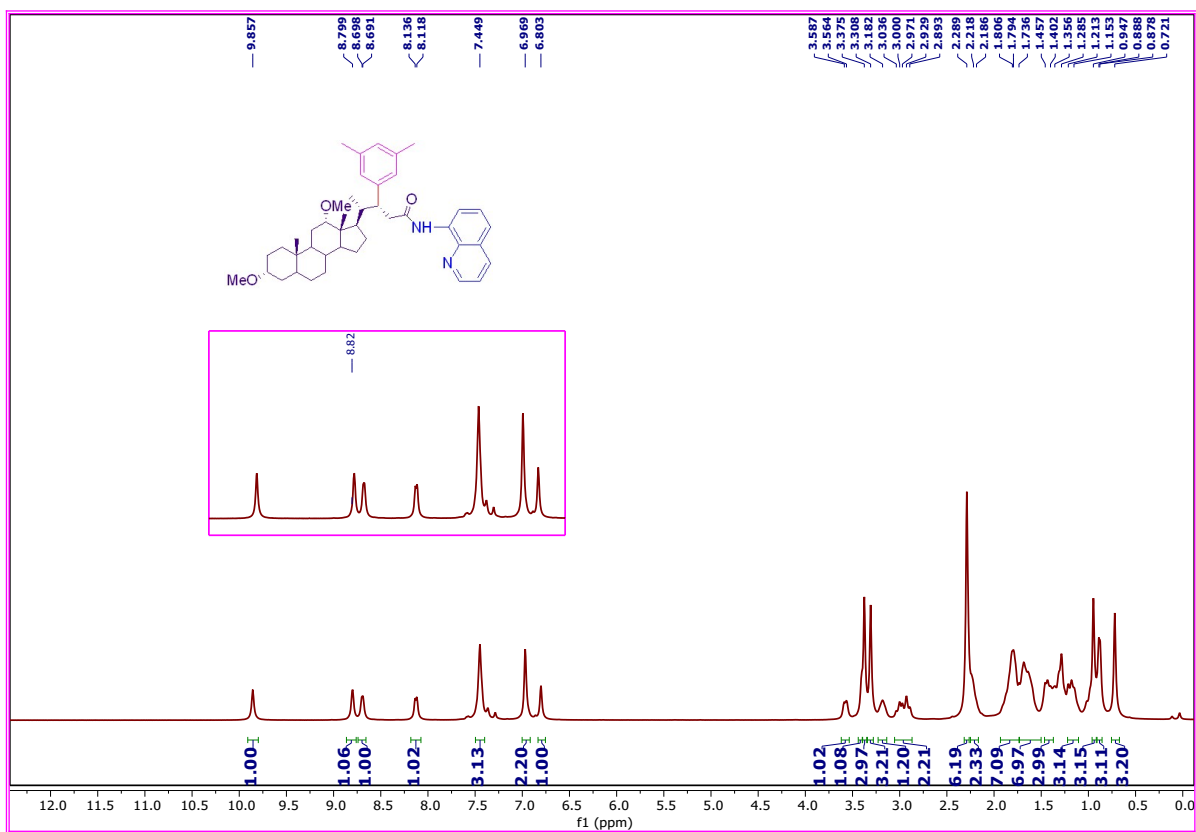

### <sup>13</sup>C NMR of 3bq (400 MHz, CDCl<sub>3</sub>)

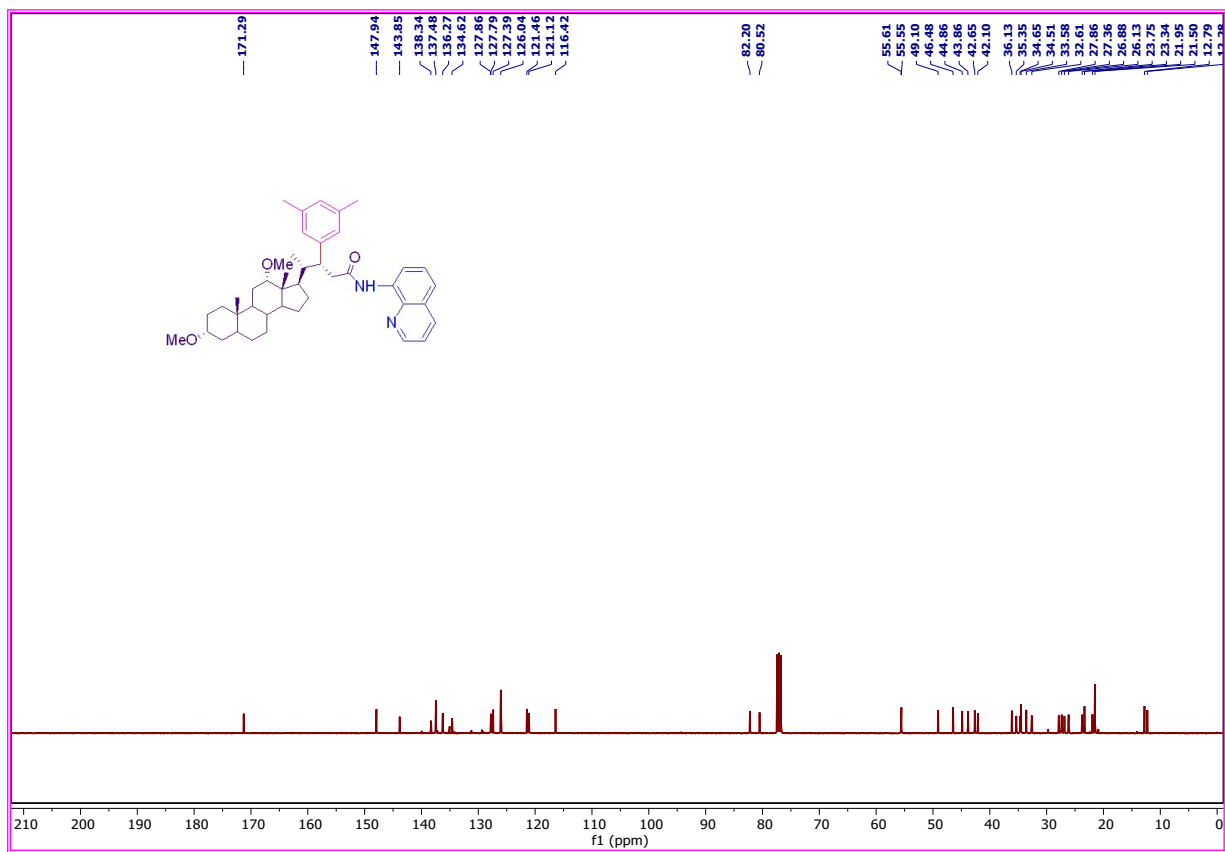



### <sup>1</sup>H NMR of 3bs (400 MHz, CDCl<sub>3</sub>)

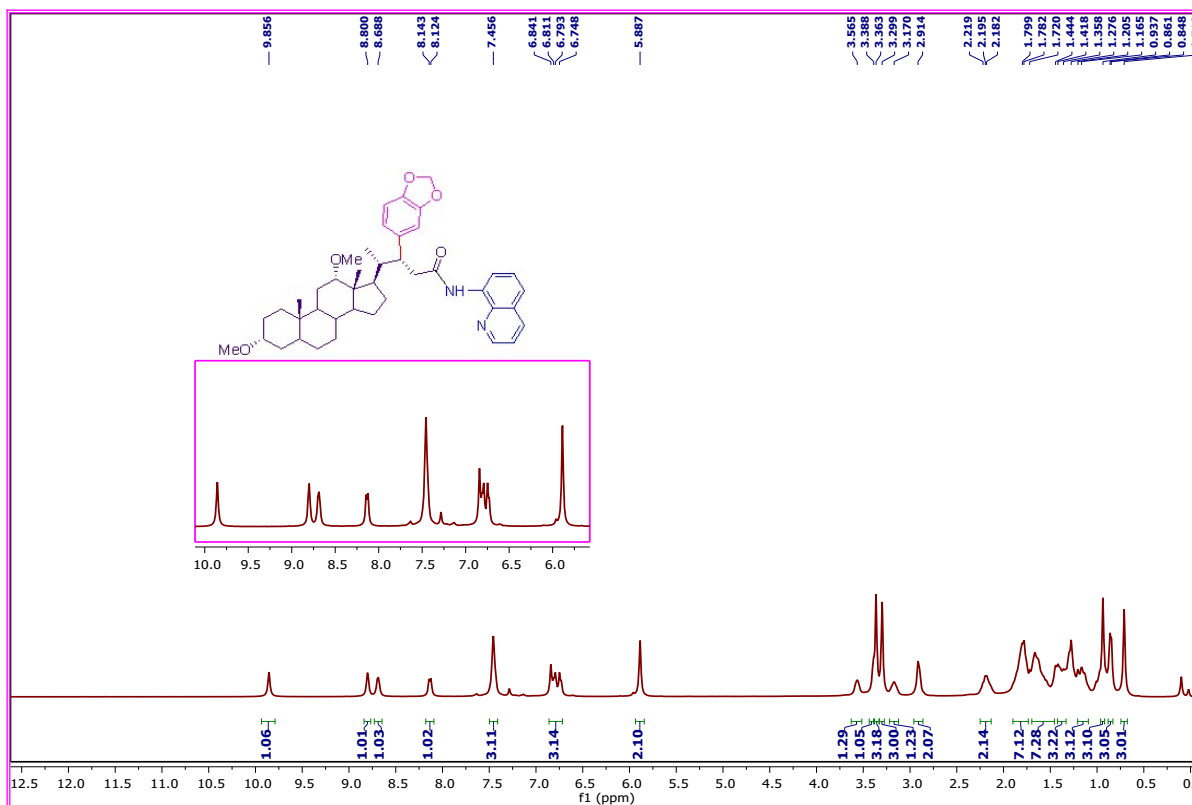

### <sup>13</sup>C NMR of 3bs (400 MHz, CDCl<sub>3</sub>)

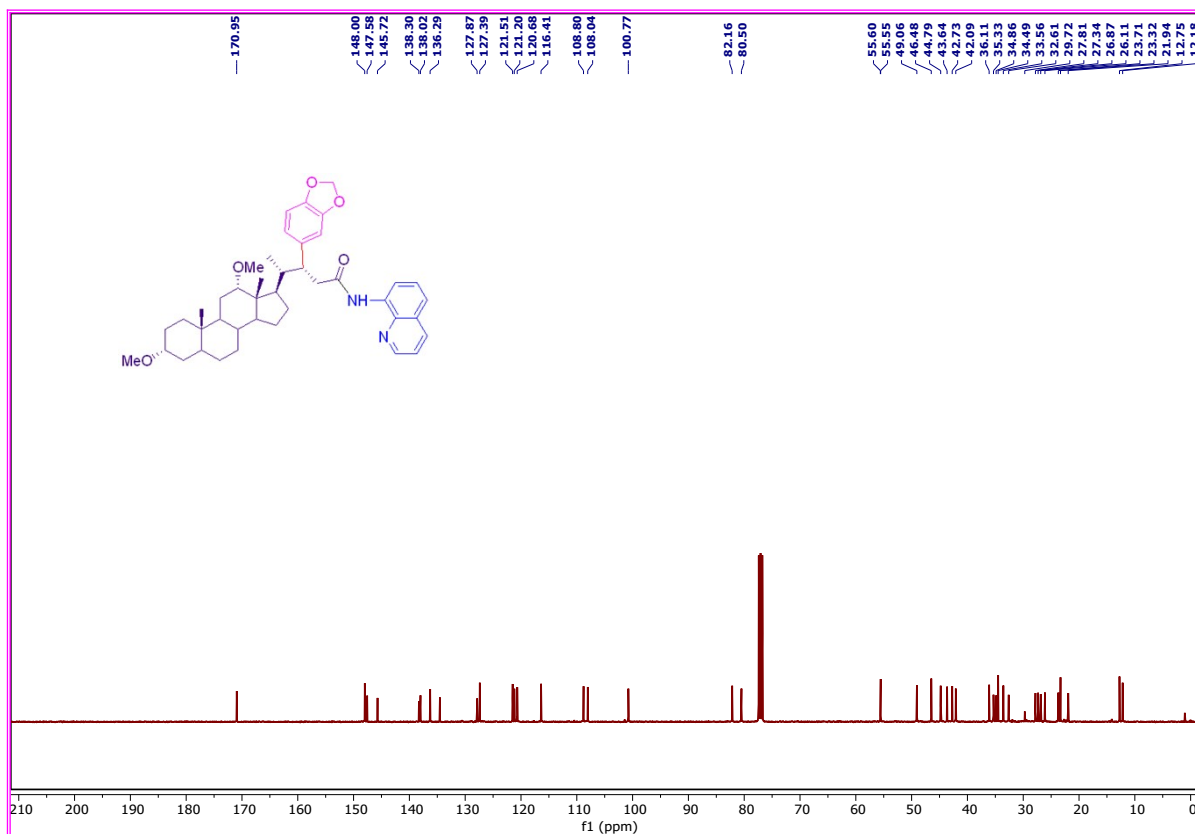

### <sup>1</sup>H NMR of 3bt (400 MHz, CDCl<sub>3</sub>)

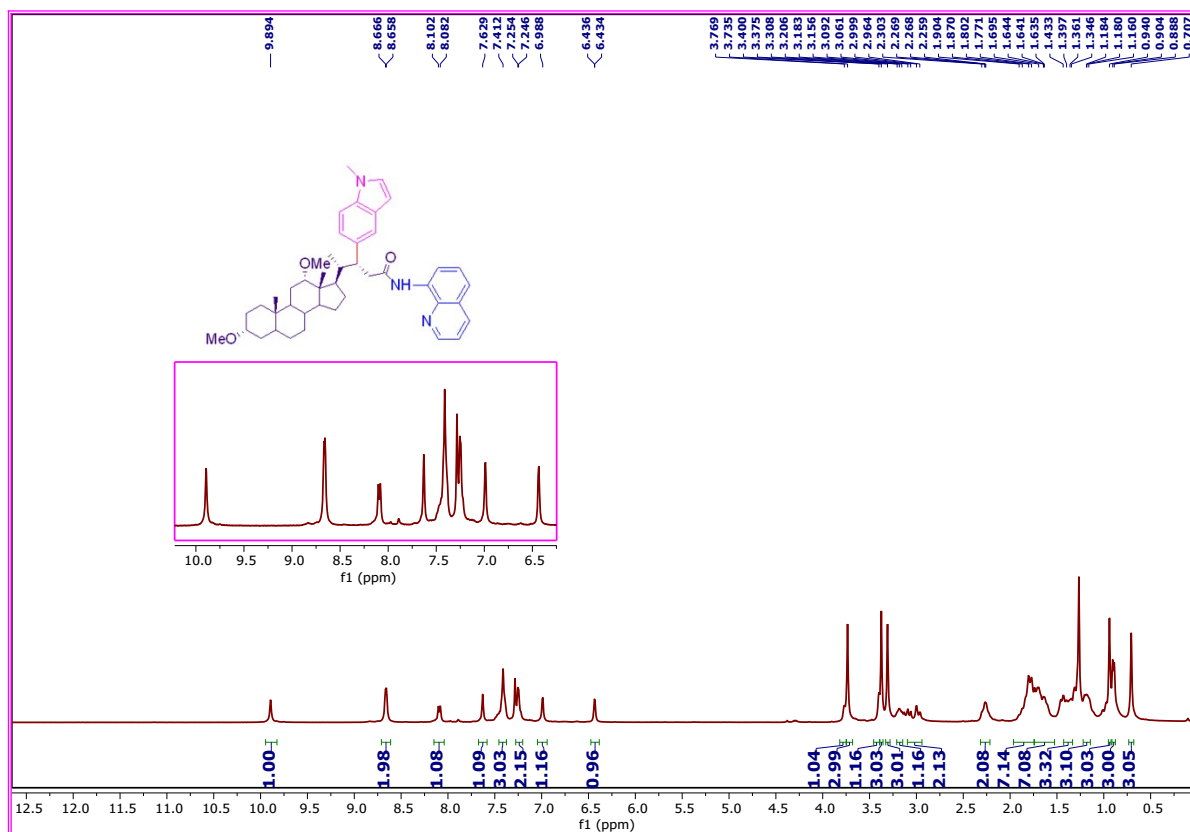

### <sup>13</sup>C NMR of 3bt (400 MHz, CDCl<sub>3</sub>)

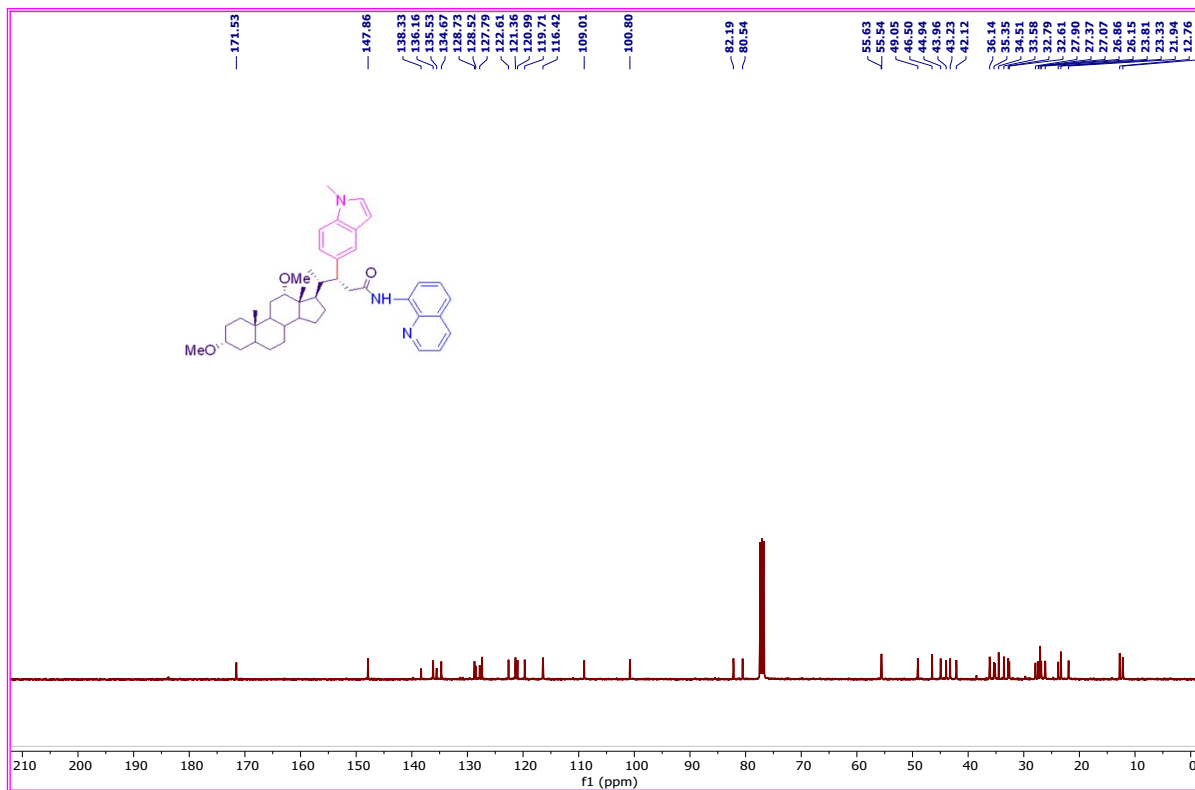

### <sup>1</sup>H NMR of 3bu (400 MHz, CDCl<sub>3</sub>)

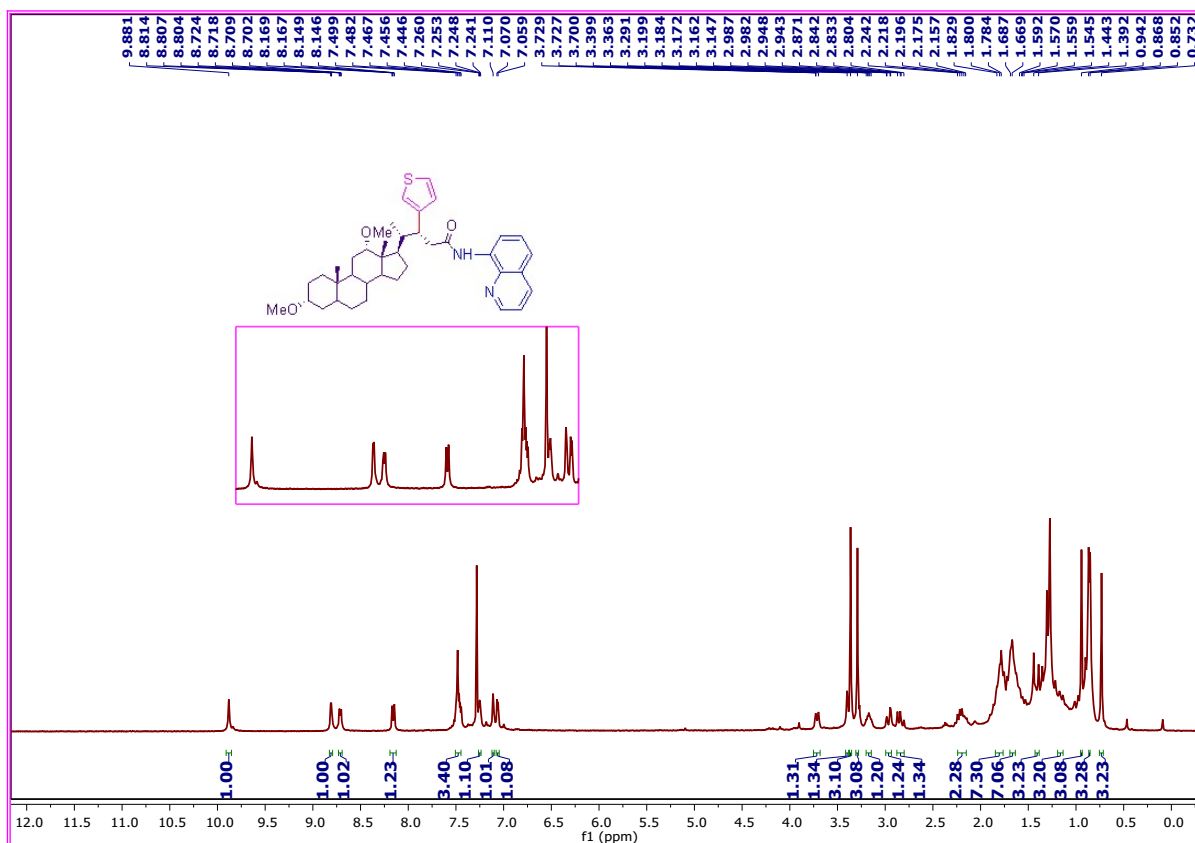

### <sup>13</sup>C NMR of 3bu (400 MHz, CDCl<sub>3</sub>)

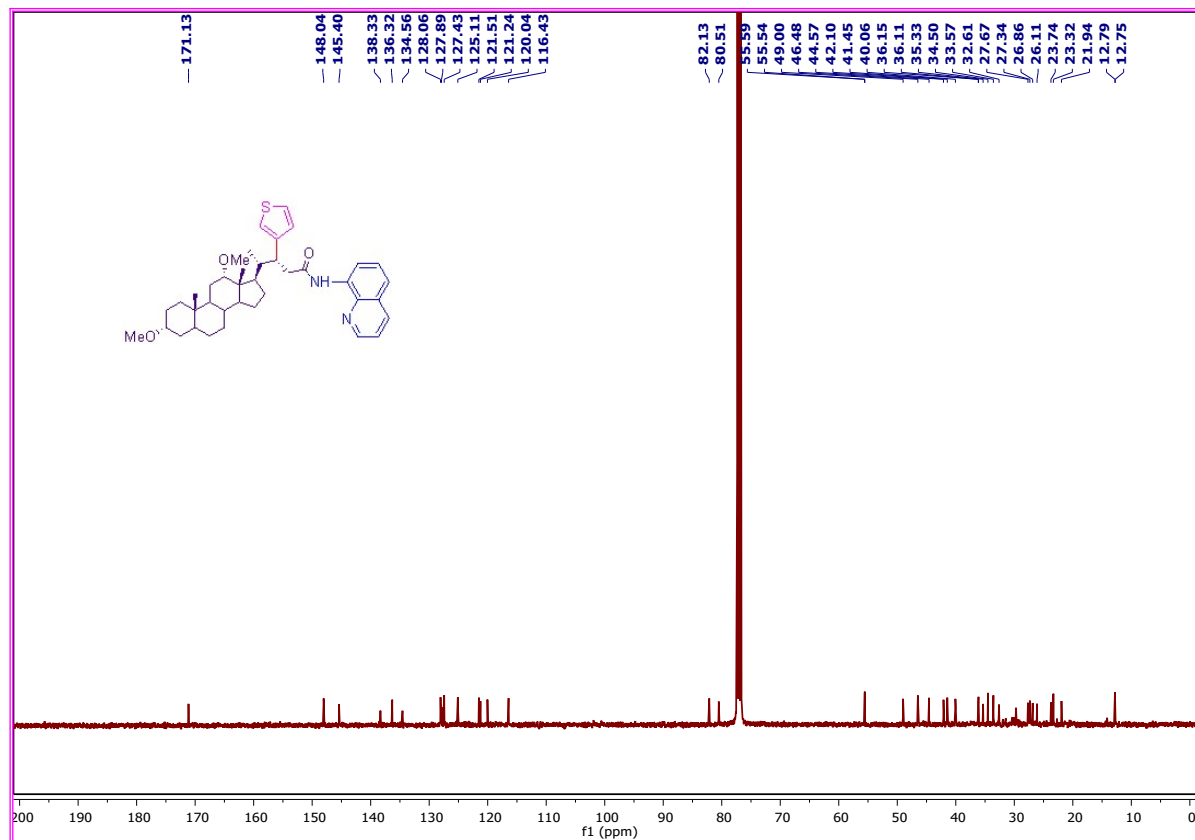

### <sup>1</sup>H NMR of 3bv (400 MHz, CDCl<sub>3</sub>)

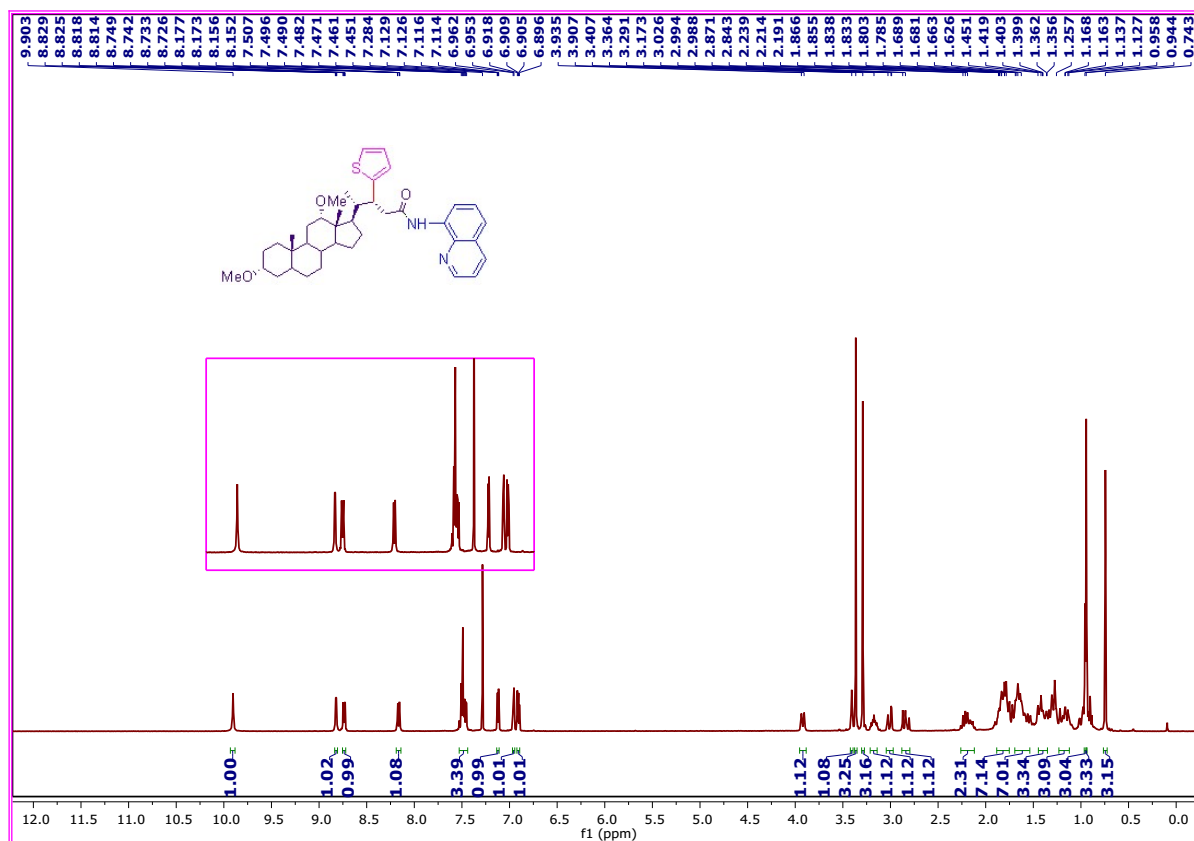

### <sup>13</sup>C NMR of 3bv (400 MHz, CDCl<sub>3</sub>)

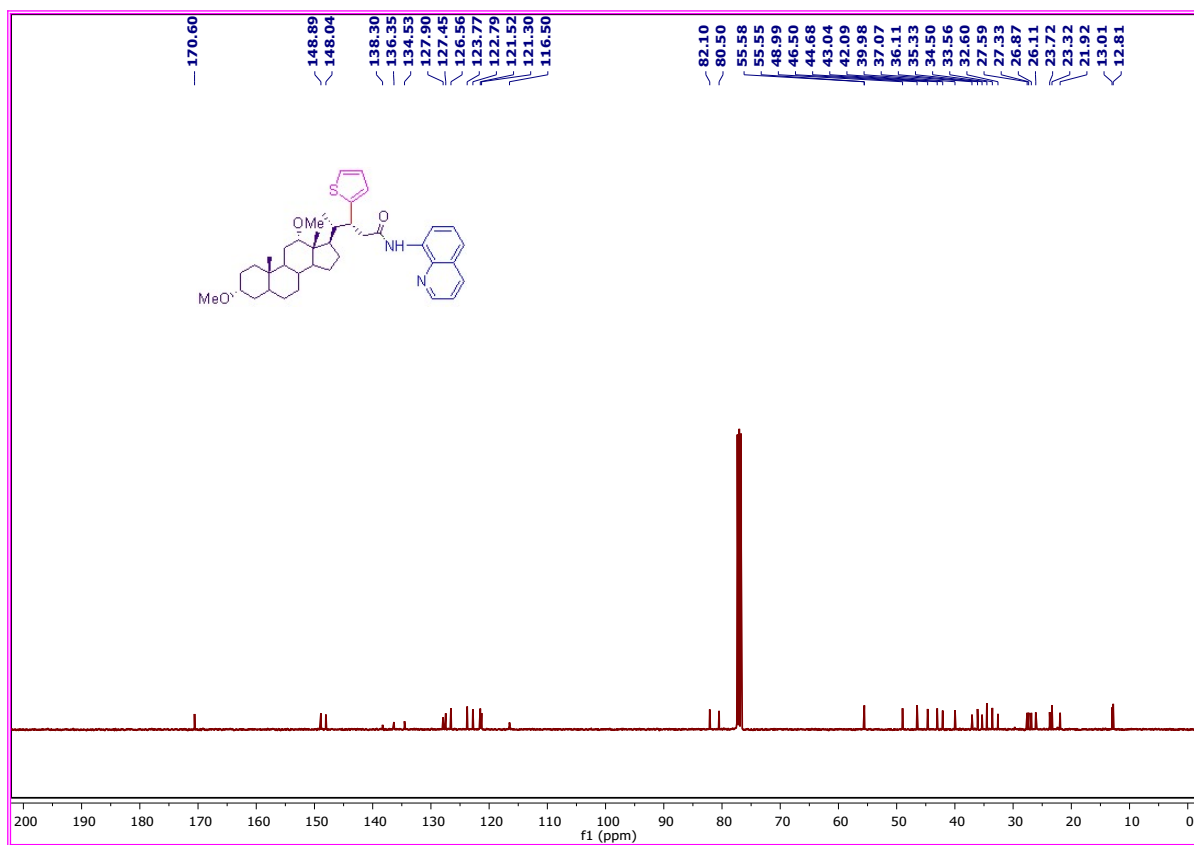

### <sup>1</sup>H NMR of 4ba (400 MHz, CDCl<sub>3</sub>)

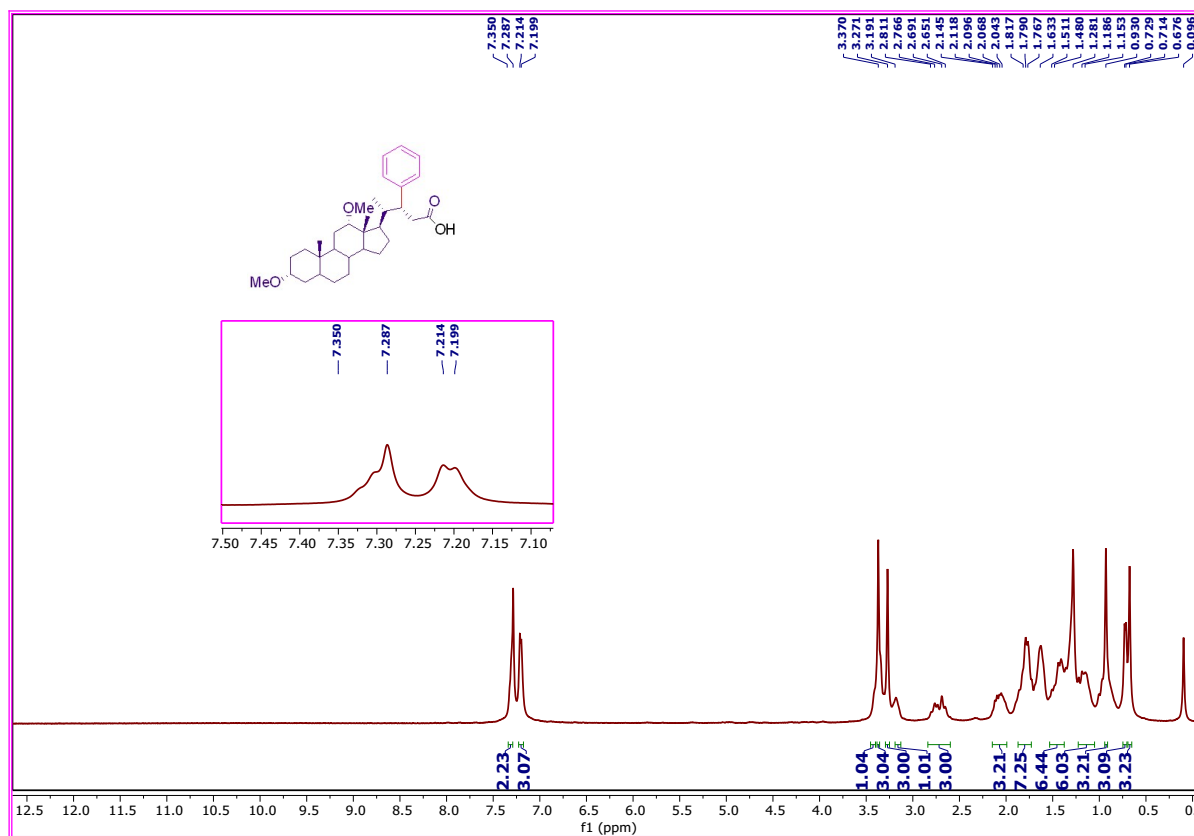

### <sup>13</sup>C NMR of 4ba (400 MHz, CDCl<sub>3</sub>)

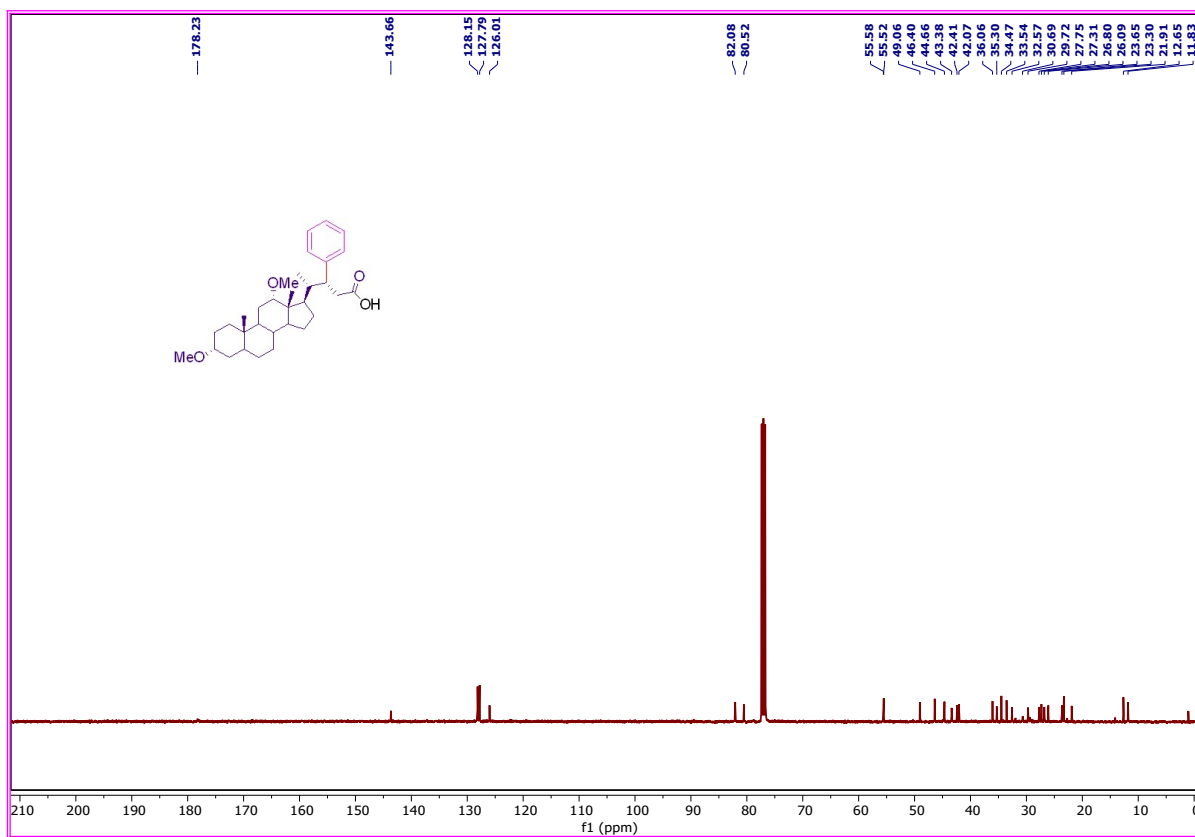

### 3. Competitive Experiment

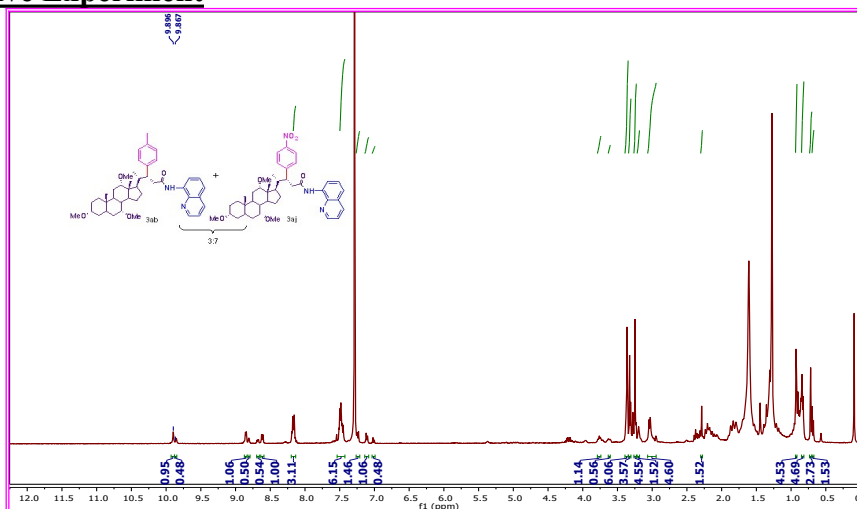

### 4. Characterization Data of Intermediate Complex (Crude)

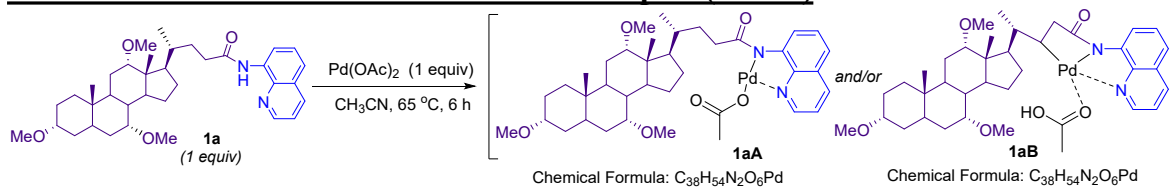

*Crude Complex*  
 Confirmed by HRMS and comparison of its UV-Vis and IR spectra with that of **1a**

### Comparison of UV-Vis and IR Spectra of Intermediate Complex with Starting Materials

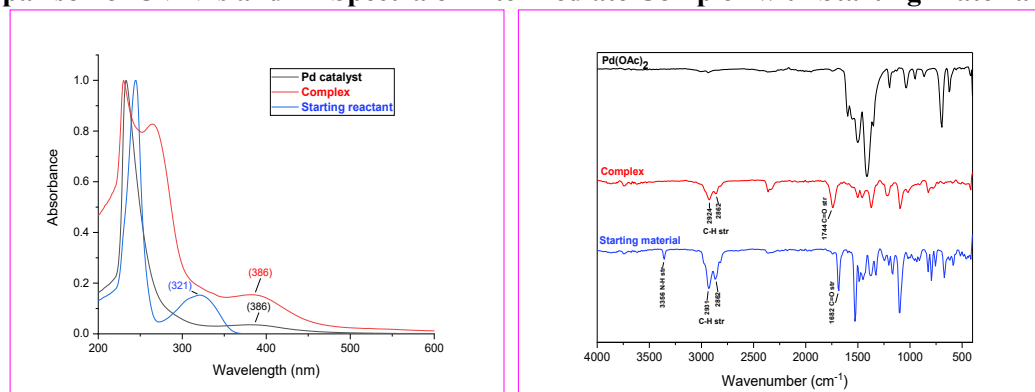

### HRMS of the Intermediate Complex (Crude)

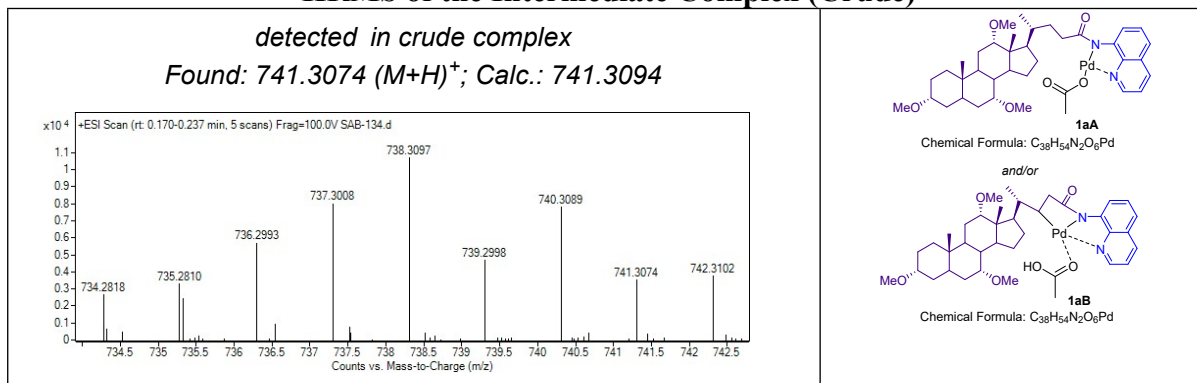

## 5. HPLC Profiles of 3

### HPLC Profiles of 3aa & 3ba

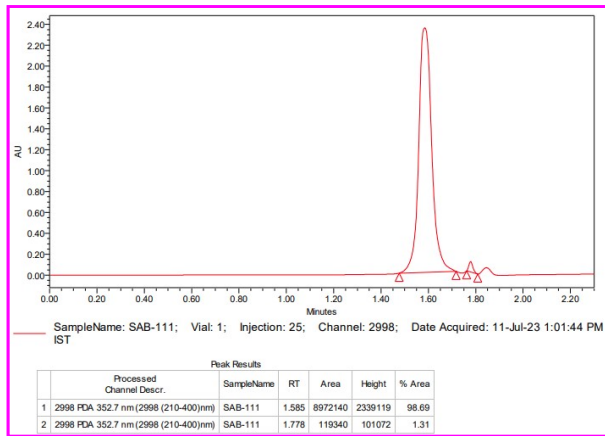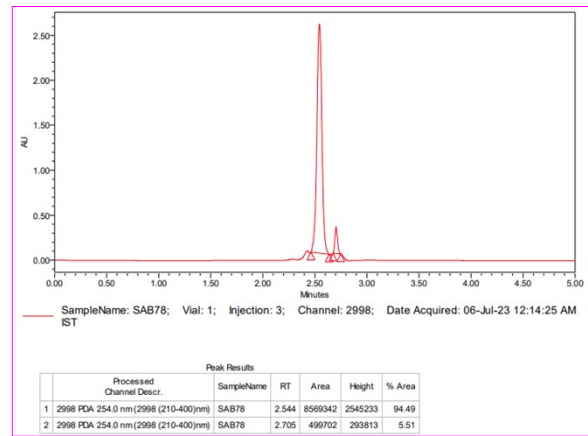

### HPLC Profiles of 3ab & 3bb

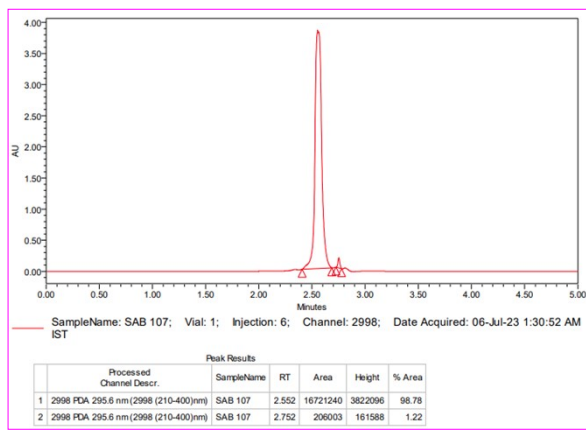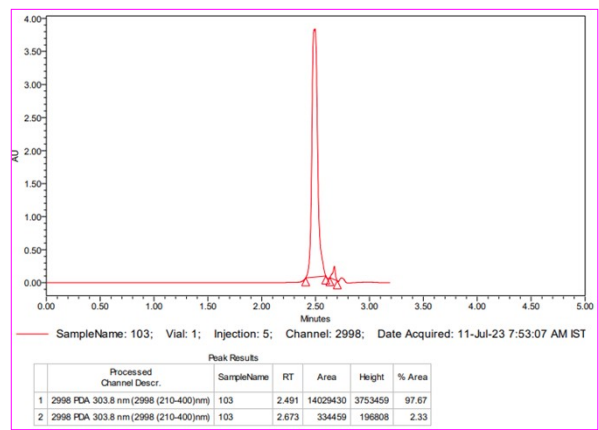

### HPLC Profile of 3ac & 3bc

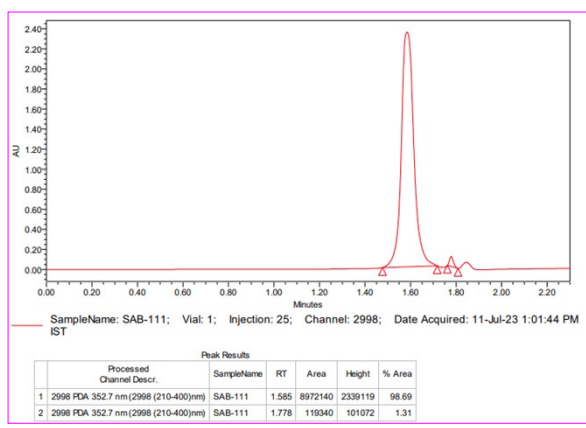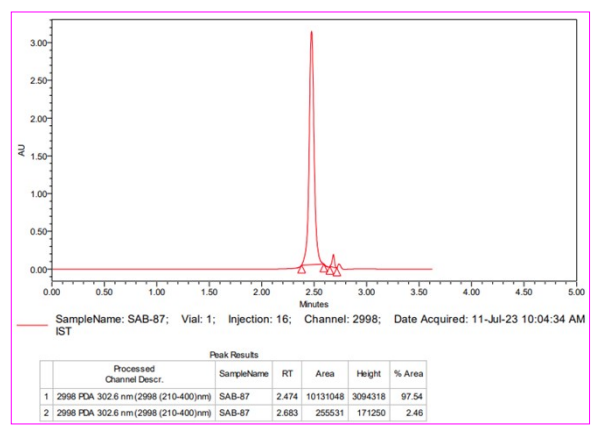

## HPLC Profile of 3ad & 3ae

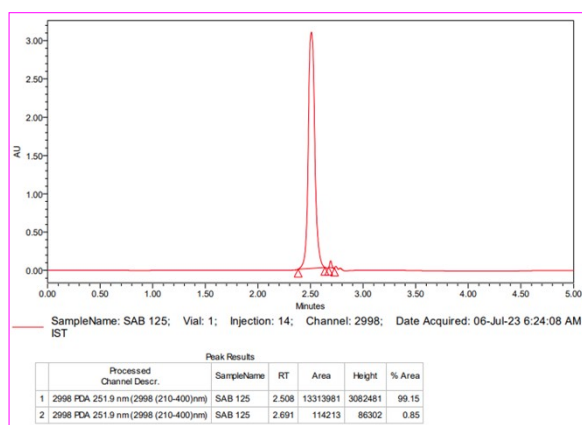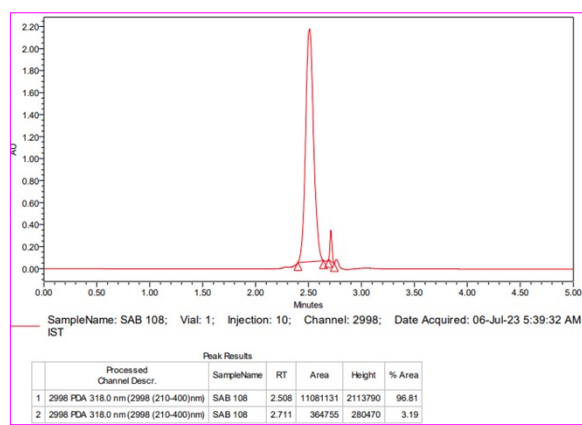

## HPLC Profile of 3be & 3af

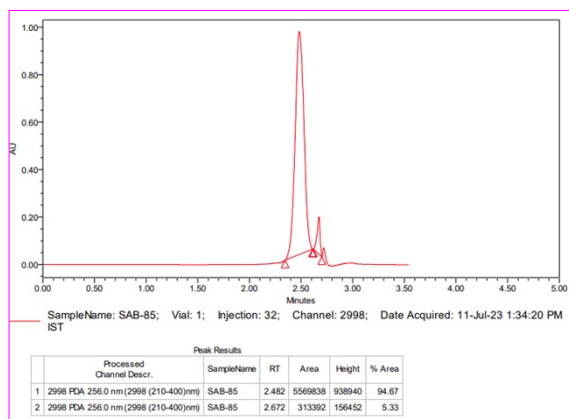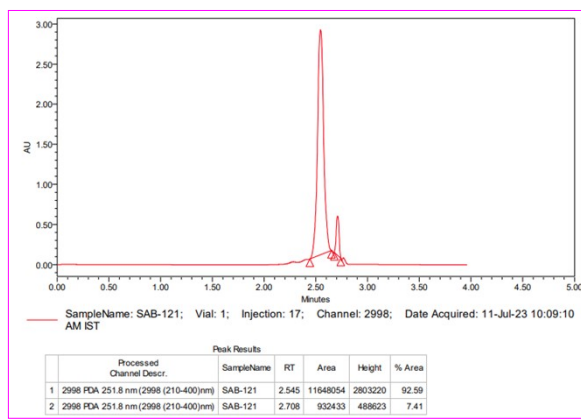

## HPLC Profile of 3bg & 3ah

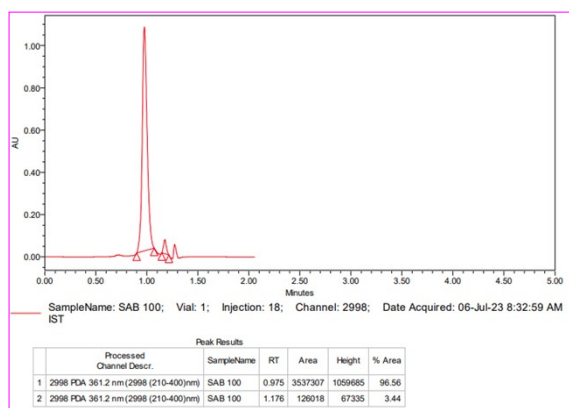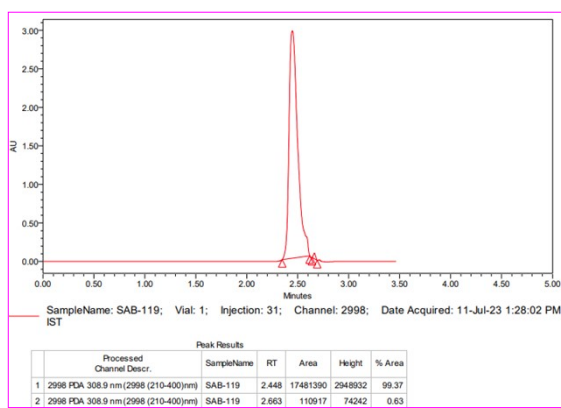



### HPLC Profile of 3bh & 3bi

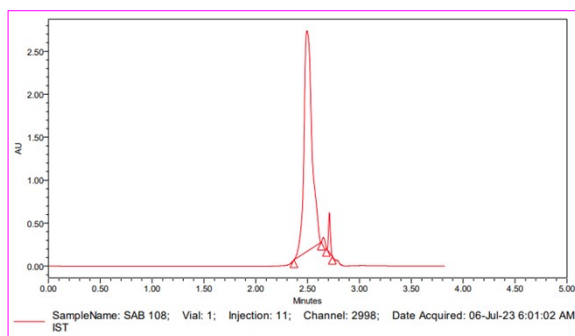

| Peak Results                          |            |       |          |         |        |
|---------------------------------------|------------|-------|----------|---------|--------|
| Processed Channel Descr.              | SampleName | RT    | Area     | Height  | % Area |
| 1 2998 PDA 247.5 nm(2998 (210-400)nm) | SAB 108    | 2.493 | 13810061 | 2568803 | 96.08  |
| 2 2998 PDA 247.5 nm(2998 (210-400)nm) | SAB 108    | 2.709 | 563782   | 459746  | 3.92   |

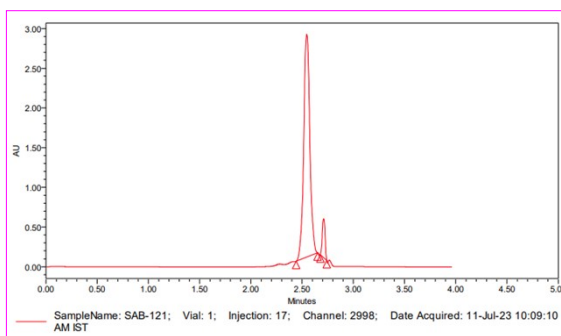

| Peak Results                          |            |       |          |         |        |
|---------------------------------------|------------|-------|----------|---------|--------|
| Processed Channel Descr.              | SampleName | RT    | Area     | Height  | % Area |
| 1 2998 PDA 251.8 nm(2998 (210-400)nm) | SAB-121    | 2.545 | 11648054 | 2803220 | 92.59  |
| 2 2998 PDA 251.8 nm(2998 (210-400)nm) | SAB-121    | 2.708 | 932433   | 488623  | 7.41   |

### HPLC Profile of 3aj & 3ak

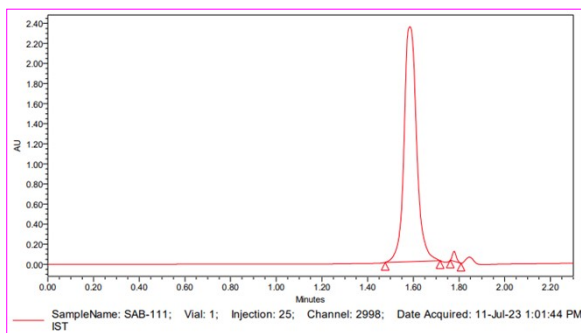

| Peak Results                          |            |       |         |         |        |
|---------------------------------------|------------|-------|---------|---------|--------|
| Processed Channel Descr.              | SampleName | RT    | Area    | Height  | % Area |
| 1 2998 PDA 352.7 nm(2998 (210-400)nm) | SAB-111    | 1.585 | 8972140 | 2339119 | 98.69  |
| 2 2998 PDA 352.7 nm(2998 (210-400)nm) | SAB-111    | 1.778 | 119340  | 101072  | 1.31   |

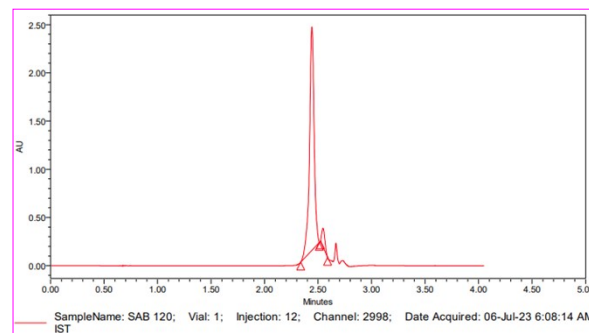

| Peak Results                          |            |       |         |         |        |
|---------------------------------------|------------|-------|---------|---------|--------|
| Processed Channel Descr.              | SampleName | RT    | Area    | Height  | % Area |
| 1 2998 PDA 245.3 nm(2998 (210-400)nm) | SAB 120    | 2.441 | 7045630 | 2317001 | 94.64  |
| 2 2998 PDA 245.3 nm(2998 (210-400)nm) | SAB 120    | 2.545 | 396093  | 192743  | 5.36   |

### HPLC Profile of 3bk & 3al

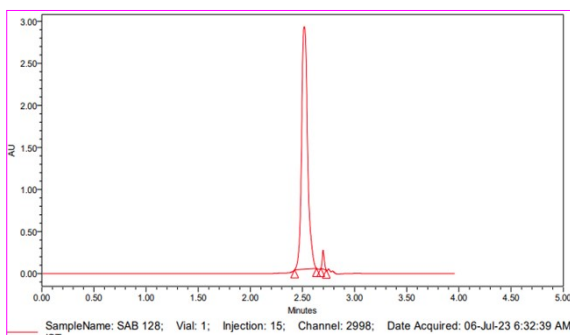

| Peak Results                          |            |       |          |         |        |
|---------------------------------------|------------|-------|----------|---------|--------|
| Processed Channel Descr.              | SampleName | RT    | Area     | Height  | % Area |
| 1 2998 PDA 254.2 nm(2998 (210-400)nm) | SAB 128    | 2.517 | 11598420 | 2882990 | 97.51  |
| 2 2998 PDA 254.2 nm(2998 (210-400)nm) | SAB 128    | 2.697 | 296393   | 225291  | 2.49   |

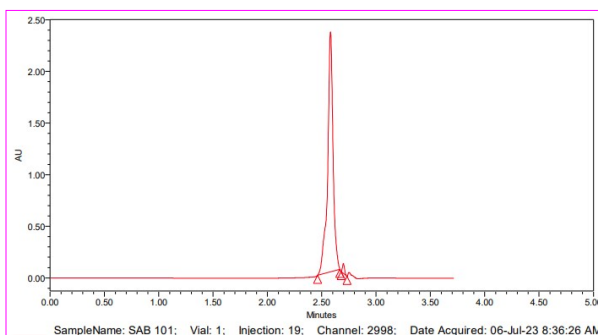

| Peak Results                          |            |       |         |         |        |
|---------------------------------------|------------|-------|---------|---------|--------|
| Processed Channel Descr.              | SampleName | RT    | Area    | Height  | % Area |
| 1 2998 PDA 301.6 nm(2998 (210-400)nm) | SAB 101    | 2.580 | 8100317 | 2323876 | 96.47  |
| 2 2998 PDA 301.6 nm(2998 (210-400)nm) | SAB 101    | 2.699 | 126085  | 93864   | 1.53   |

### HPLC Profile of 3bl & 3bm

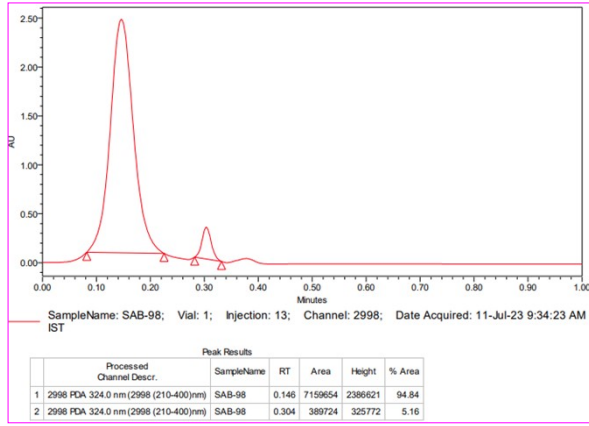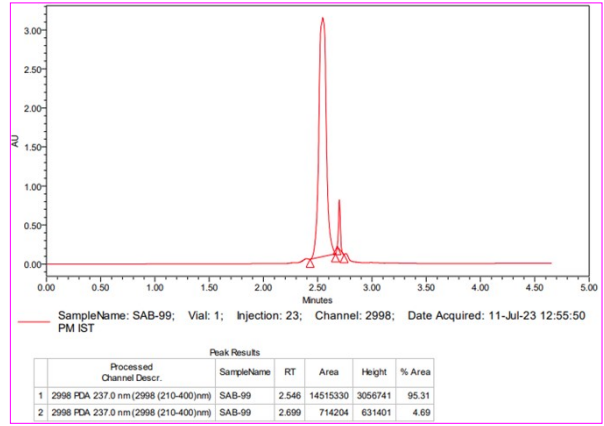

### HPLC Profile of 3bn & 3bo

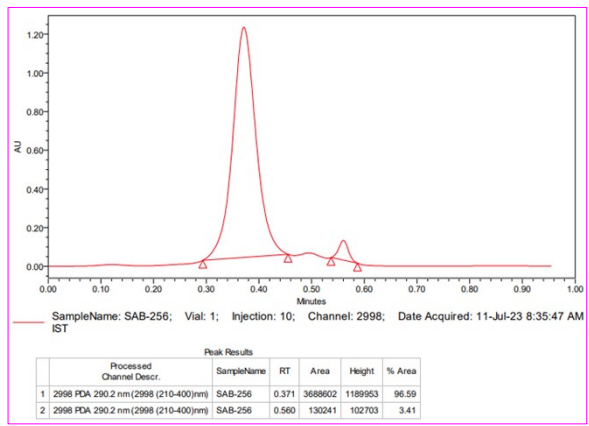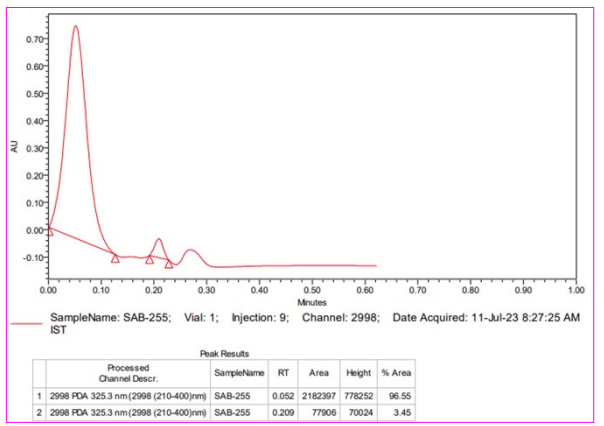

### HPLC Profile of 3bp & 3aq

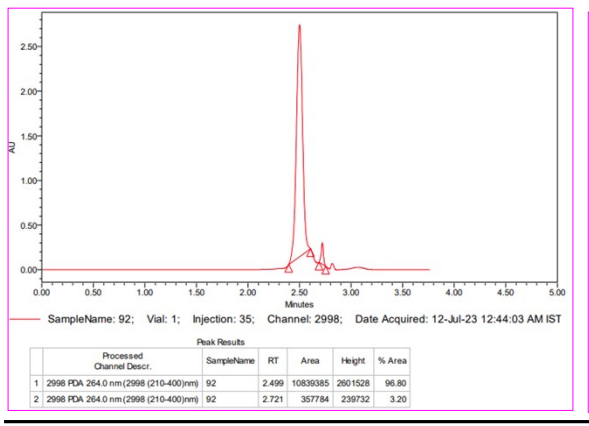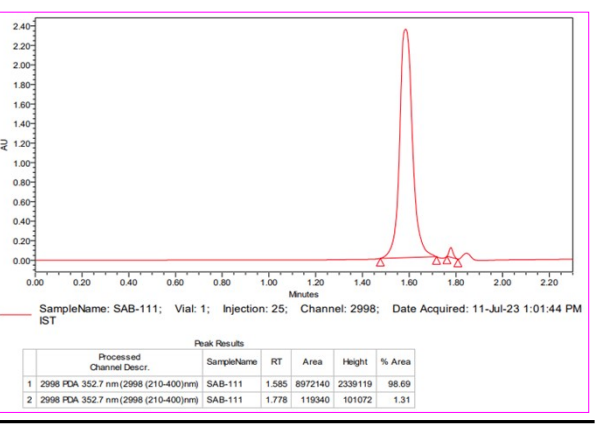

### HPLC Profile of 3bq & 3ar

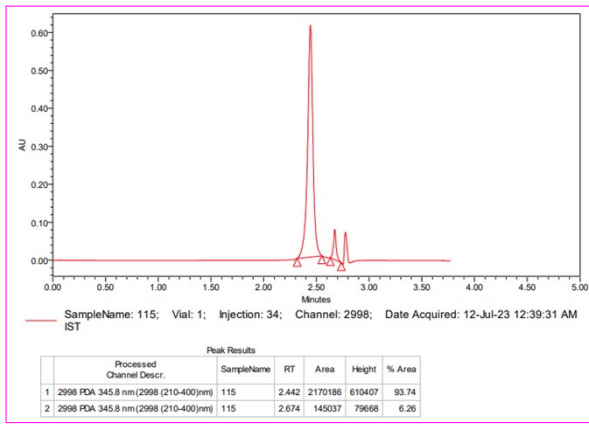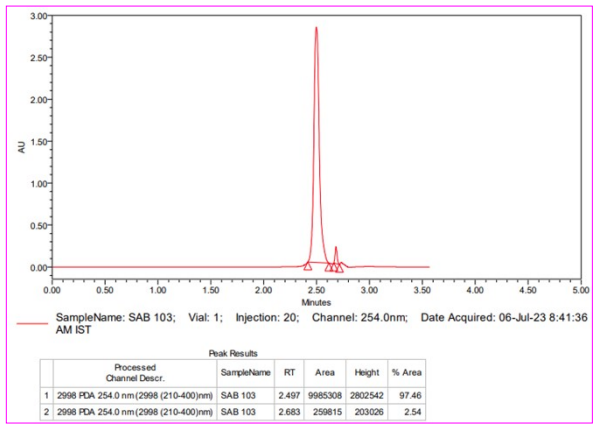

### HPLC Profile of 3as & 3bs

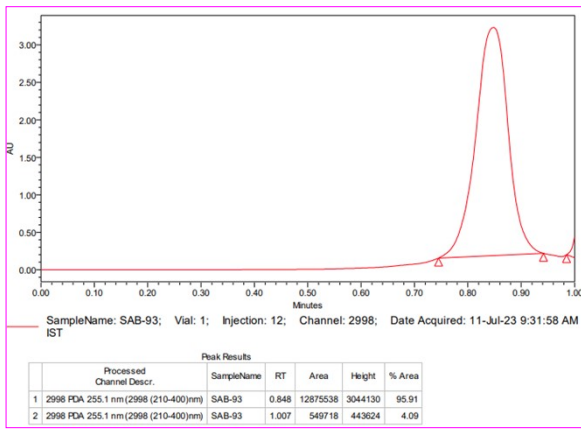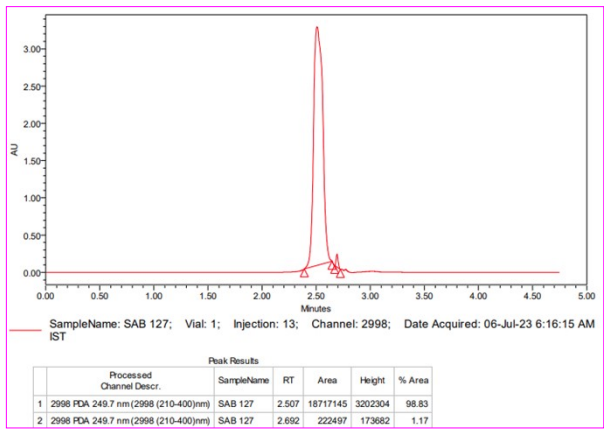

### HPLC Profile of 3bt & 3bu

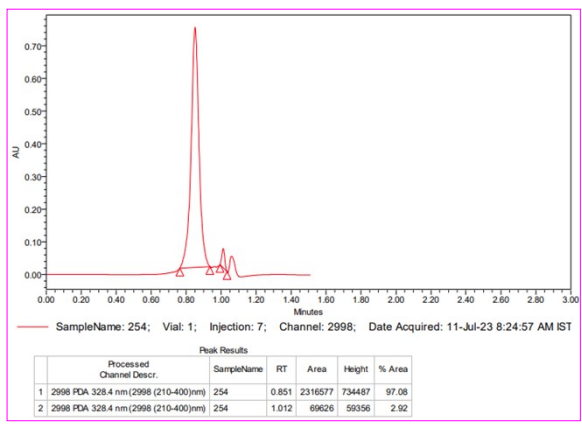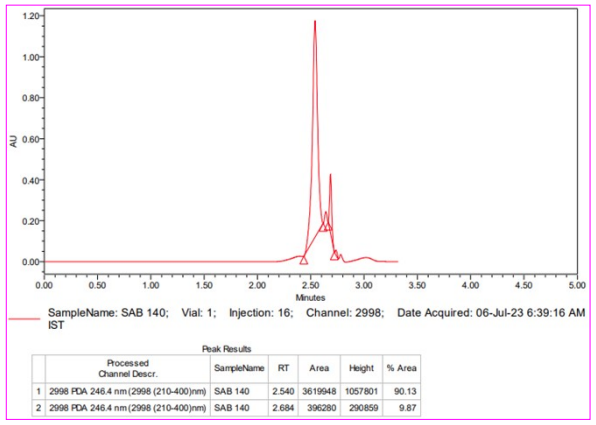

### HPLC Profile of 3bv & 3ax

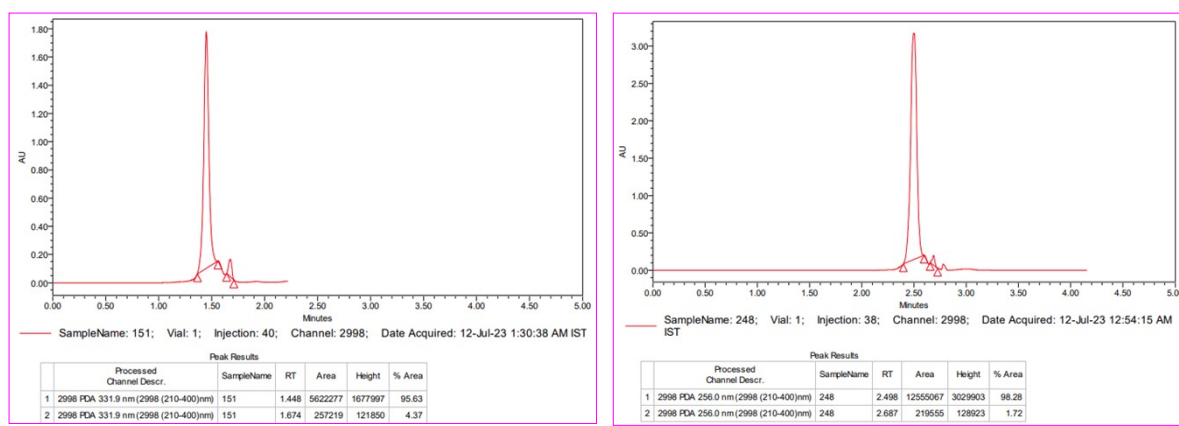

## 6. X-Ray Crystallographic Study of **3aa**

A transparent block-shaped crystal was cut to obtain a single crystal, which was chosen by using a polarizing microscope. The crystal was immersed in Paratone-N oil and mounted on goniometer head with nylon loop. To obtain the crystal structure data, a Kappa APEX II diffractometer was used. The diffractometer was equipped with CCD detector and a sealed-tube monochromated MoK $\alpha$  radiation which was used for centering and screening the crystal, determining unit cell for primary evaluation and data collection (with crystal to detector distance 50 mm). The temperature at which data collection was done is 298 K. An APEX3<sup>4</sup> program was used for the data integration, and SAINT<sup>1</sup> program was used to fit the reflections and obtaining  $F^2$  and  $\sigma(F^2)$  values. Lorentz and polarization effects were also corrected. To obtain a final structure solution, space group was decided along with absorption correction (SADABS)<sup>4</sup>, using a subroutine XPREP.<sup>4</sup> The data was merged and required files were generated for proper analysis and refinement. The direct method was used in structure solution using SHELXS program of SHELXTL package followed by refinement using SHELXL.<sup>5,6</sup> The anisotropic refinement parameters were used to refine all NHAs (non-hydrogen atoms) and the hydrogen atoms present were refined as riding atoms with individual isotropic displacement parameters. All the figures presented were drawn using MERCURY 2023 1.0<sup>7</sup>

Crystal data for **3aa**. C<sub>42</sub>H<sub>56</sub>N<sub>2</sub>O<sub>4</sub>, Mr = 652.88 g/mol, orthorhombic, space group  $P2_12_12_1$  (No. 19),  $a = 9.2466(7)$  Å,  $b = 11.7371(8)$  Å,  $c = 33.379(3)$  Å,  $\alpha = 90^\circ$ ,  $\beta = 90^\circ$ ,  $\gamma = 90^\circ$ ,  $V = 3622.6(5)$  Å<sup>3</sup>,  $Z = 4$ ,  $T = 296.15$  K,  $D_{\text{calcd}} = 1.197$  g/cm<sup>3</sup>; Full matrix least-square on  $F^2$ ;  $R_1 = 0.0446$ ,  $wR_2 = 0.0924$  for 5377 observed reflections [ $I > 2\sigma(I)$ ] and  $R_1 = 0.0701$ ,  $wR_2 = 0.1021$  for all 7340 reflections; number of parameters = 443; GOF = 1.024.

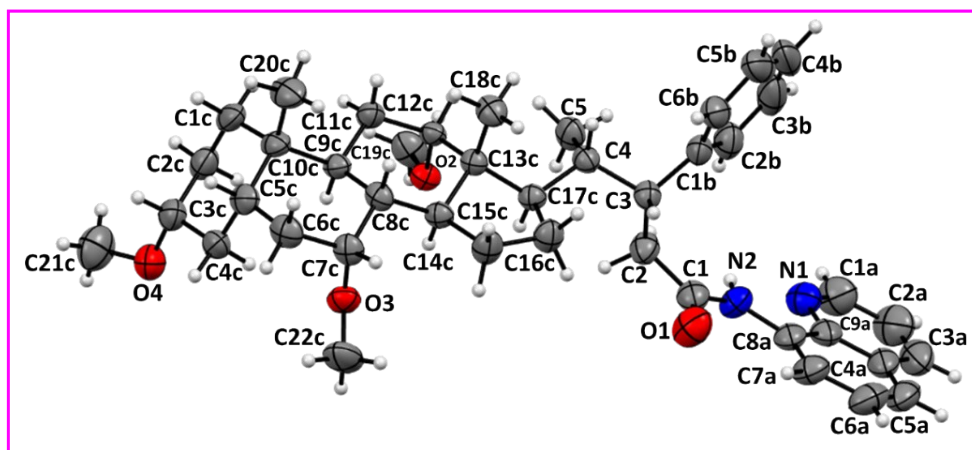

**Figure S1.** ORTEP view of the asymmetric unit in **3aa**. Non-hydrogen atoms are depicted as ellipsoids with 30% probability. Hydrogen atoms are represented by spheres with random radius.

## 7. References

1. Behera, H.; Madhavan, N., Anion-selective cholesterol decorated macrocyclic transmembrane ion carriers. *J. Am. Chem. Soc.* **2017**, *139*, 12919-12922.
2. Wang, L.; Jiang, X.; Tang, P., Silver-Mediated Fluorination of Alkyl Iodides with TMS $\text{CF}_3$  as The Fluorinating Agent. *Org. Chem. Front.* **2017**, *4*, 1958-1961.
3. Gou, Q.; Zhang, Z.-F.; Liu, Z.-C.; Qin, J., Palladium-Catalyzed  $\text{Cs}_2\text{CO}_3$ -Promoted Arylation of Unactivated  $\text{C}(\text{sp}^3)\text{-H}$  Bonds by (Diacetoxyiodo) arenes: Shifting the Reactivity of (Diacetoxyiodo) arenes from Acetoxylation to Arylation. *J. Org. Chem.* **2015**, *80*, 3176-3186.
4. APEX2, SADABS and SAINT; Bruker AXS inc: Madison, WI, USA, **2015**.
5. Sheldrick, G. M. *Acta Crystallogr., Sect. A: Found. Adv.*, **2015**, *71*, 3-8.
6. Sheldrick, G. M. *Acta Crystallogr., Sect. C: Found. Adv.*, **2015**, *71*, 3-8.
7. Macrae, C. F.; Bruno, I. J.; Chisholm, J. A.; Edgington, P. R.; McCabe, P.; Pidcock, E.; Rodriguez-Monge, L.; Taylor, T.; Van de Streek, J.; Wood, P. A. *J. Appl. Cryst.*, **2008**, *41*, 466.
